# Supplementary material for: Convergent synthesis and properties of photoactivable NADPH mimics targeting nitric oxide synthases
Source: Royal Society of Chemistry journal article supplement (doi:10.1039/c6ob01533f), 2016-01-01

## **SUPPORTING INFORMATION**

### **Convergent synthesis and properties of photoactivable NADPH mimics targeting nitric oxide synthases**

N.-H. Nguyen,<sup>a</sup> N. Bogliotti,<sup>a</sup> R. Chennoufi,<sup>b</sup> E. Henry,<sup>b</sup> P. Tauc,<sup>b</sup> E. Salas,<sup>c</sup> L. J. Roman,<sup>c</sup> A. Slama-Schwok,<sup>d</sup> E. Deprez,<sup>b</sup> and J. Xie\*<sup>a</sup>

<sup>a</sup> PPSM, ENS de Cachan, CNRS, Université Paris-Saclay, Cachan, 94235 France

<sup>b</sup> LBPA, ENS de Cachan, CNRS, Université Paris-Saclay, Cachan, 94235 France

<sup>c</sup> Department of Biochemistry, University of Texas Health Science Center, San Antonio, Texas  
78384-7760, United States.

<sup>d</sup> Université Paris Saclay, INRA UR 892, Jouy en Josas, 78350, France.

#### **Table of contents**

|                                                                    |    |
|--------------------------------------------------------------------|----|
| 1. Figure S1: Absorption spectra of NT compounds 1-7               | S2 |
| 2. Figure S2: Fluorescence titration spectra of compounds 1-7      | S3 |
| 3. Figure S3: Immuno-staining of eNOS on fixed cells               | S5 |
| 4. <sup>1</sup> H and <sup>13</sup> C NMR spectra of new compounds | S6 |

## Absorption spectra of NT compounds 1-7

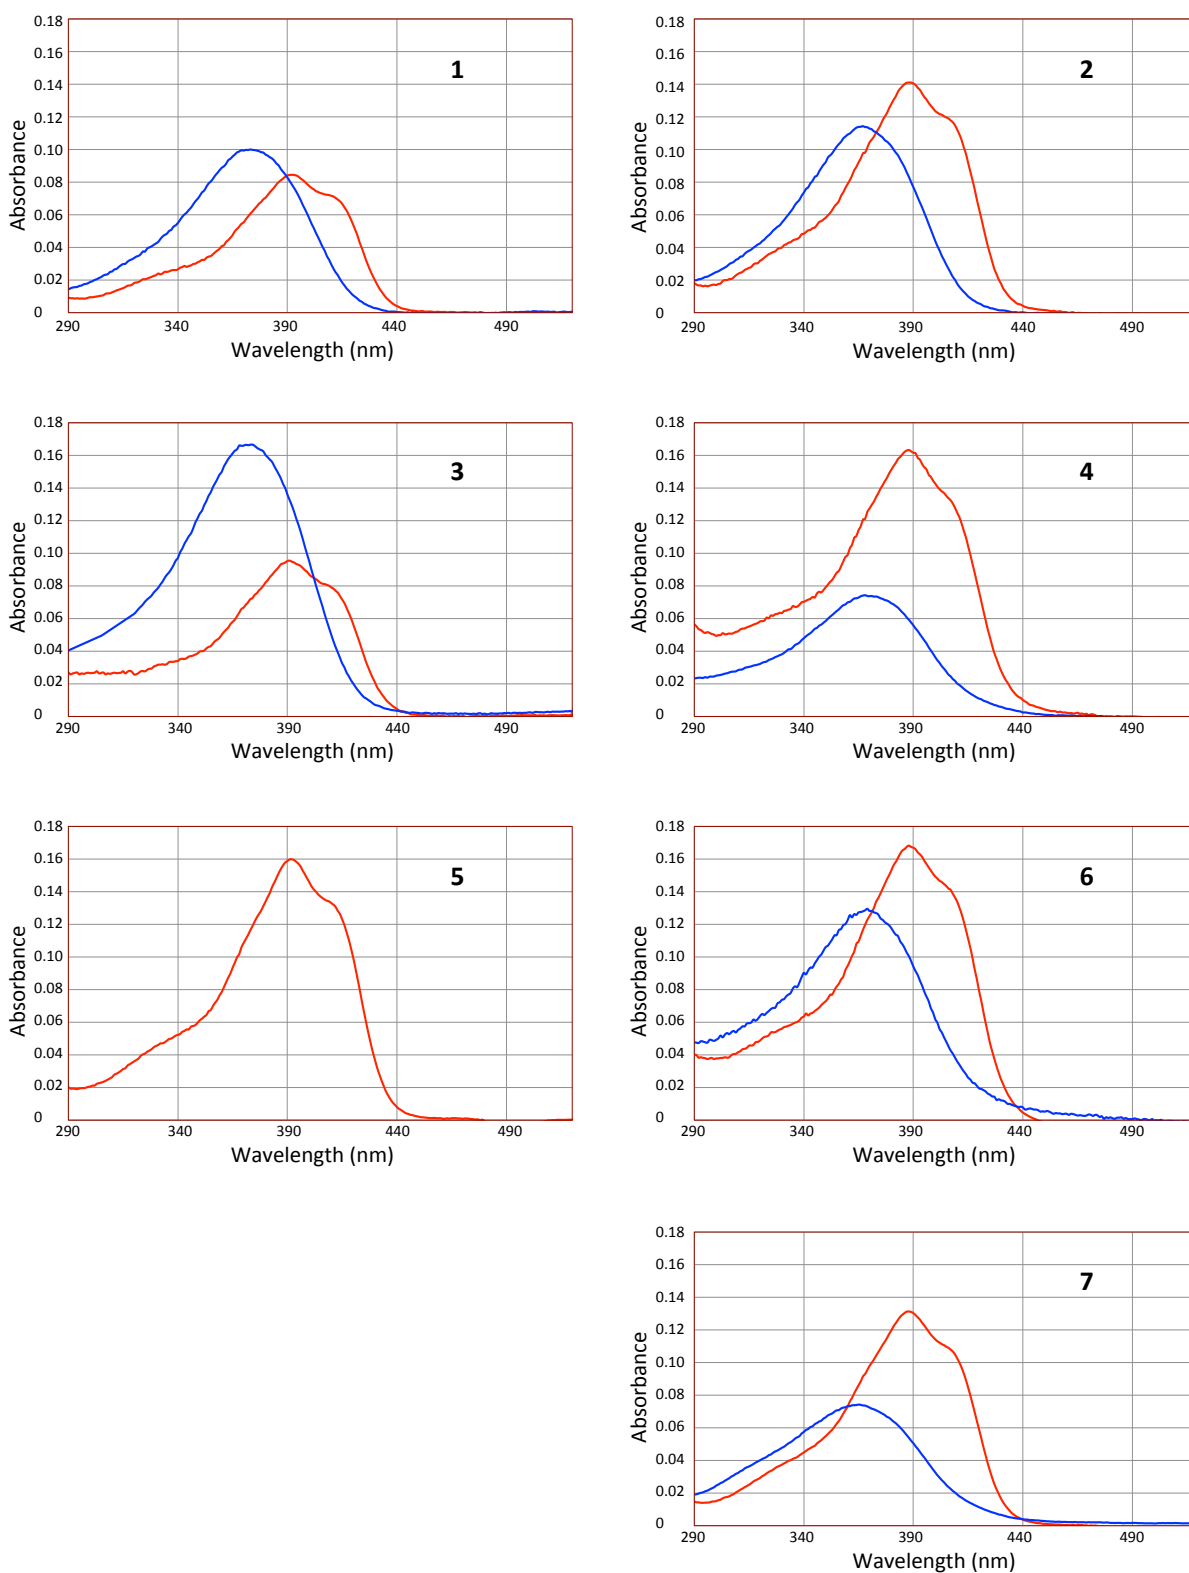

Figure S1: Absorption spectra of NT compounds **1-7** in Tris-HCl buffer (blue) or in DMSO (red). Left column: NT compounds with  $R_1 = \text{CH}_3$  (**1, 3, 5**); right column: NT compounds with  $R_1 = \text{H}$  (**2, 4, 6, 7**). NT concentration was  $2 \mu\text{M}$ .

# Fluorescence titration spectra of NT compounds 1-7 with NOS

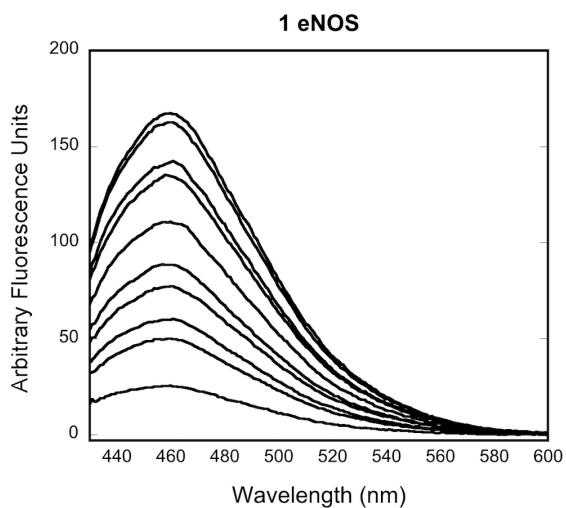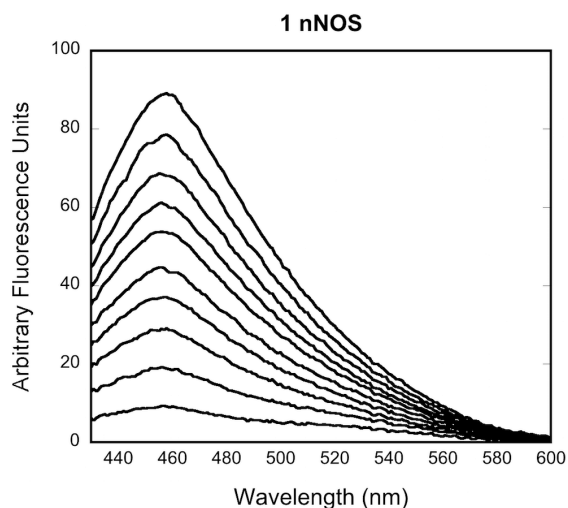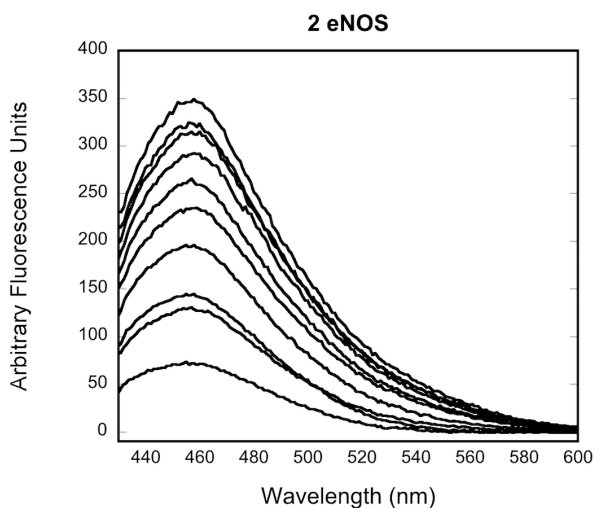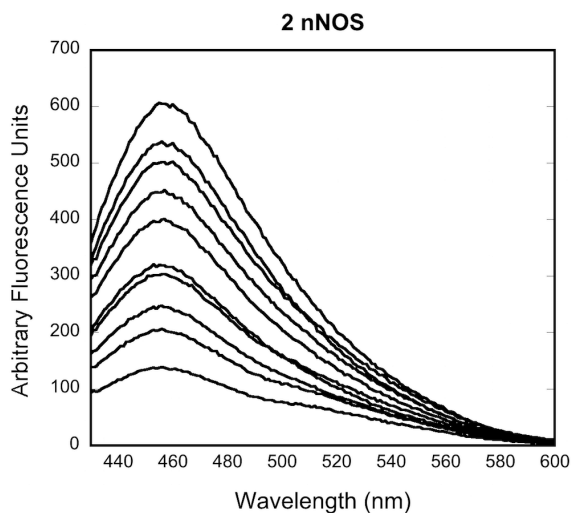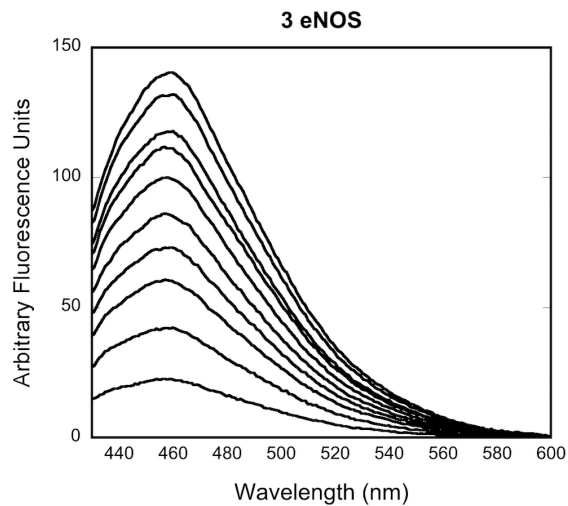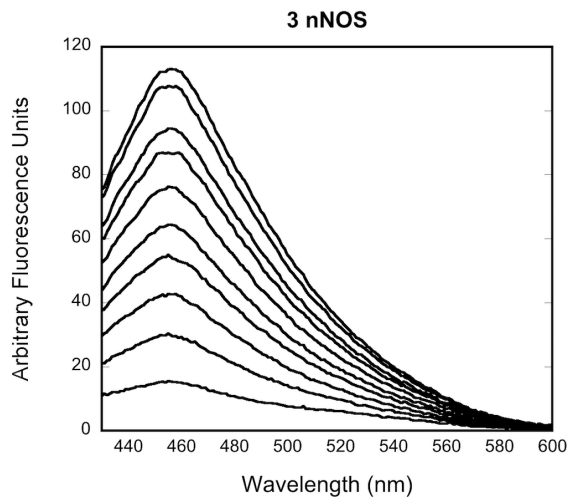

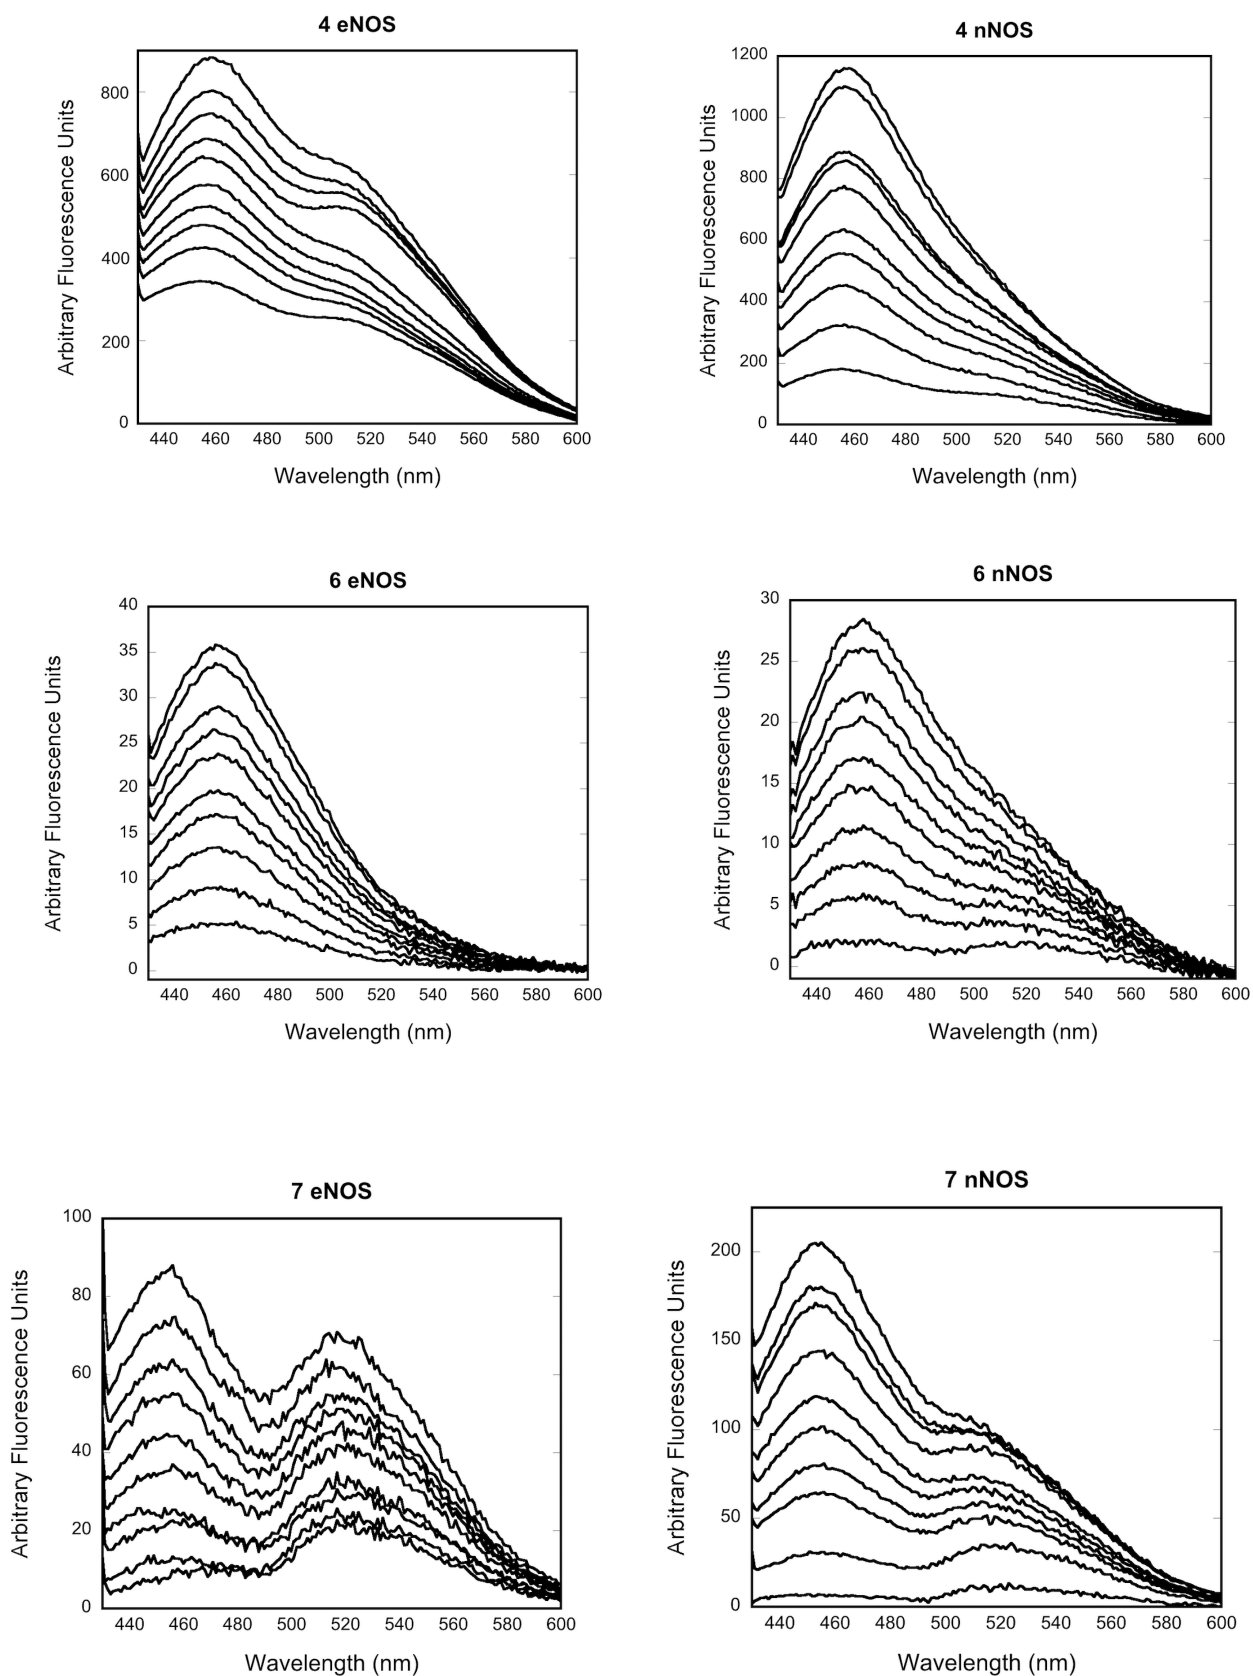

Figure S2: Fluorescence titration spectra of NT compounds **1-7** with NOS minus the spectra of free NOS and free NT. Data shown are representative from at least  $n = 3$  titrations. NT concentrations are: 3, 6, 9, 12, 15, 20, 25, 30, 40, and 50  $\mu\text{M}$  (spectra from bottom to top, respectively). NOS protein concentration was 5  $\mu\text{M}$ . The excitation wavelength for all compounds was 420 nm and emission spectra were recorded from 430-700 nm.

### Immuno-staining of eNOS on fixed cells.

The procedure for eNOS immuno-staining was previously described.<sup>1</sup> Briefly, PBS-0.5% Saponin was used as a permeabilization solution for 10 min at room temperature and the blocking solution was PBS-3% BSA. Purified mouse anti-eNOS/NOS Type III primary antibody (BD-Biosciences, France; ref. no. 610297) was used at a final concentration of 10 µg/mL in PBS-0.5% Saponin /3% BSA. The secondary antibody, AlexaFluor® 594 goat anti-mouse IgG (H+L) was purchased from Invitrogen (France; ref. no. A-11005) and used at a final concentration of 4 µg/mL in PBS-0.5% Saponin / 3% BSA. The fixation buffer BD Cytifix™ was purchased from BD-Biosciences. Confocal images were obtained using a SP2 confocal microscope (Leica MicroSystems).

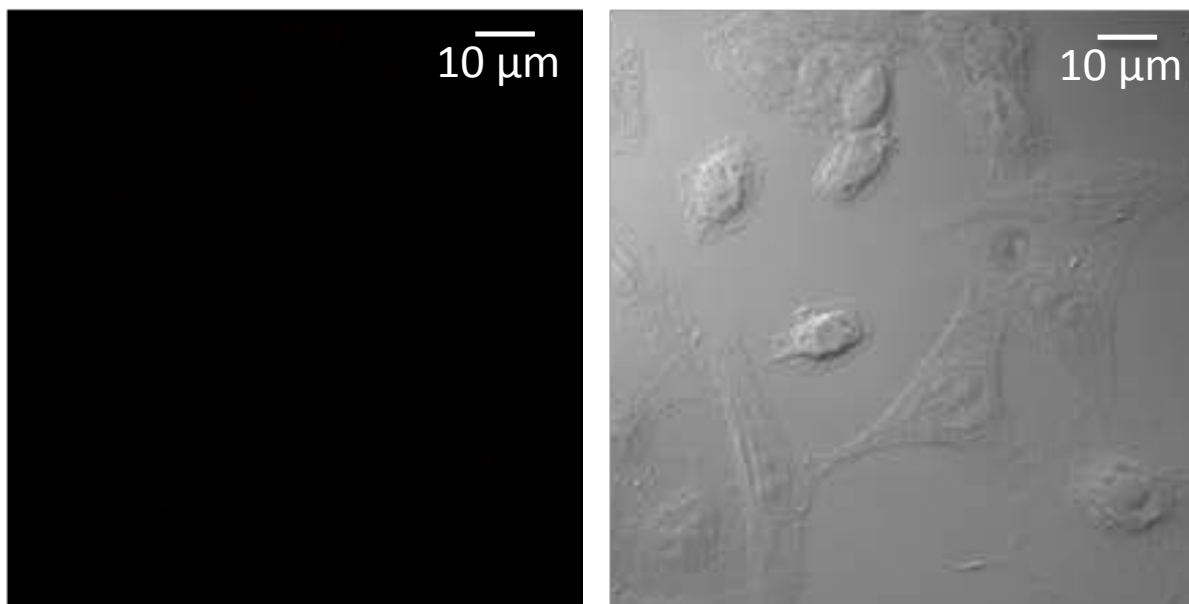

Figure S3: Immuno-staining of eNOS on fixed HeLa cells. HeLa cells were treated with primary and secondary antibodies for immune-staining as indicated above. Primary and secondary antibodies were purified mouse anti-eNOS/NOS Type III and AlexaFluor 594 goat anti-mouse IgG (H+L), respectively. Left, confocal image using the imaging channel of AlexaFluor 594 (excitation, 543 nm; emission slit 590-700 nm); right, corresponding DIC (differential interference contrast) transmission image. No detectable emission signal was observed in the AlexaFluor channel, in sharp contrast to the result obtained with HUVECs using the same procedure (Fig. 5 in reference 1), confirming previous independent studies showing that HeLa cells do not express eNOS.<sup>2-5</sup>

### References:

1. Y. Li, H. Wang, B. Tarus, M. R. Perez, L. Morellato, E. Henry, V. Berka, A.-L. Tsai, B. Ramassamy, H. Dhimane, C. Dessy, P. Tauc, J.-L. Boucher, E. Deprez and A. Slama-Schwok, *Proc. Natl. Acad. Sci. U.S.A* 2012, **109**, 12526-12531.
2. E. Nisoli, E. Clementi, C. Paolucci, V. Cozzi, C. Sciorati, R. Bracale, A. Valerio, M. Francolini, S. Moncada and M. O. Carruba, *Science* 2003, **299**, 896-899.
3. J. E. Fish, C. C. Matouk, A. Rachlis, S. Lin, S. C. Tai, C. D'Abreo and P. A. Marsden, *J. Biol. Chem.* 2005, **280**, 24824-24838.
4. K. Sato, K. Ozaki, I. Oh, A. Meguro, K. Hatanaka, T. Nagai, K. Muroi and K. Ozawa, *Blood* 2007, **109**, 228-234.
5. S. A. Ritchie, C. F. Kohlhaas, A. R. Boy, K. C. Yalla, K. Walsh, J. M. C. Connell and I. P. Salt, *Biochem. J.* 2010, **426**, 85-90.

# $^1\text{H}$ and $^{13}\text{C}$ NMR spectra of new compounds

$^1\text{H}$ -NMR spectrum of **8** ( $\text{CDCl}_3$ , 400 MHz)

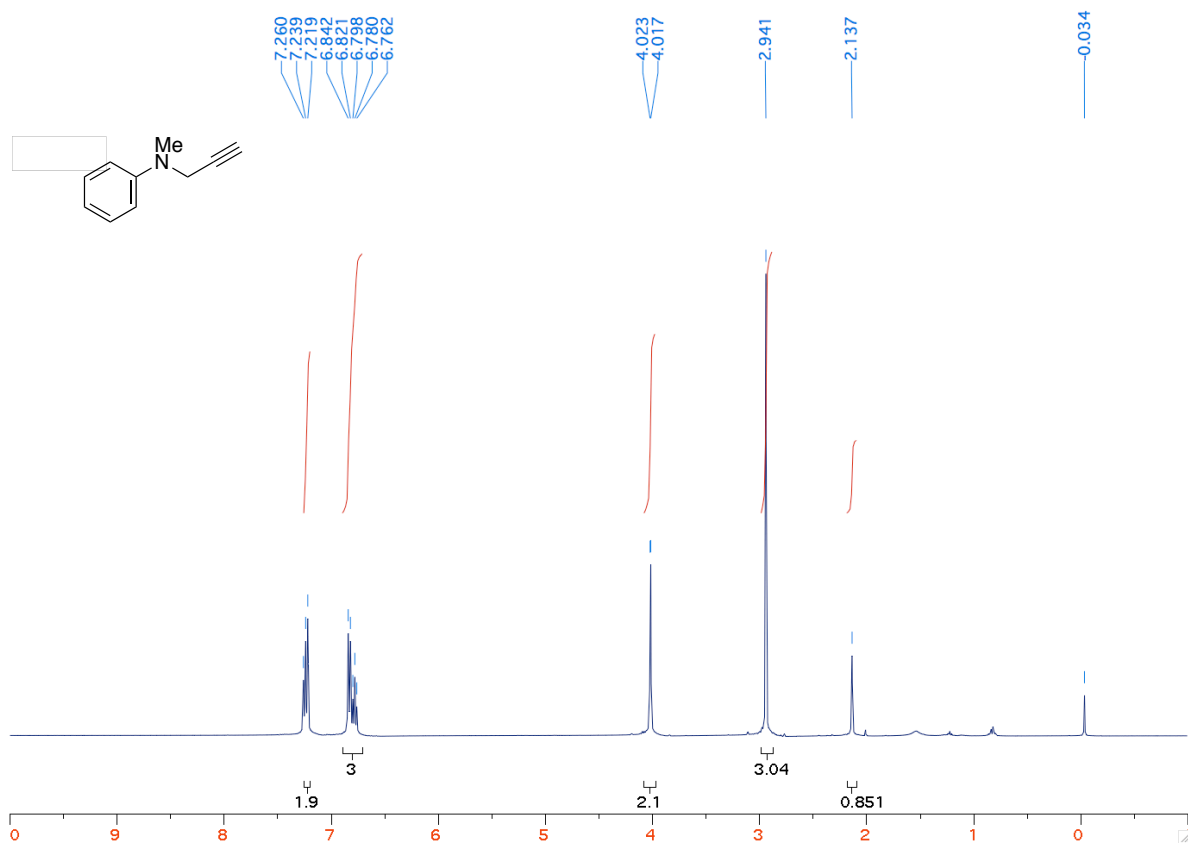

$^{13}\text{C}$ -NMR spectrum of **8** ( $\text{CDCl}_3$ , 100 MHz)

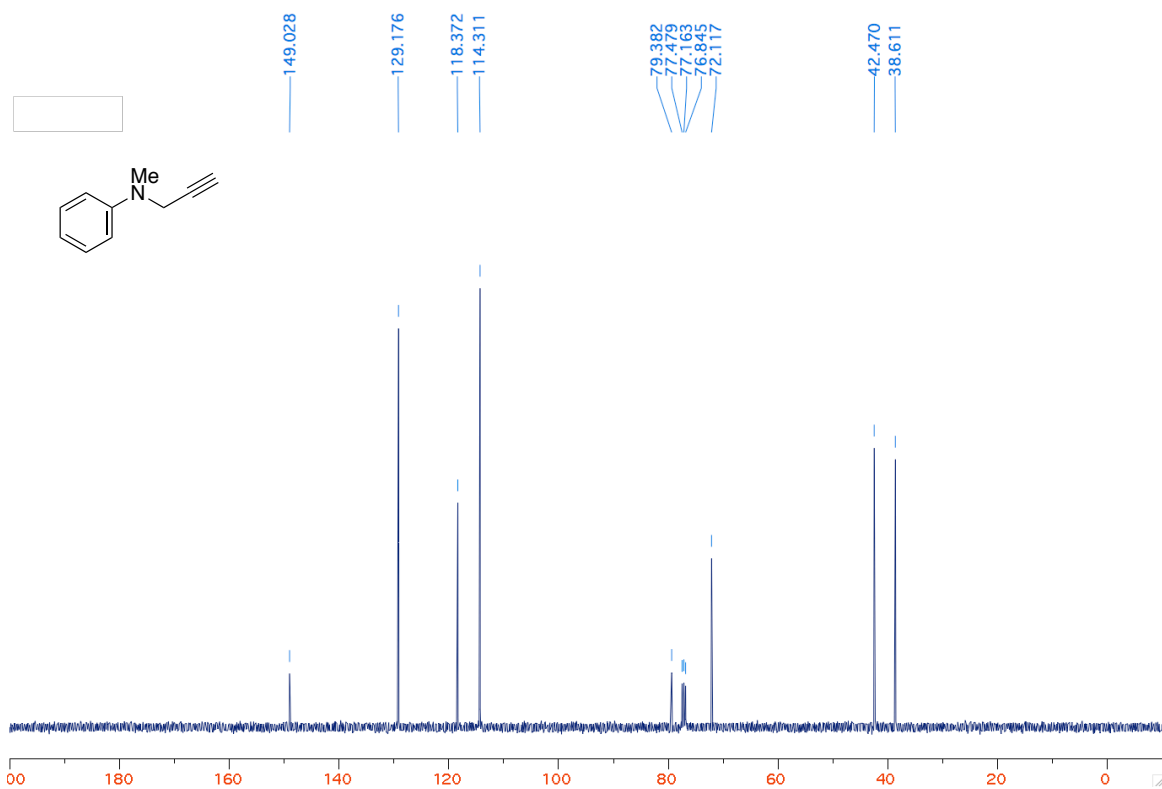

DEPT 135 spectrum of **8** (CDCl<sub>3</sub>, 100 MHz)

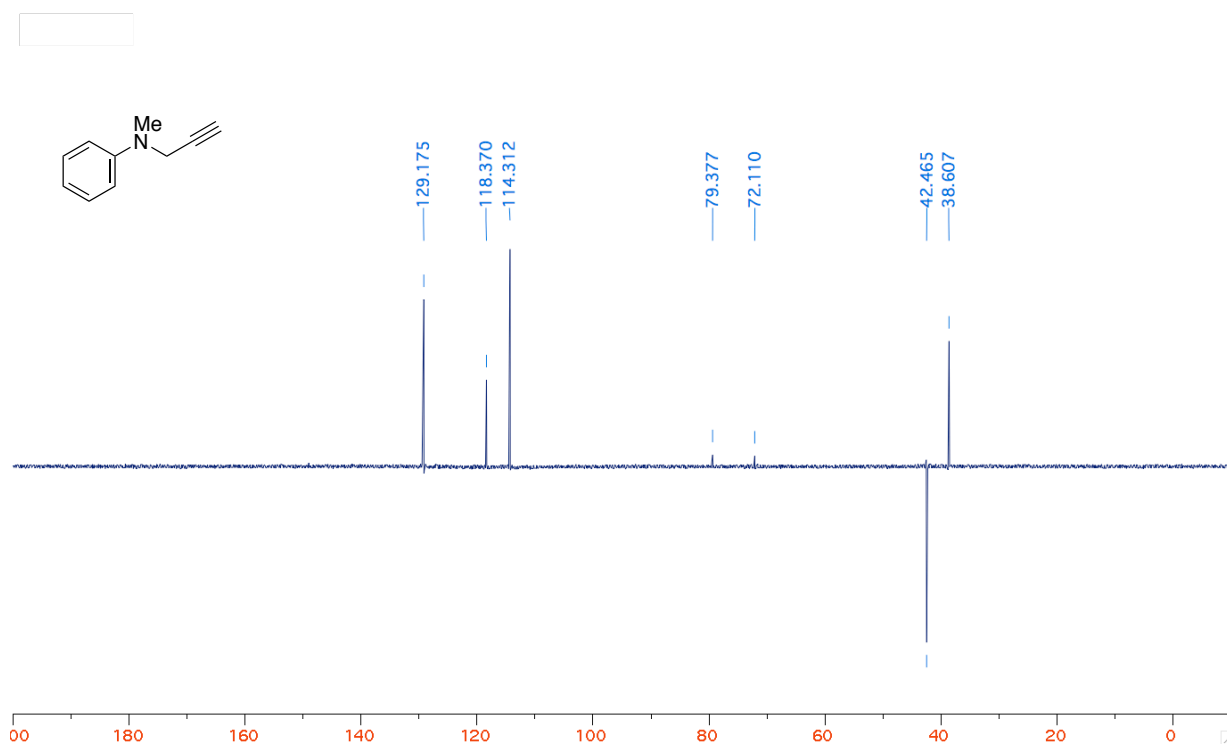

<sup>1</sup>H-NMR spectrum of **9** (CDCl<sub>3</sub>, 400 MHz)

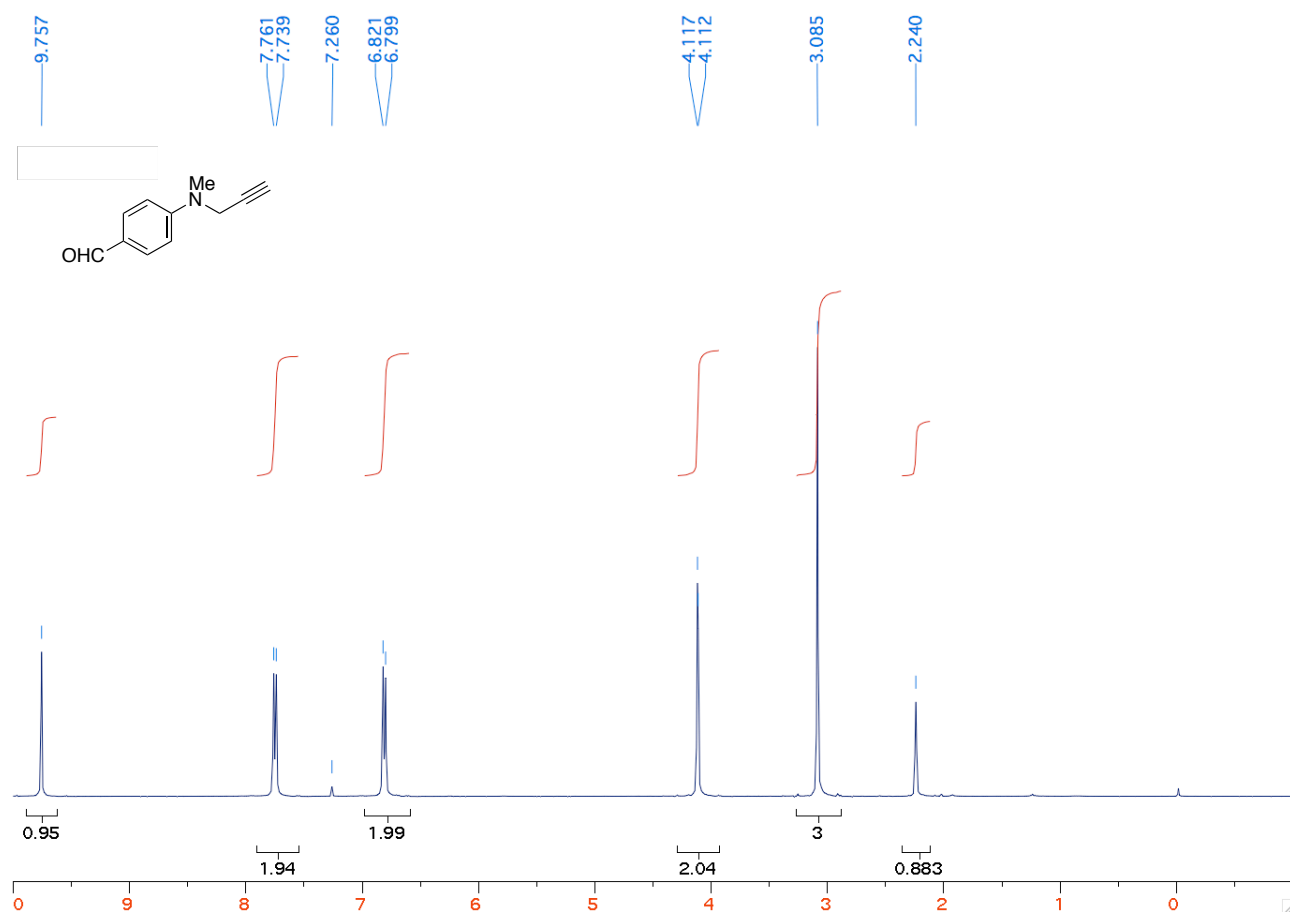

$^{13}\text{C}$ -NMR spectrum of **9** ( $\text{CDCl}_3$ , 100 MHz)

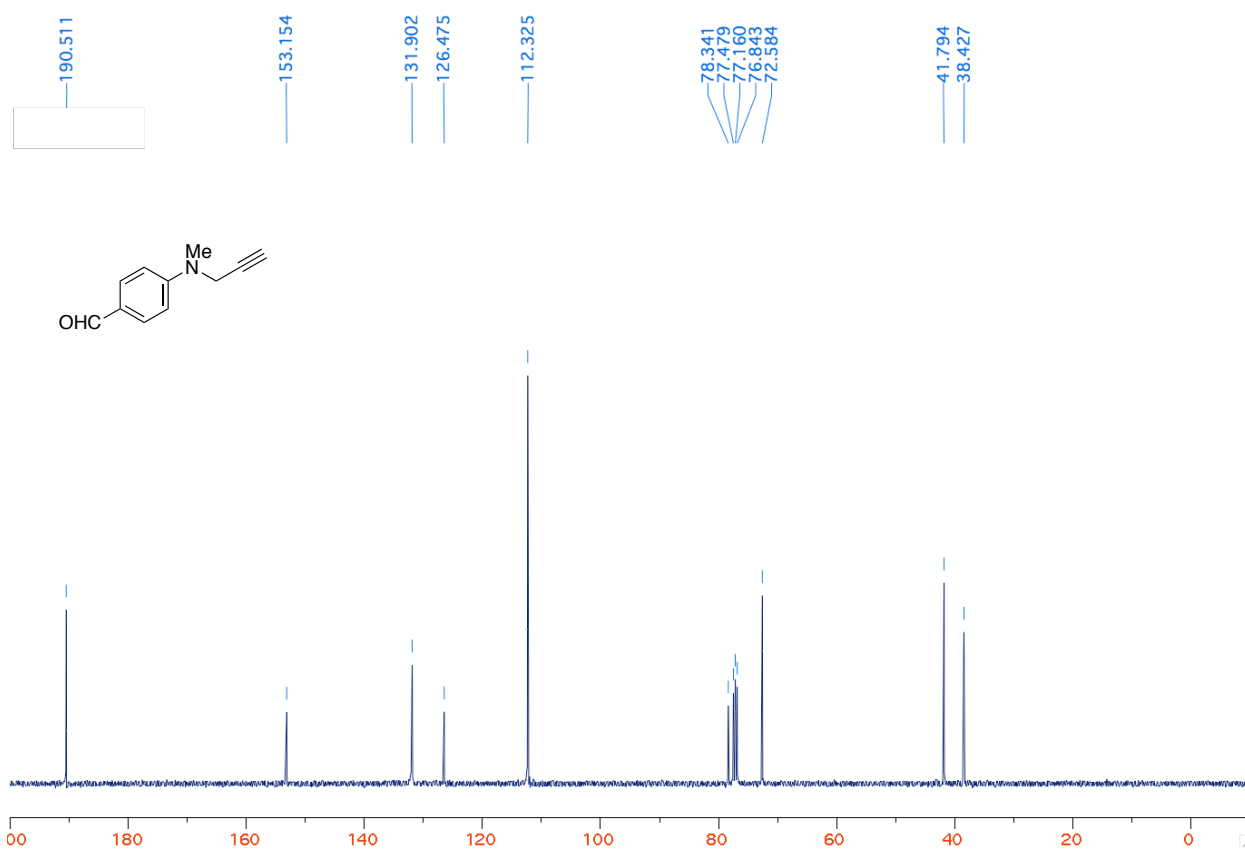

DEPT 135 spectrum of **9** ( $\text{CDCl}_3$ , 100 MHz):

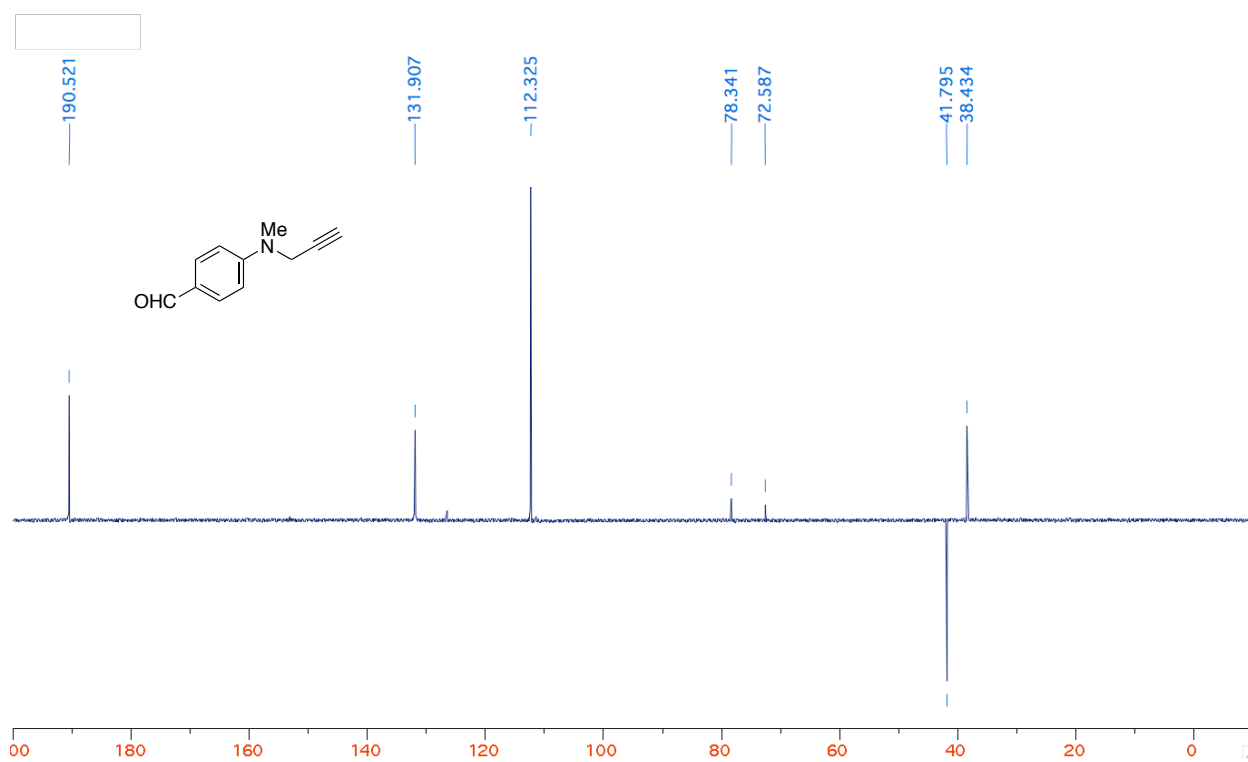



$^1\text{H-NMR}$  spectrum of **10** ( $\text{CDCl}_3$ , 400 MHz)

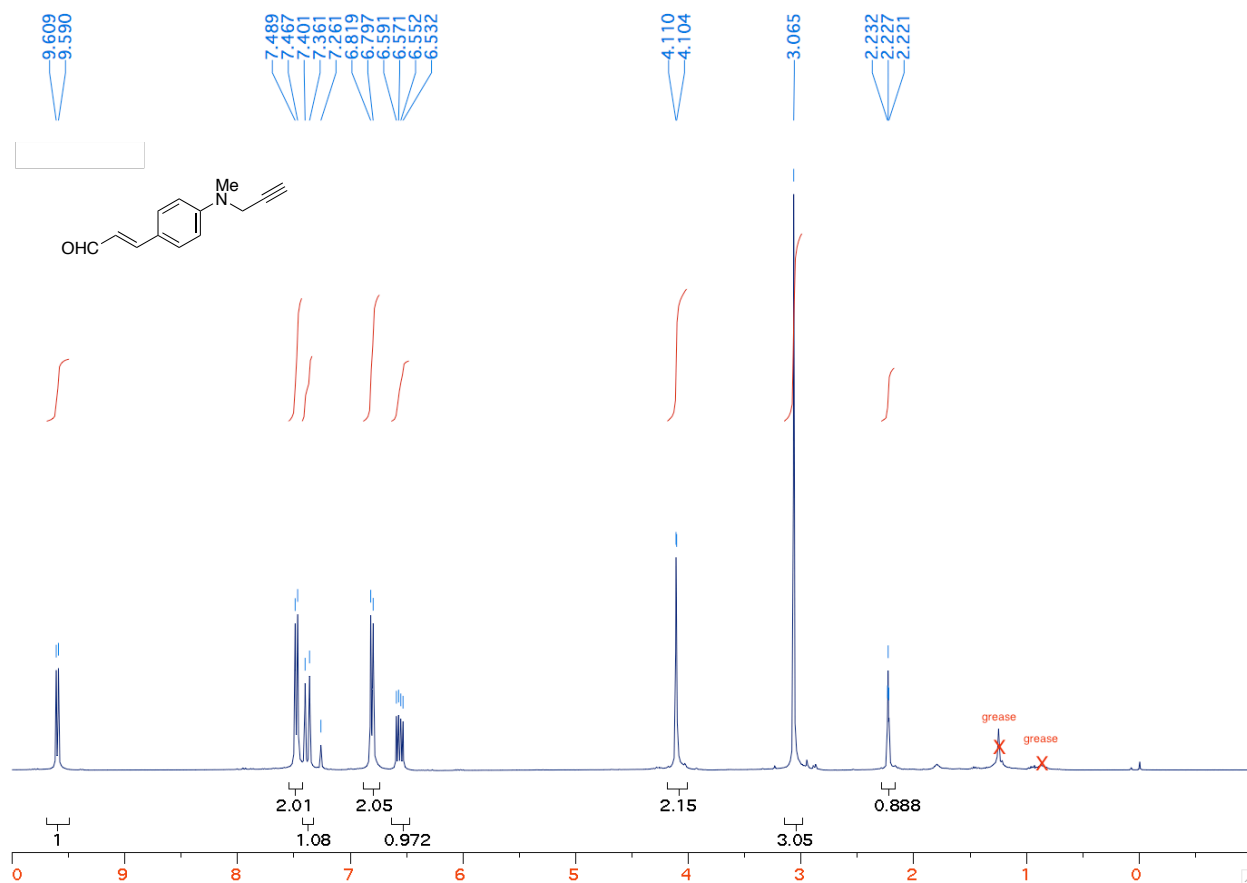

$^{13}\text{C-NMR}$  spectrum of **10** ( $\text{CDCl}_3$ , 100 MHz)

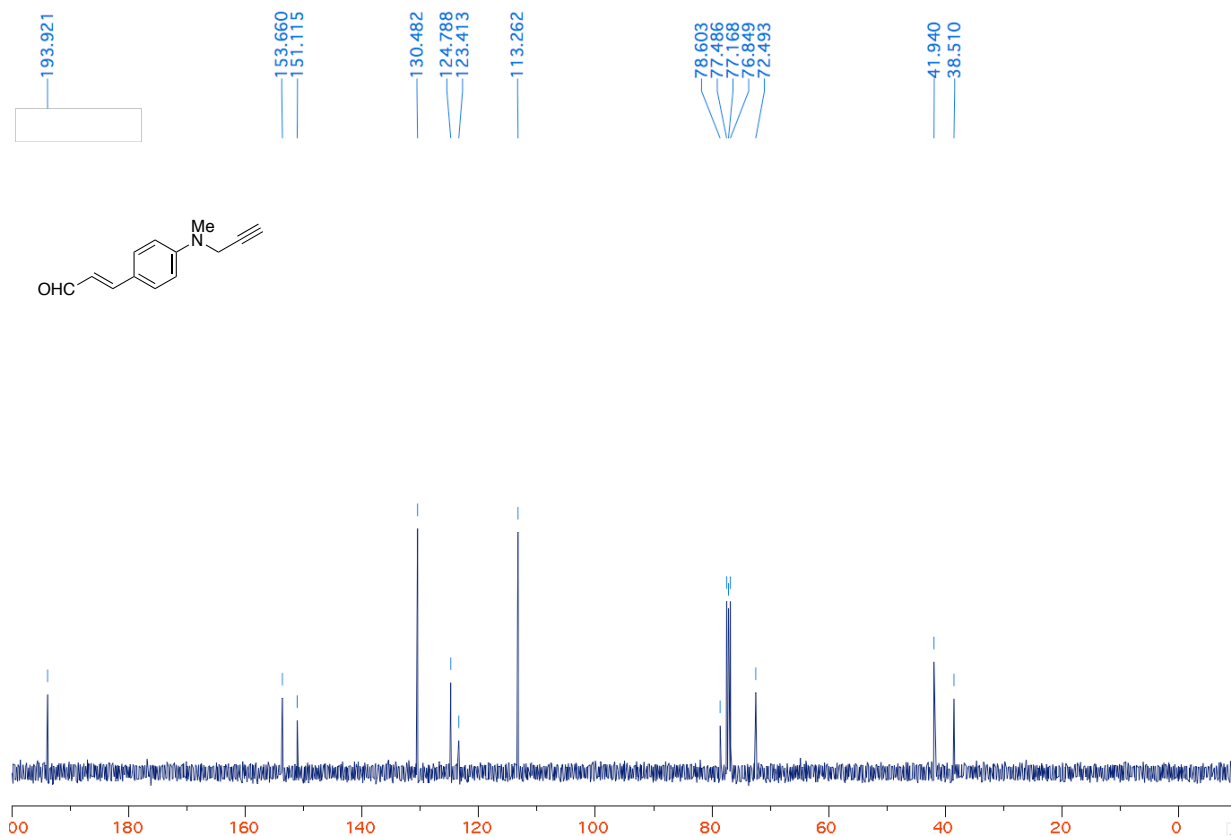

DEPT 135 spectrum of **10** (CDCl<sub>3</sub>, 100 MHz)

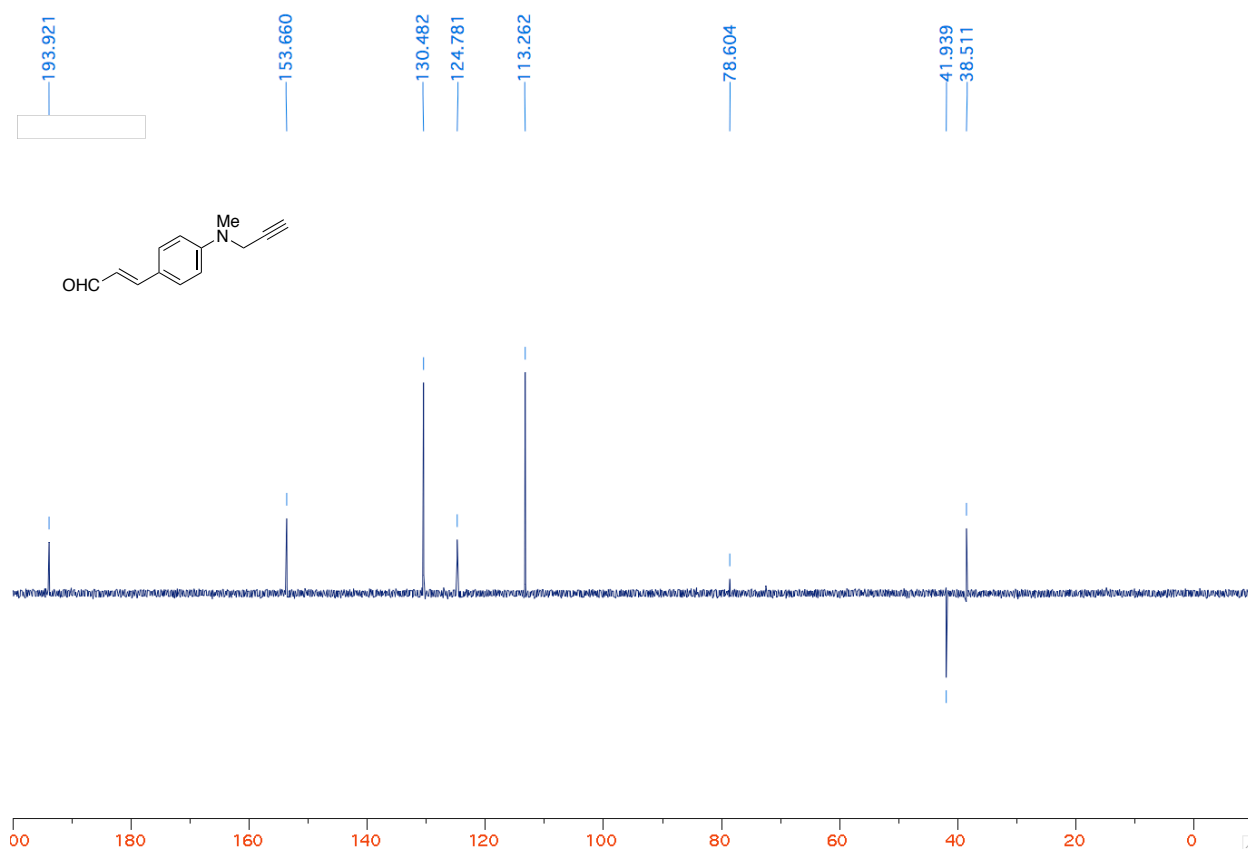

<sup>1</sup>H-NMR spectrum of **11** (CDCl<sub>3</sub>, 400 MHz)

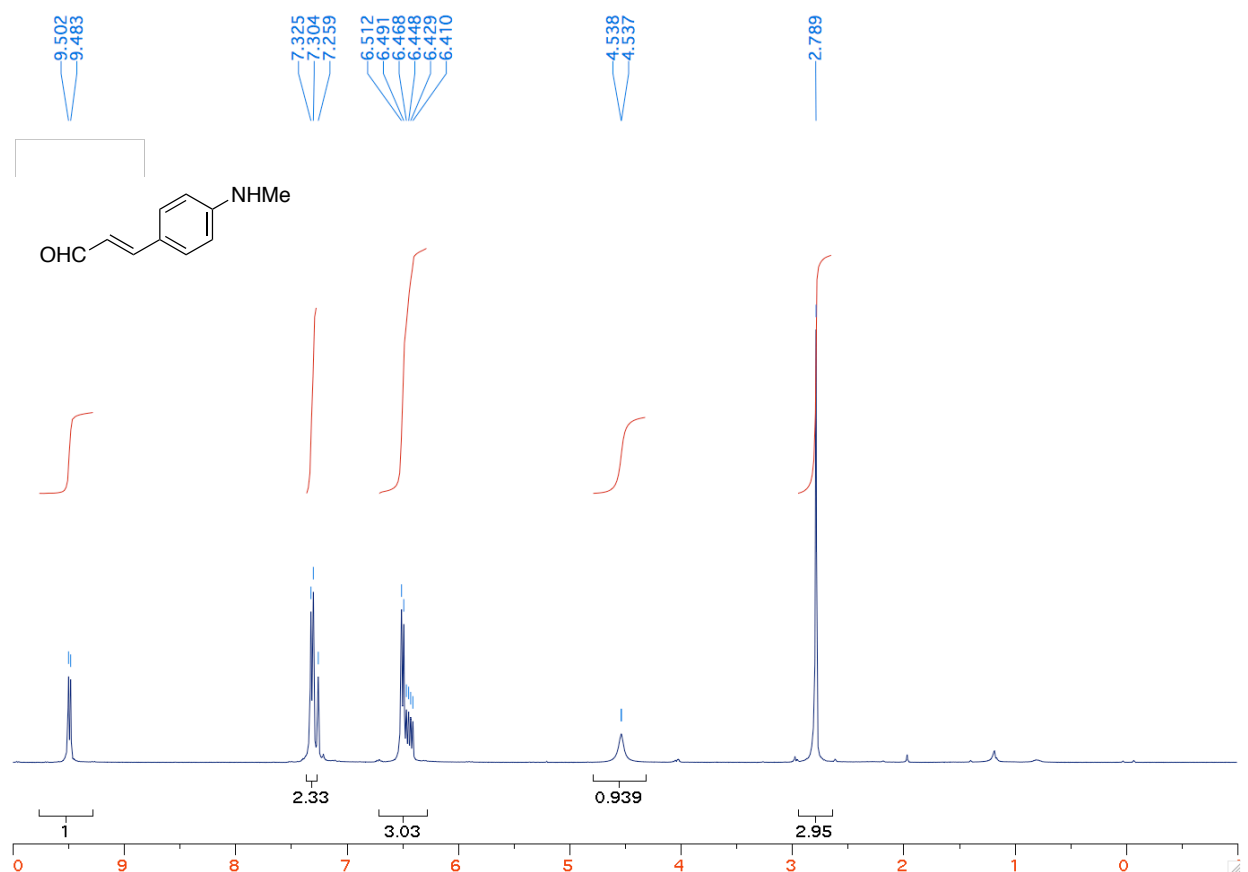

$^{13}\text{C}$ -NMR spectrum of **11** ( $\text{CDCl}_3$ , 100 MHz)

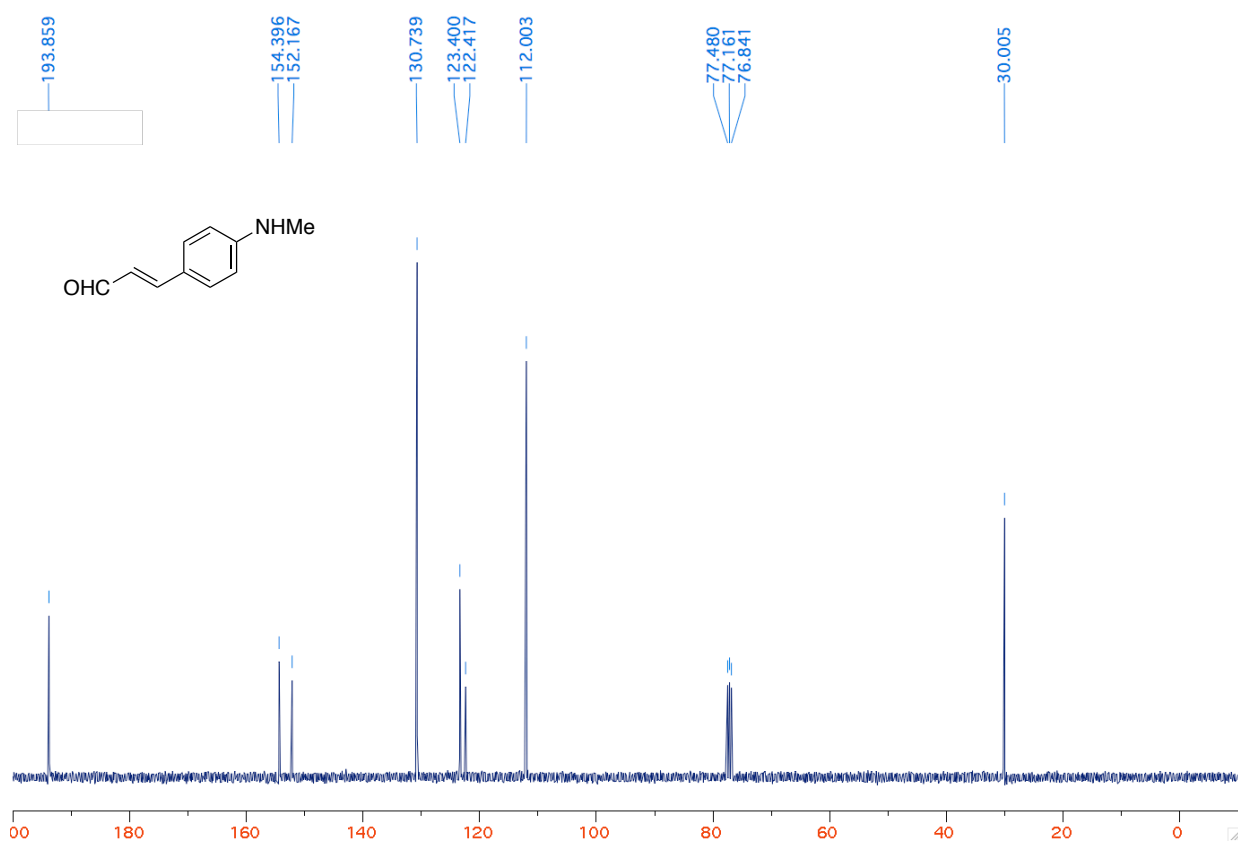

DEPT 135 spectrum of **11** ( $\text{CDCl}_3$ , 100 MHz)

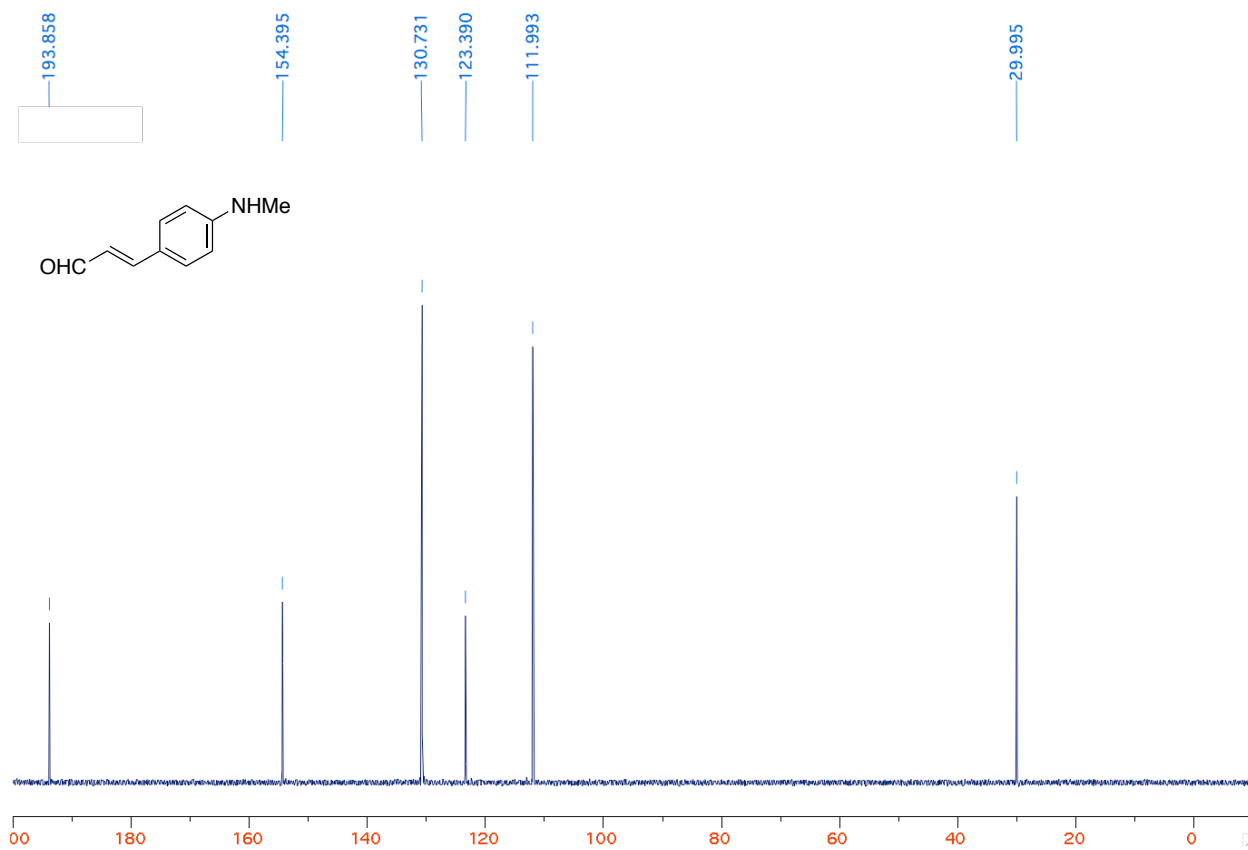

<sup>1</sup>H-NMR spectrum of **12** (CDCl<sub>3</sub>, 400 MHz)

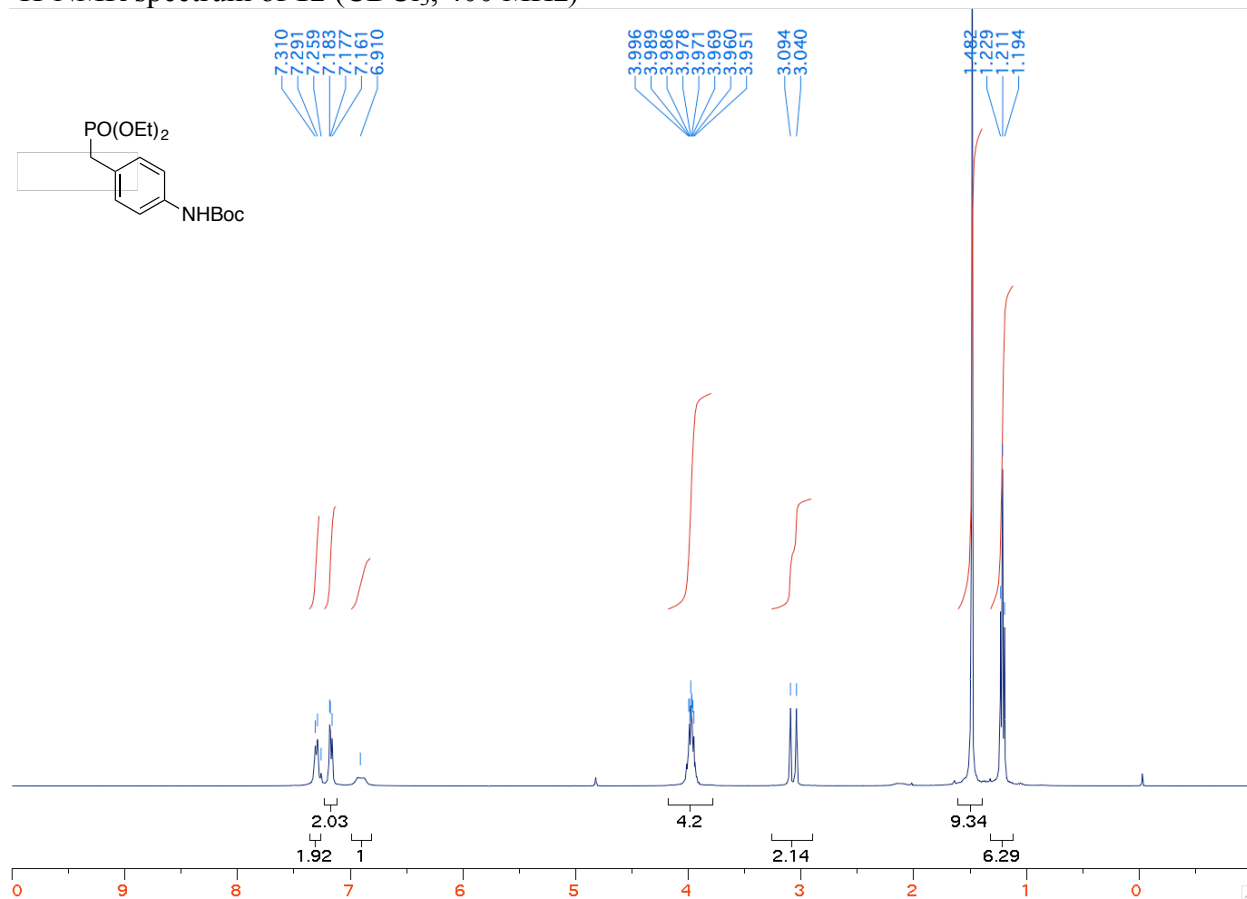

<sup>13</sup>C-NMR spectrum of **12** (CDCl<sub>3</sub>, 100 MHz)

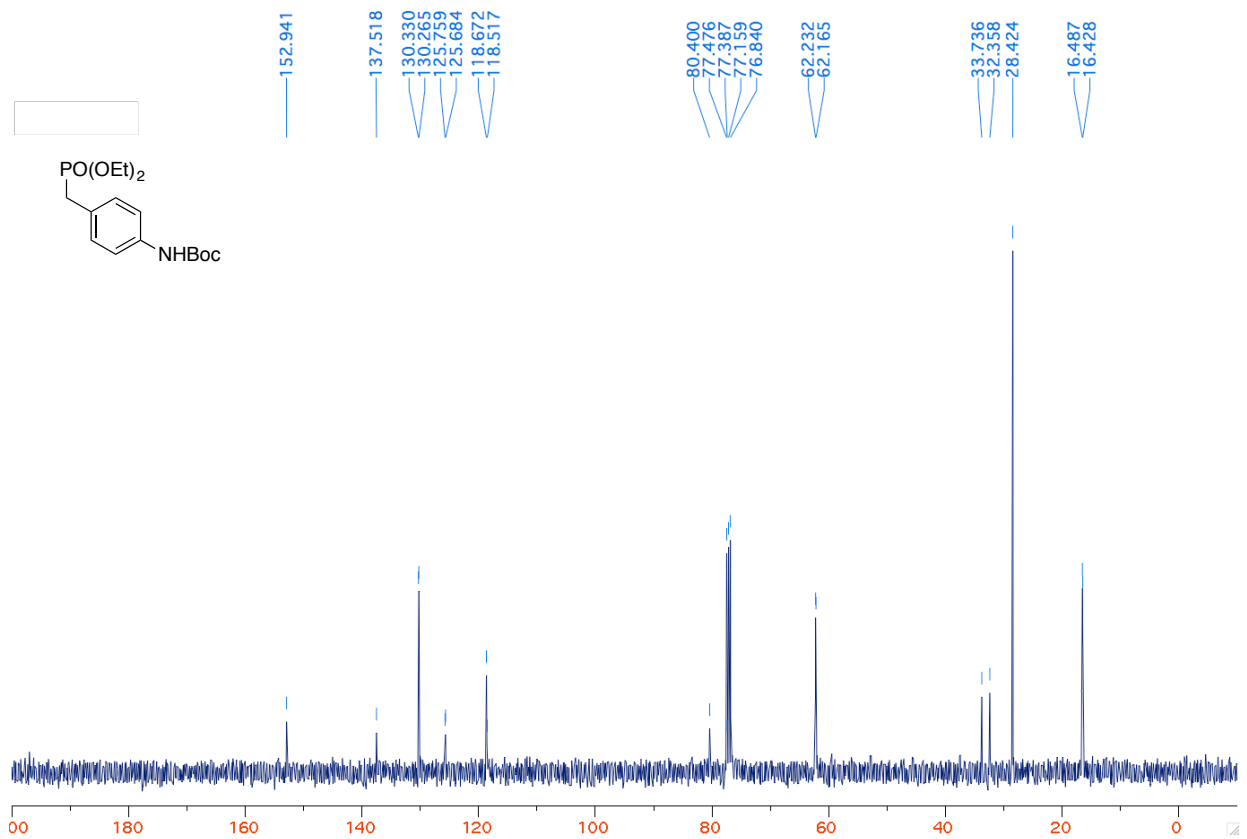

DEPT 135 spectrum of **12** (CDCl<sub>3</sub>, 100 MHz)

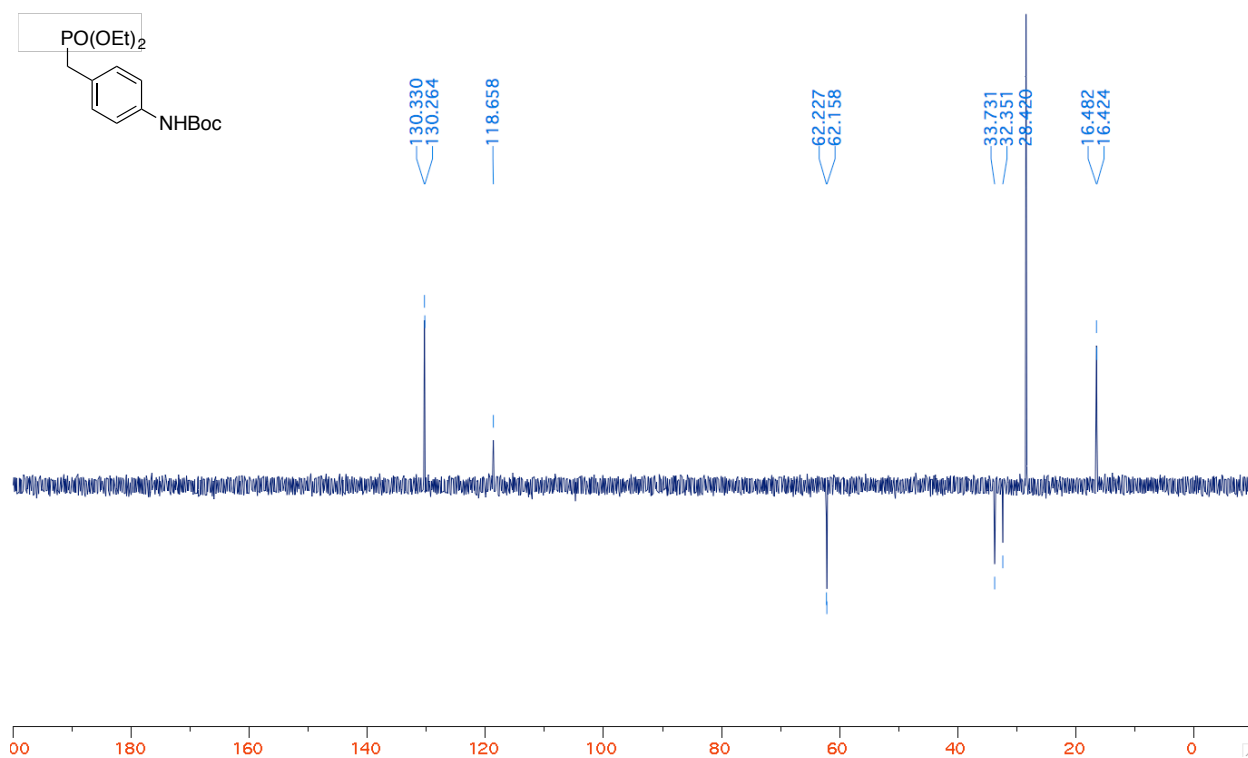

<sup>1</sup>H-NMR spectrum of **13** (CDCl<sub>3</sub>, 400 MHz)

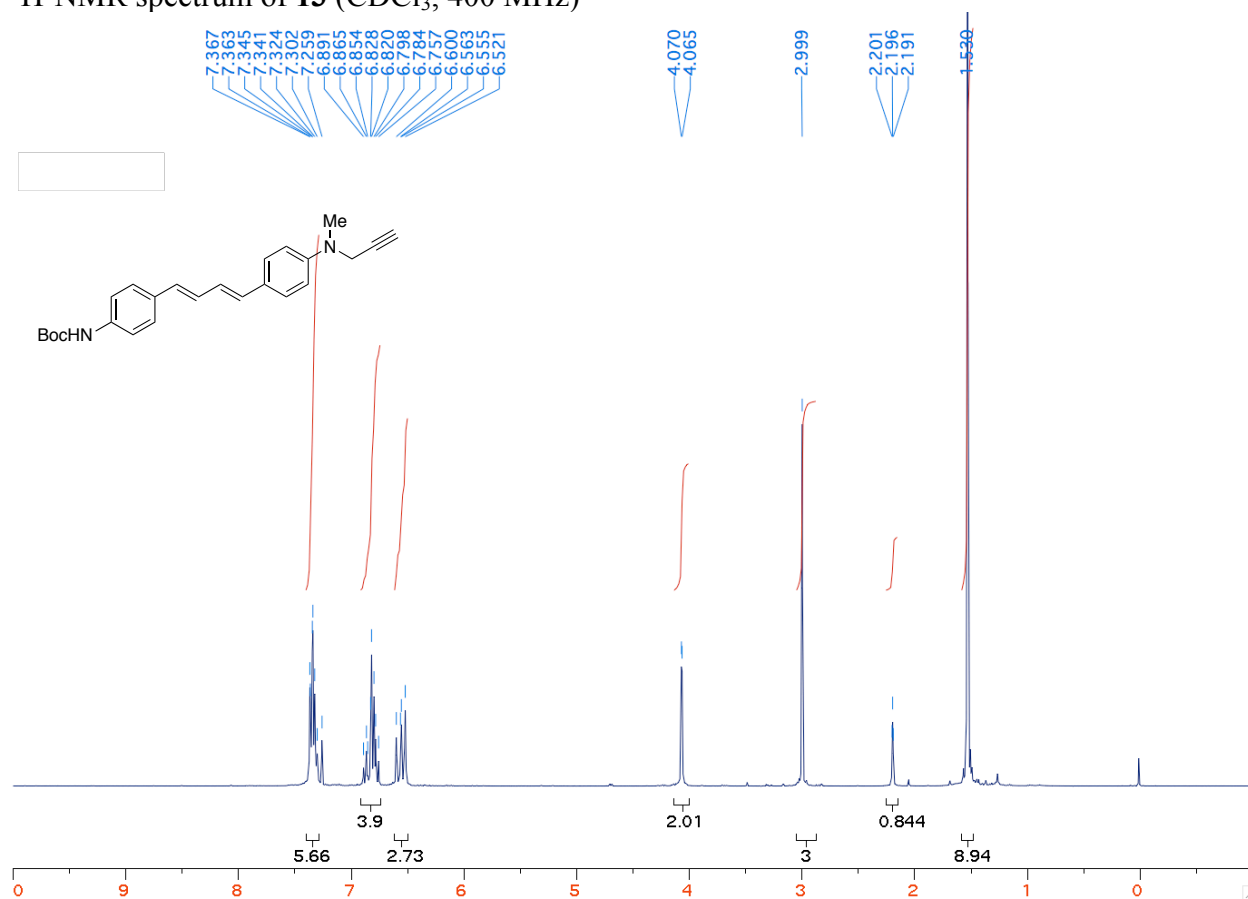

$^{13}\text{C}$ -NMR spectrum of **13** ( $\text{CDCl}_3$ , 100 MHz)

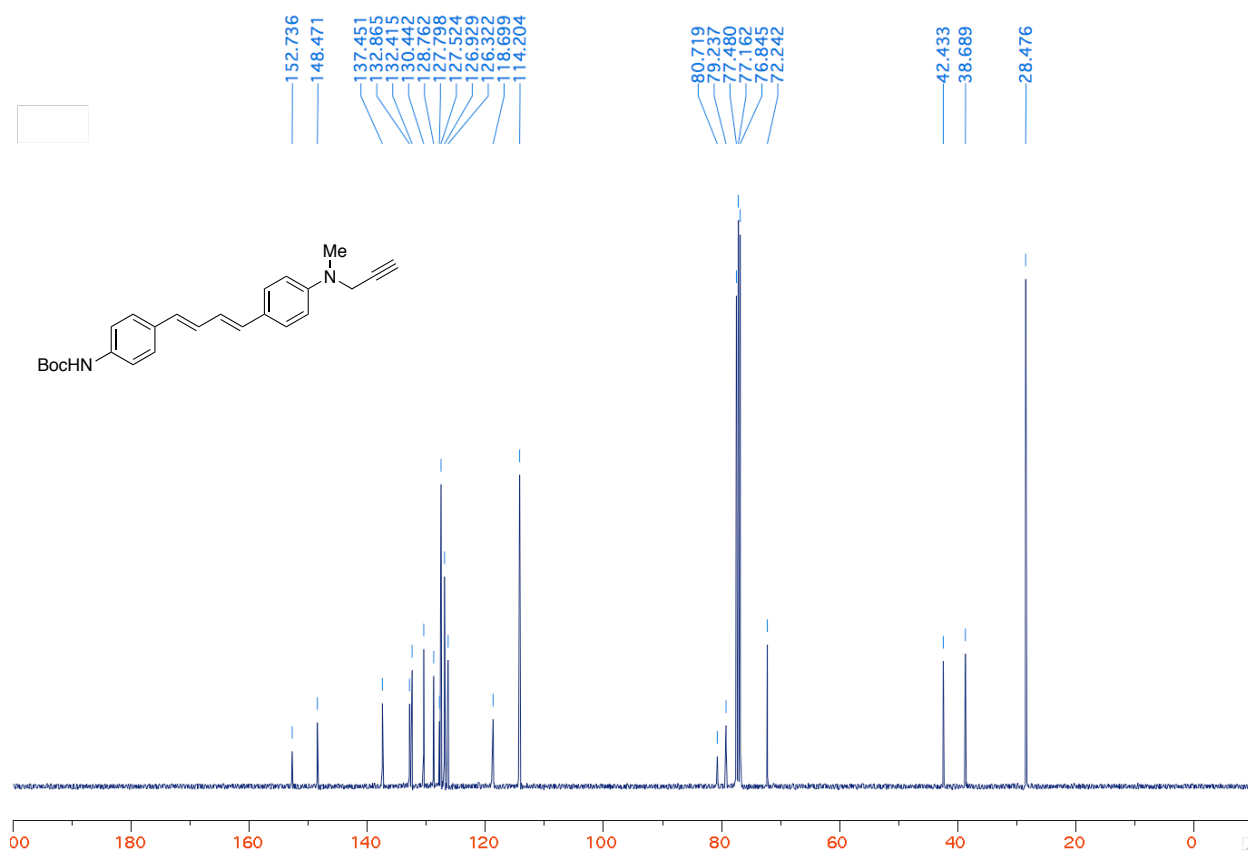

DEPT 135 spectrum of **13** ( $\text{CDCl}_3$ , 100 MHz)

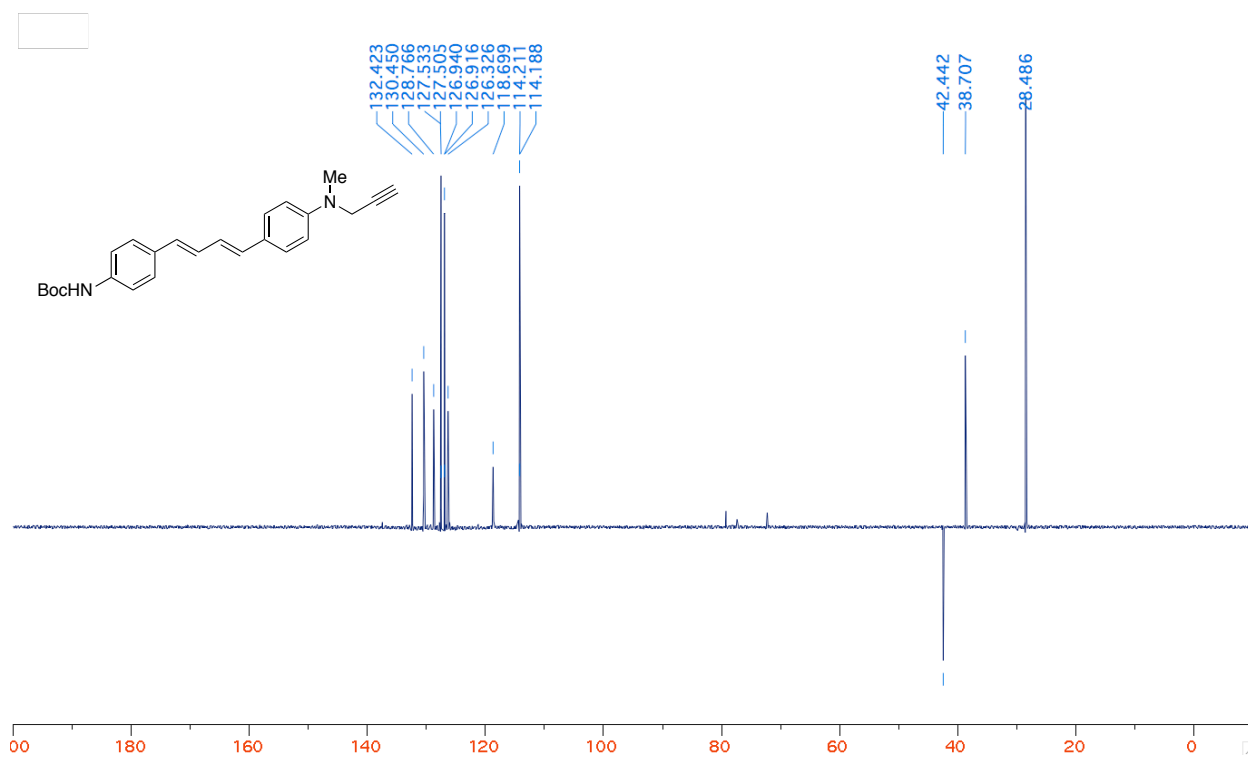

<sup>1</sup>H-NMR spectrum of **14** (CDCl<sub>3</sub>, 400 MHz)

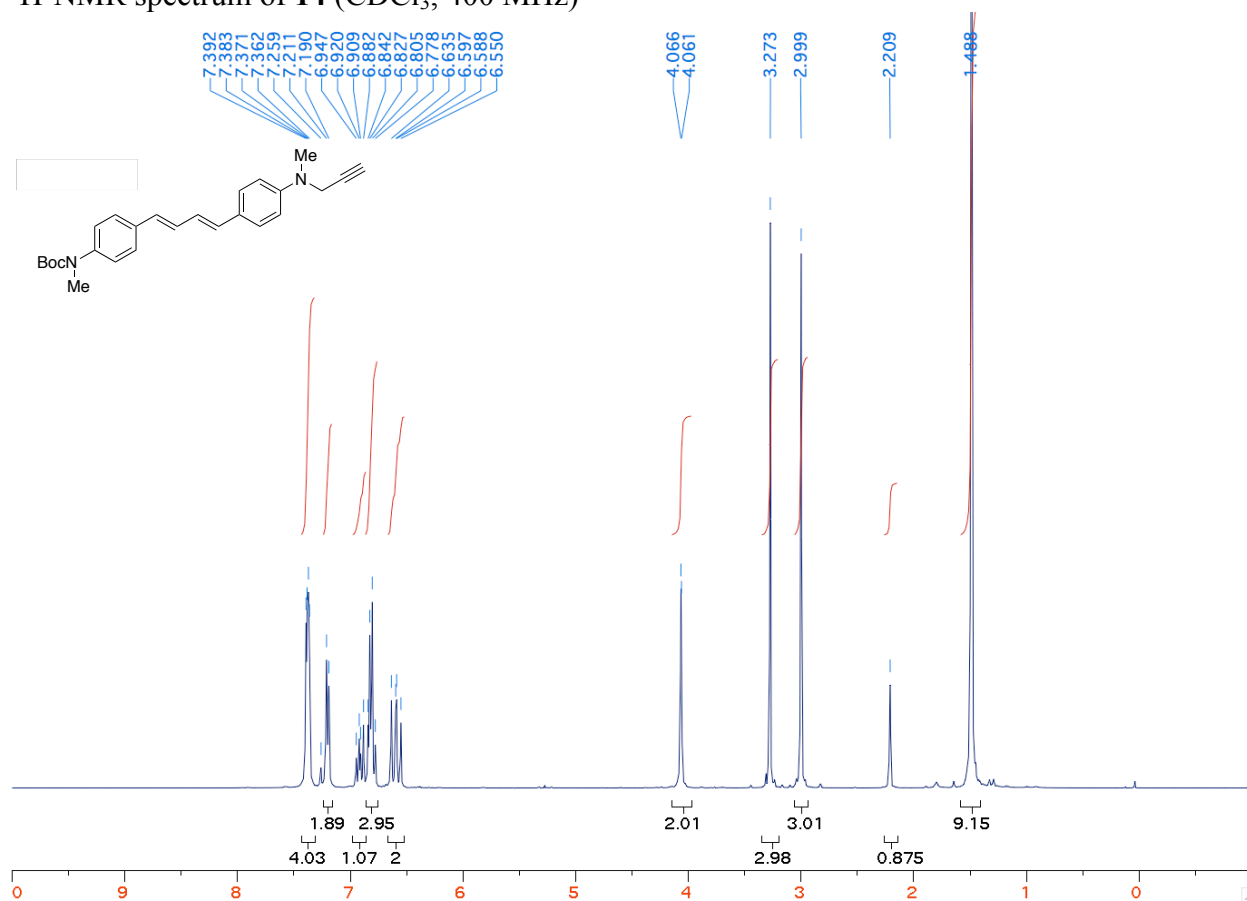

<sup>13</sup>C-NMR spectrum of **14** (CDCl<sub>3</sub>, 100 MHz)

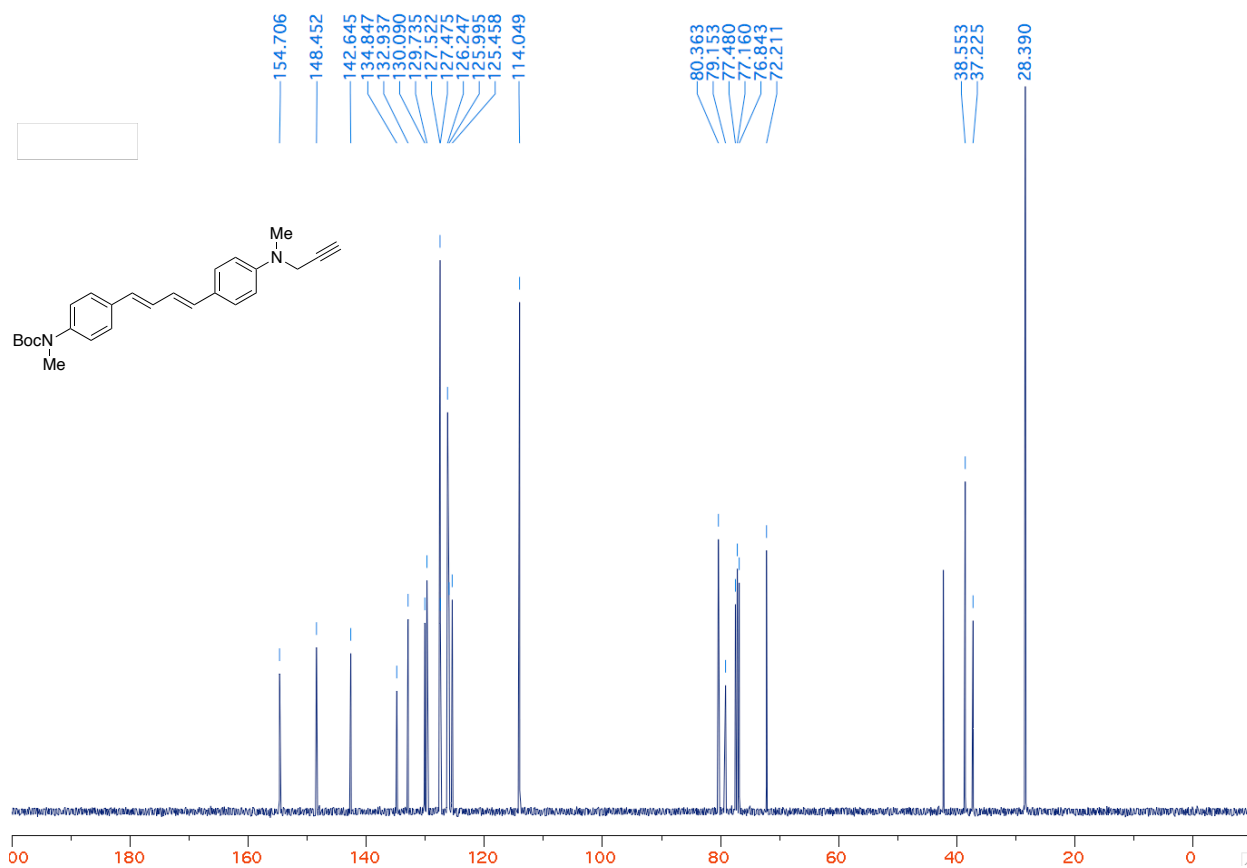

DEPT 135 spectrum of **14** (CDCl<sub>3</sub>, 100 MHz)

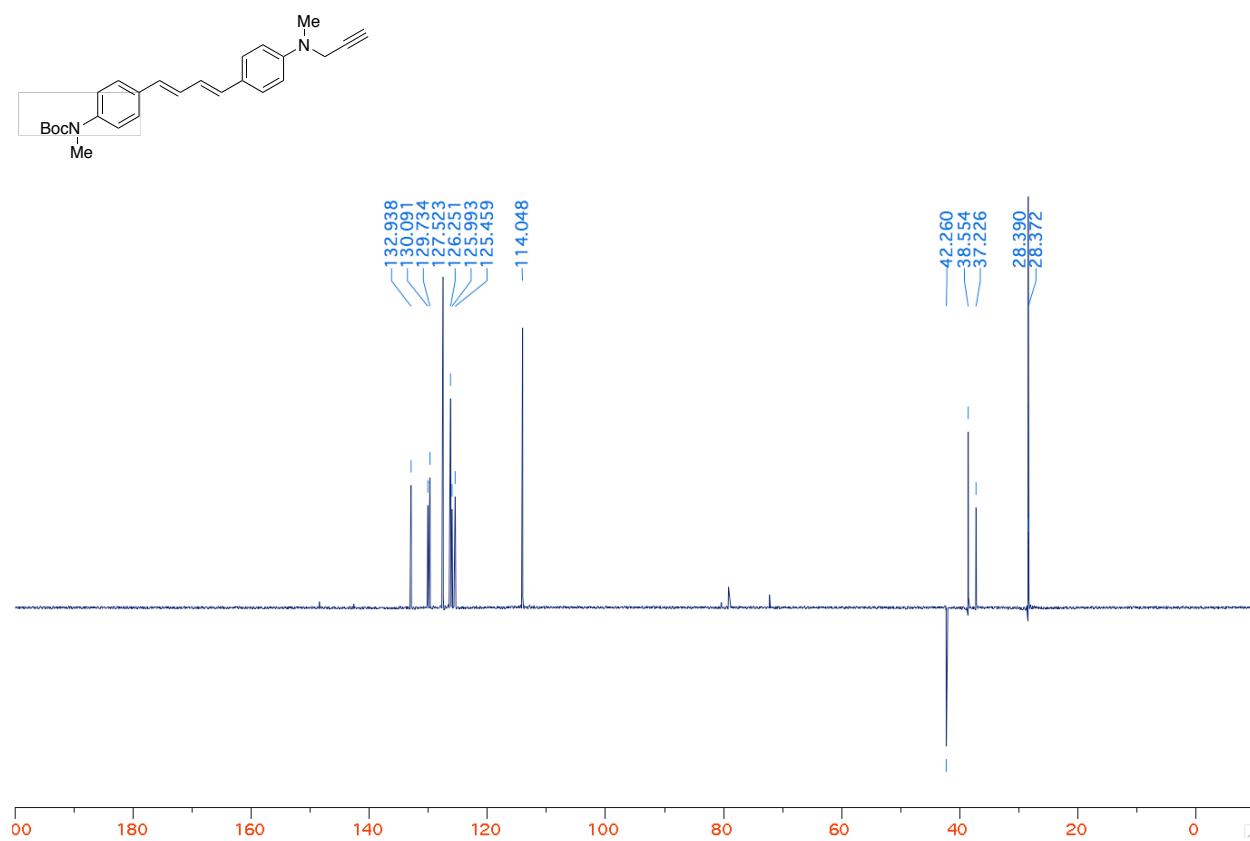

<sup>1</sup>H-NMR spectrum of **15** (CDCl<sub>3</sub>, 400 MHz)

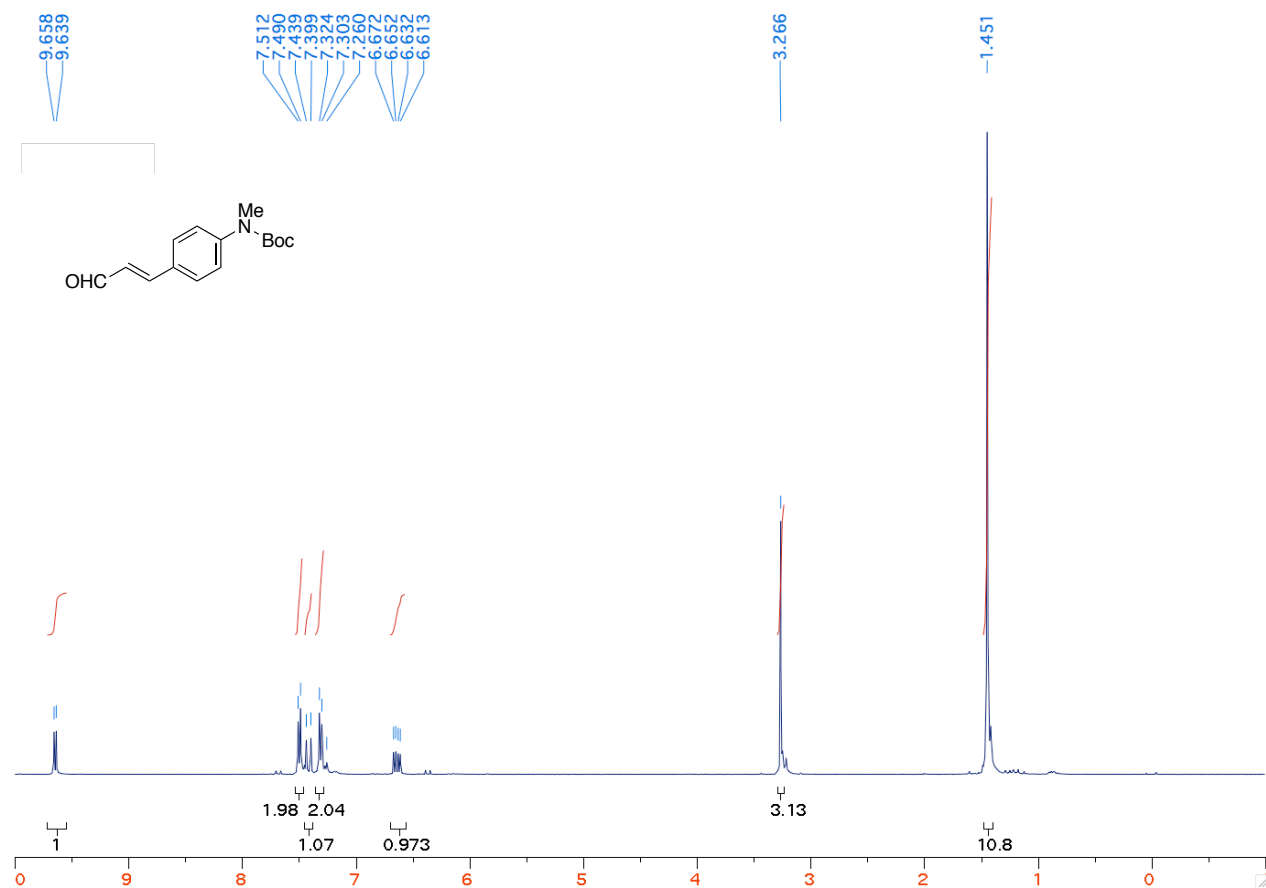



$^{13}\text{C}$ -NMR spectrum of **15** ( $\text{CDCl}_3$ , 100 MHz)

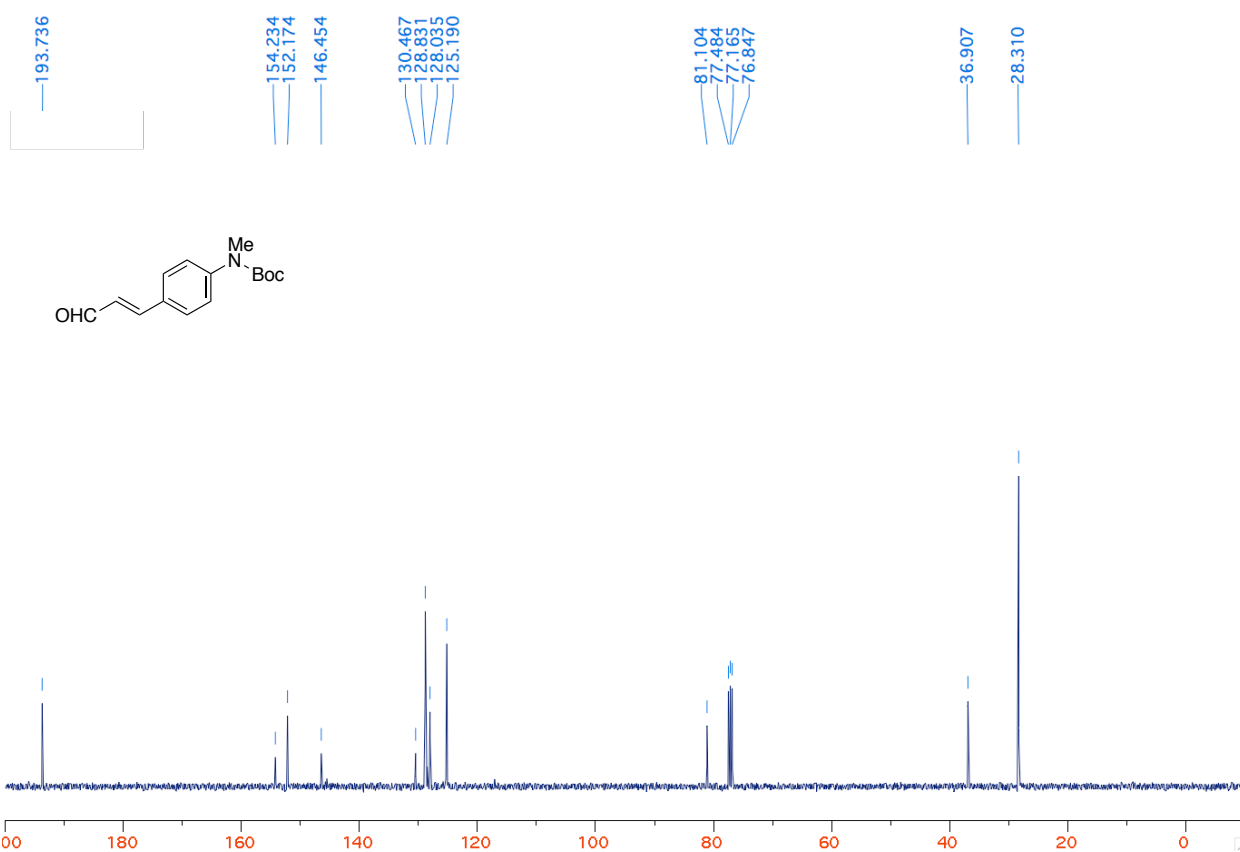

DEPT 135 spectrum of **15** ( $\text{CDCl}_3$ , 100 MHz)

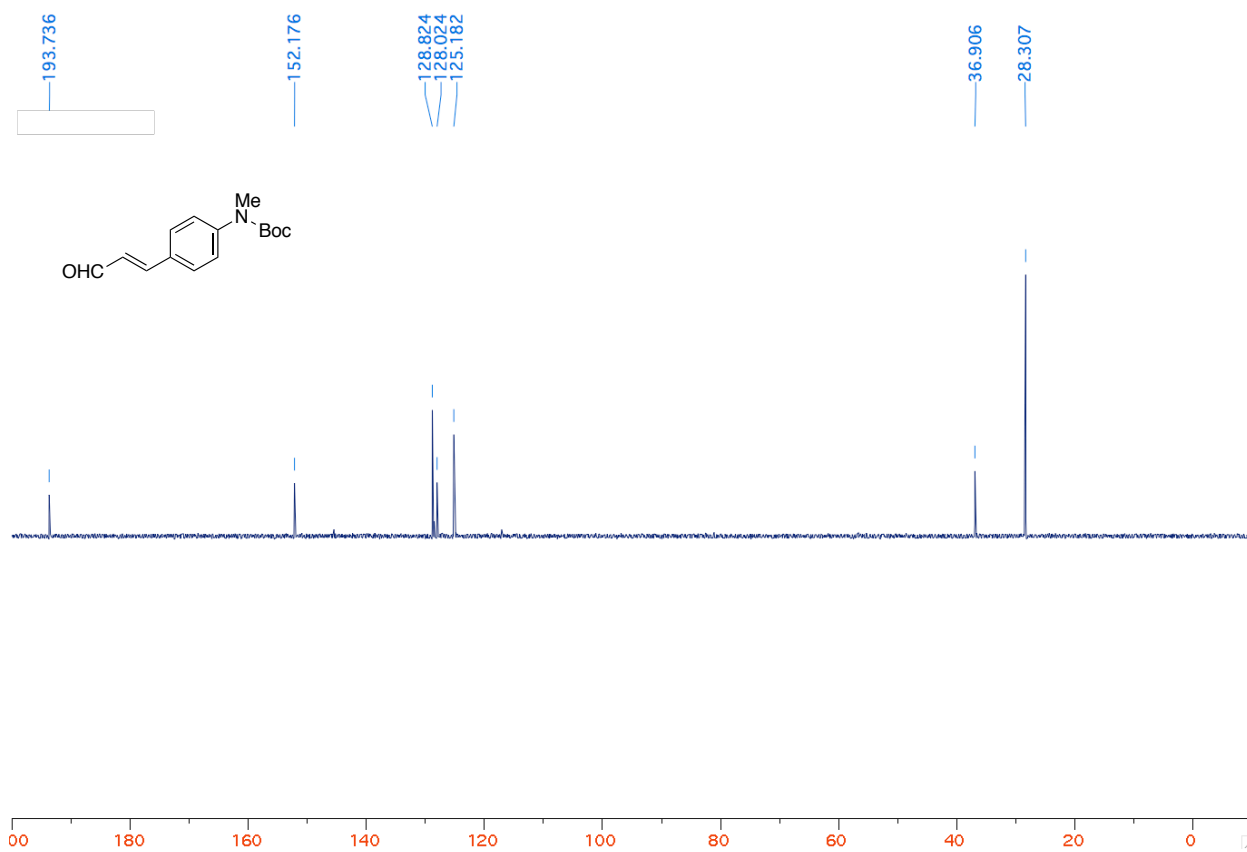

<sup>1</sup>H-NMR spectrum of **16** (CDCl<sub>3</sub>, 400 MHz)

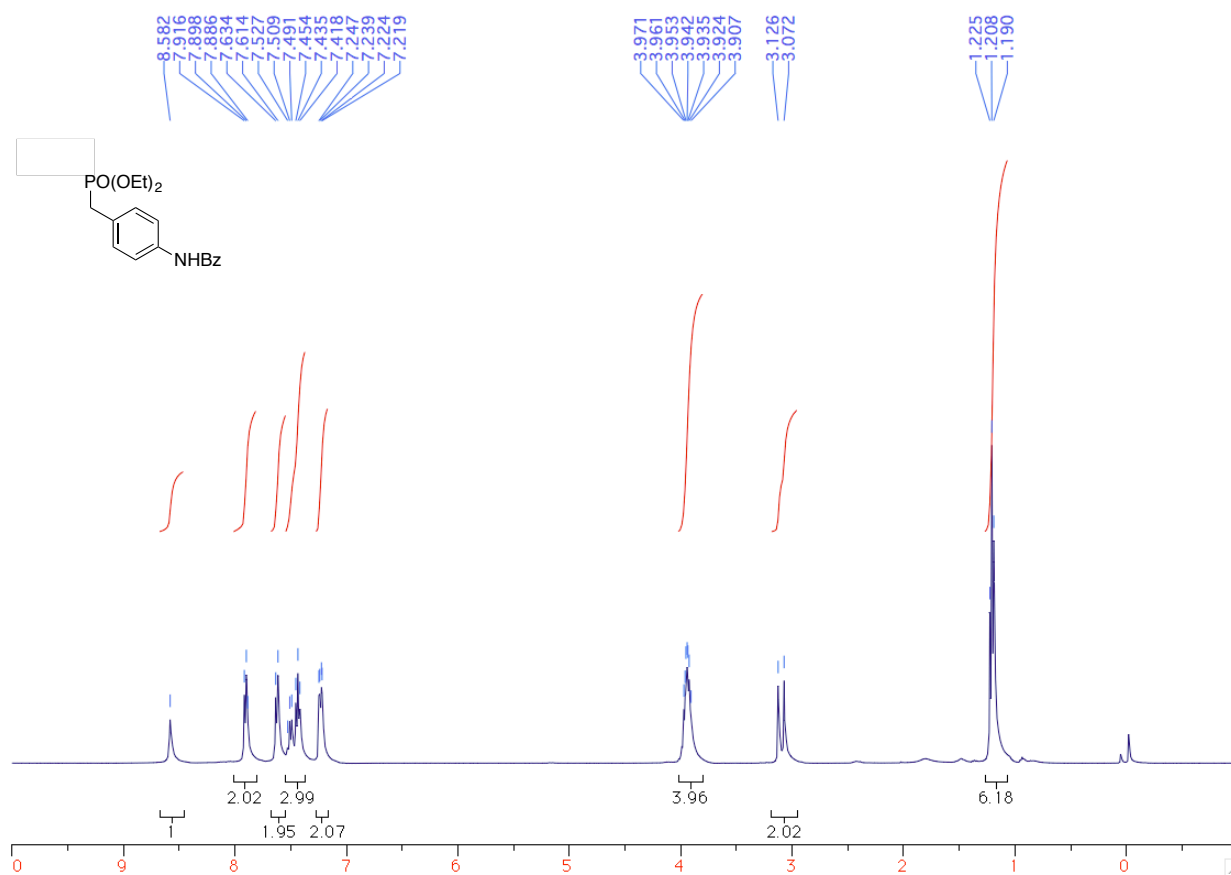

<sup>13</sup>C-NMR spectrum of **16** (CDCl<sub>3</sub>, 100 MHz)

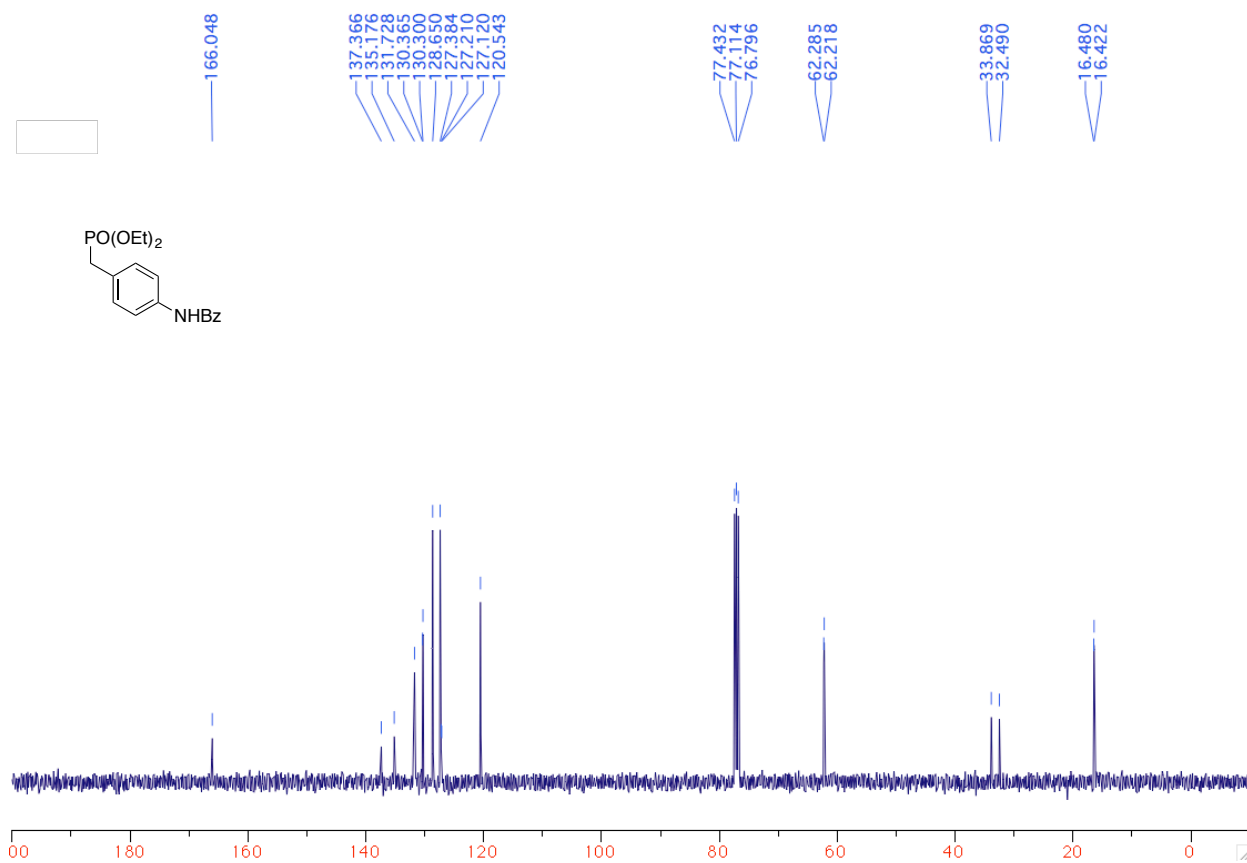

DEPT 135 spectrum of **16** (CDCl<sub>3</sub>, 100 MHz)

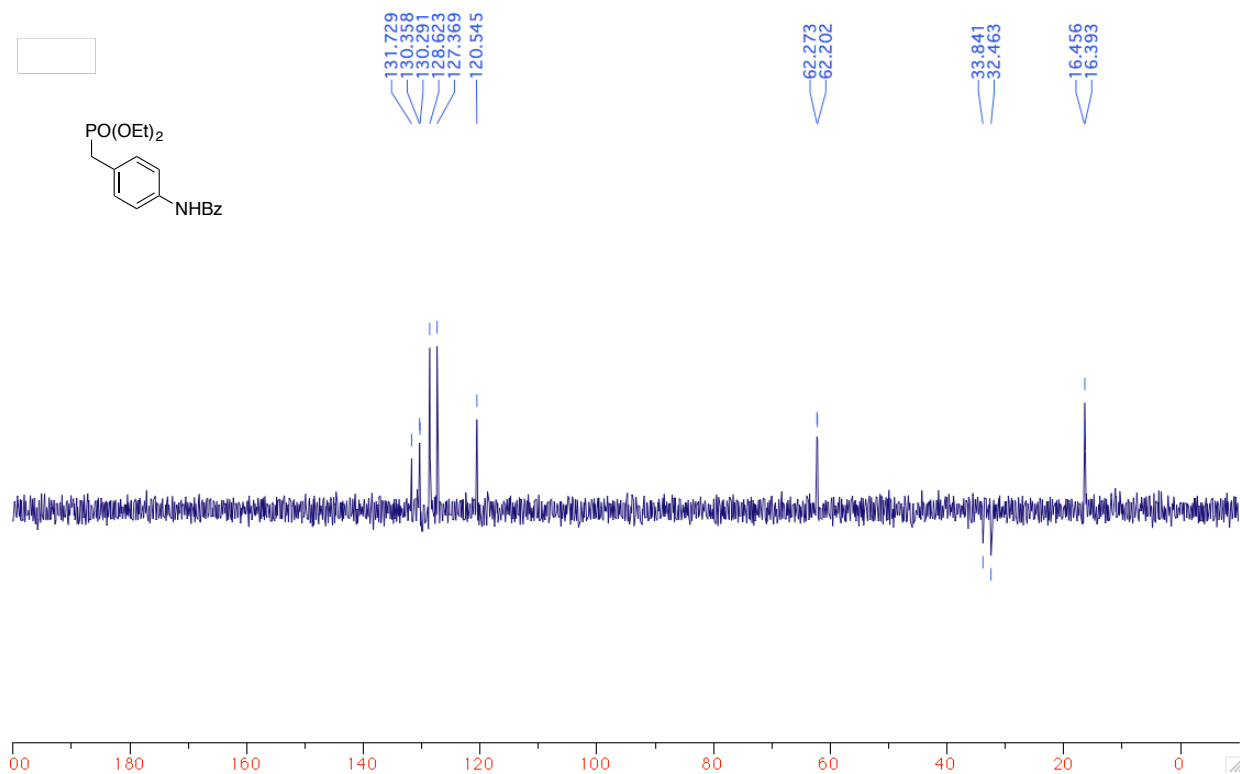

<sup>1</sup>H-NMR spectrum of **17** (DMSO-d<sub>6</sub>, 400 MHz)

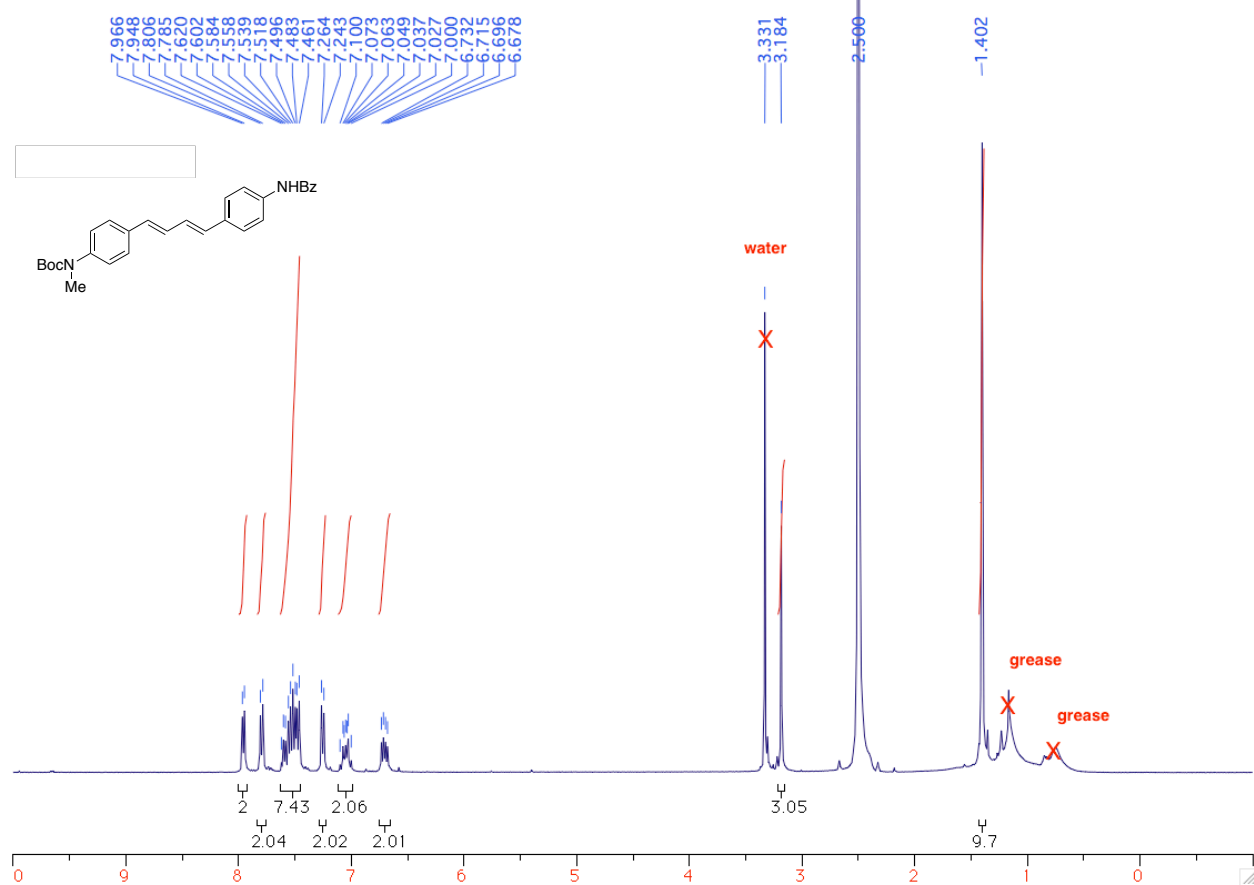

<sup>13</sup>C-NMR spectrum of **17** (CDCl<sub>3</sub>, 100 MHz)

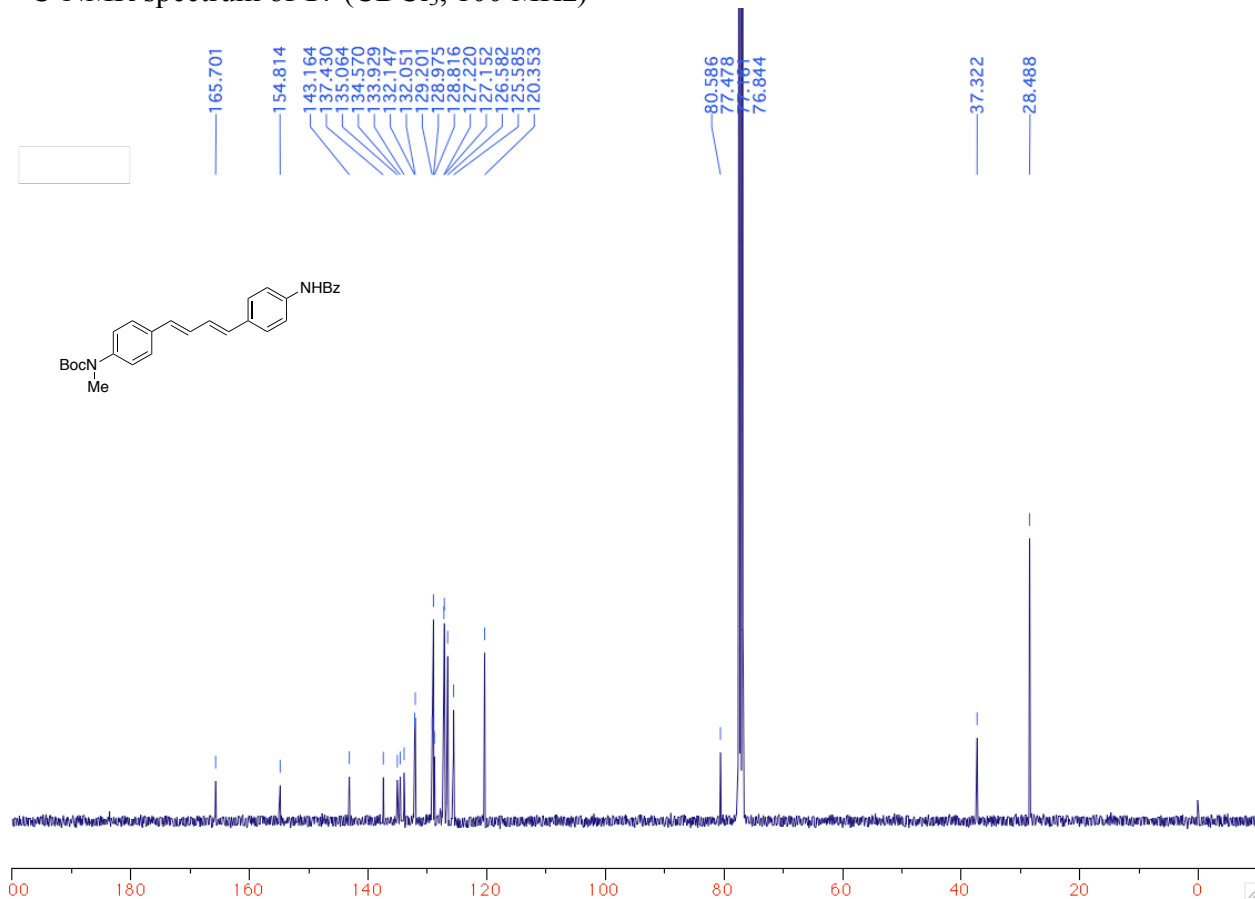

DEPT 135 spectrum of **17** (CDCl<sub>3</sub>, 100 MHz)

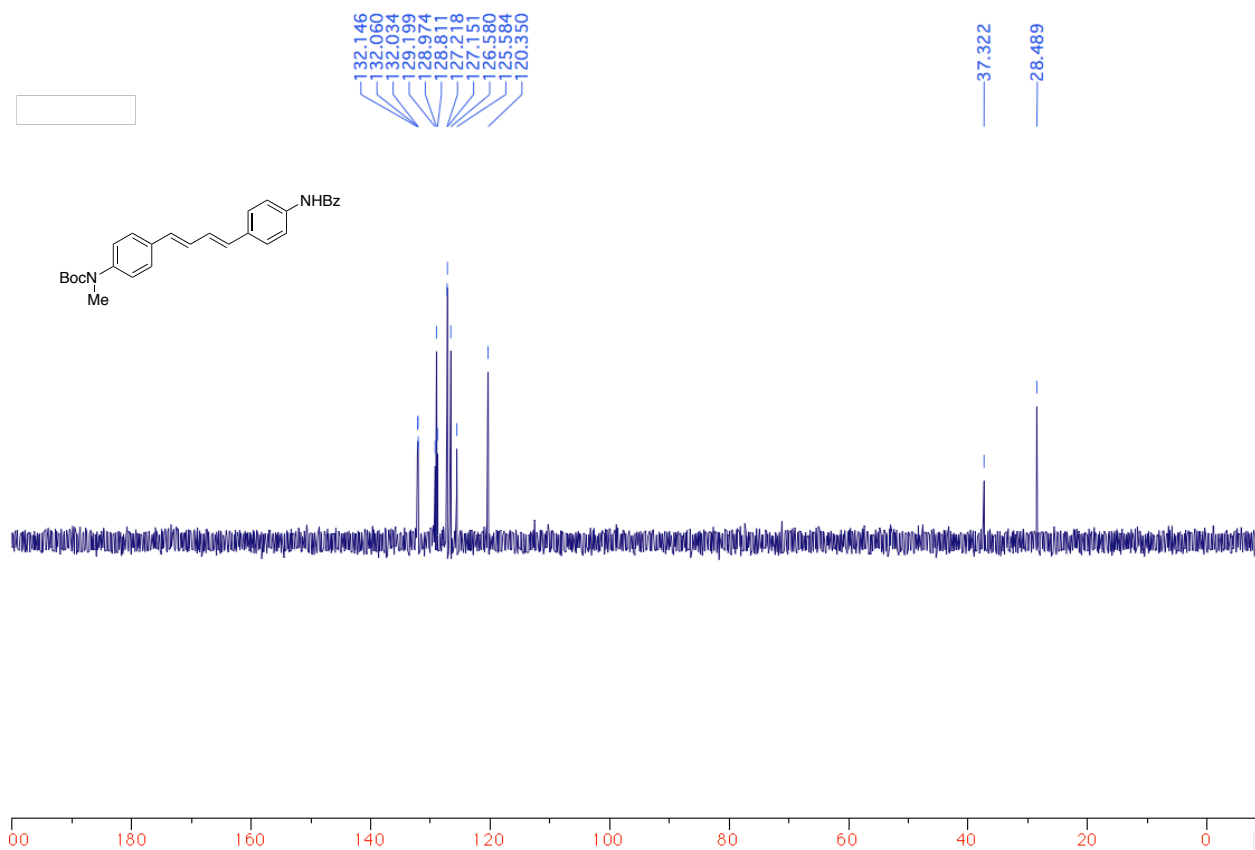

$^1\text{H-NMR}$  spectrum of **18** ( $\text{CDCl}_3$ , 400 MHz)

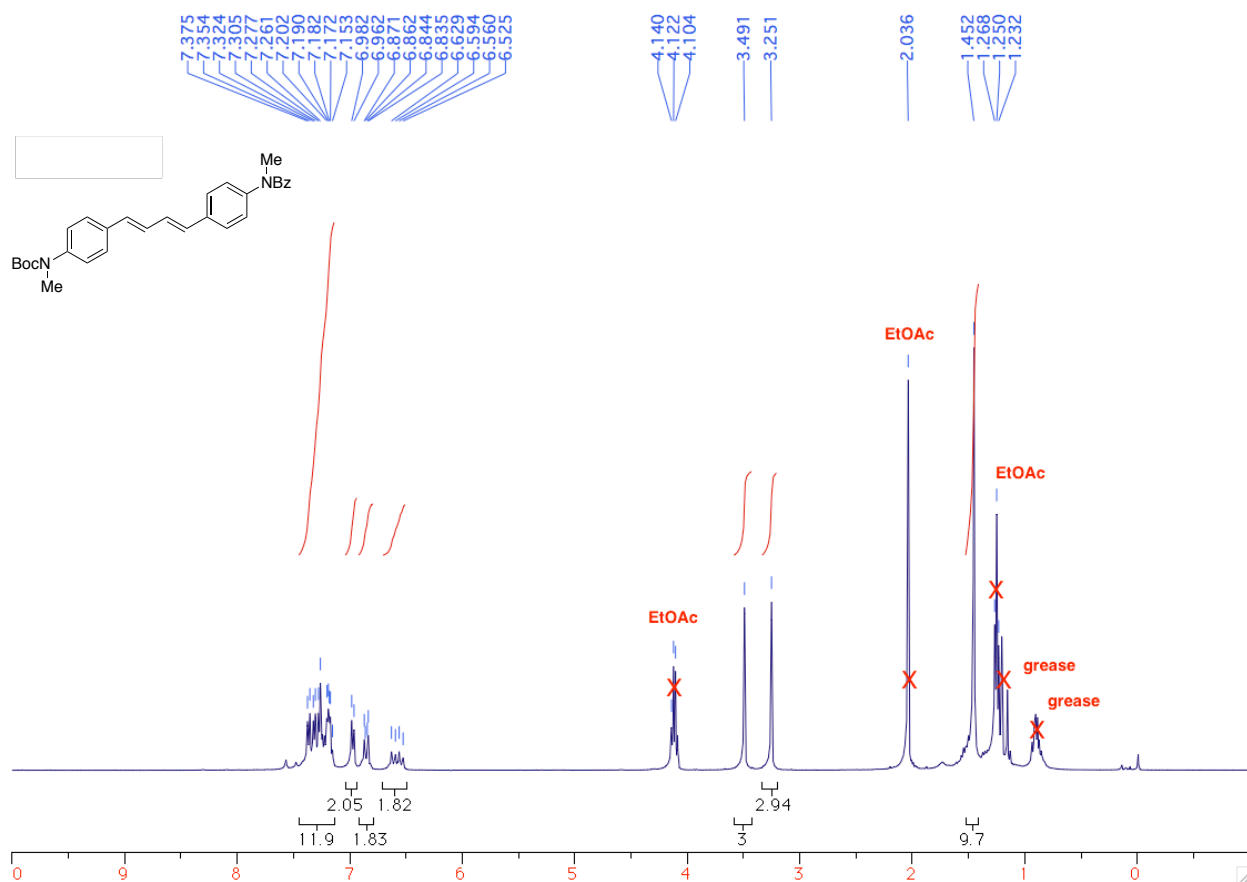

$^{13}\text{C-NMR}$  spectrum of **18** ( $\text{CDCl}_3$ , 100 MHz)

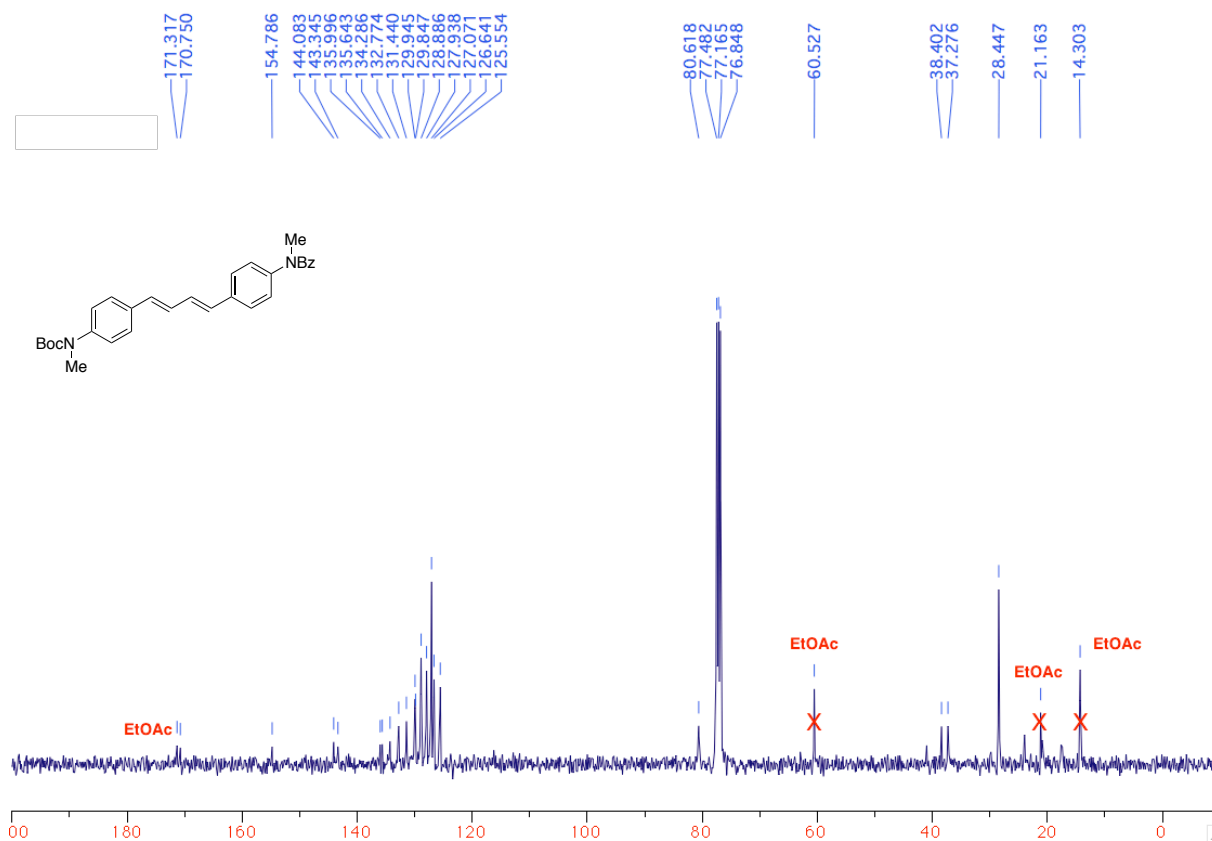

DEPT 135 spectrum of **18** (CDCl<sub>3</sub>, 100 MHz)

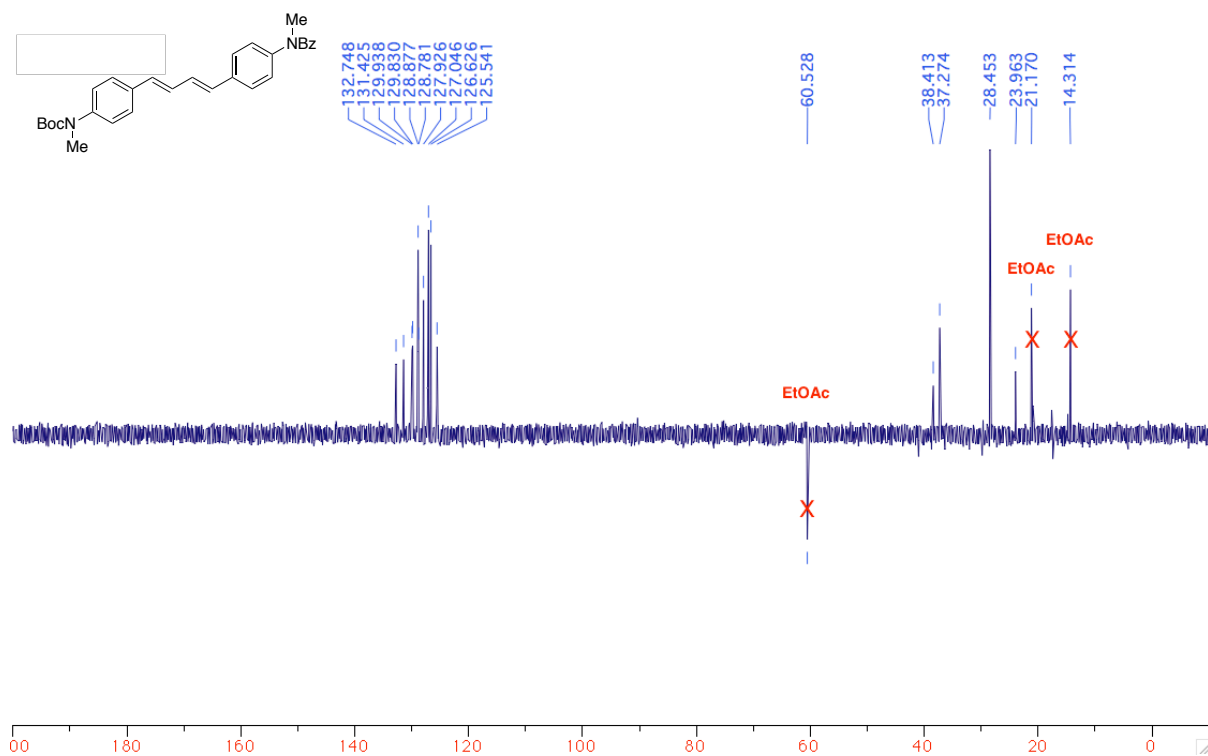

<sup>1</sup>H-NMR spectrum of **19** (CDCl<sub>3</sub>, 400 MHz)

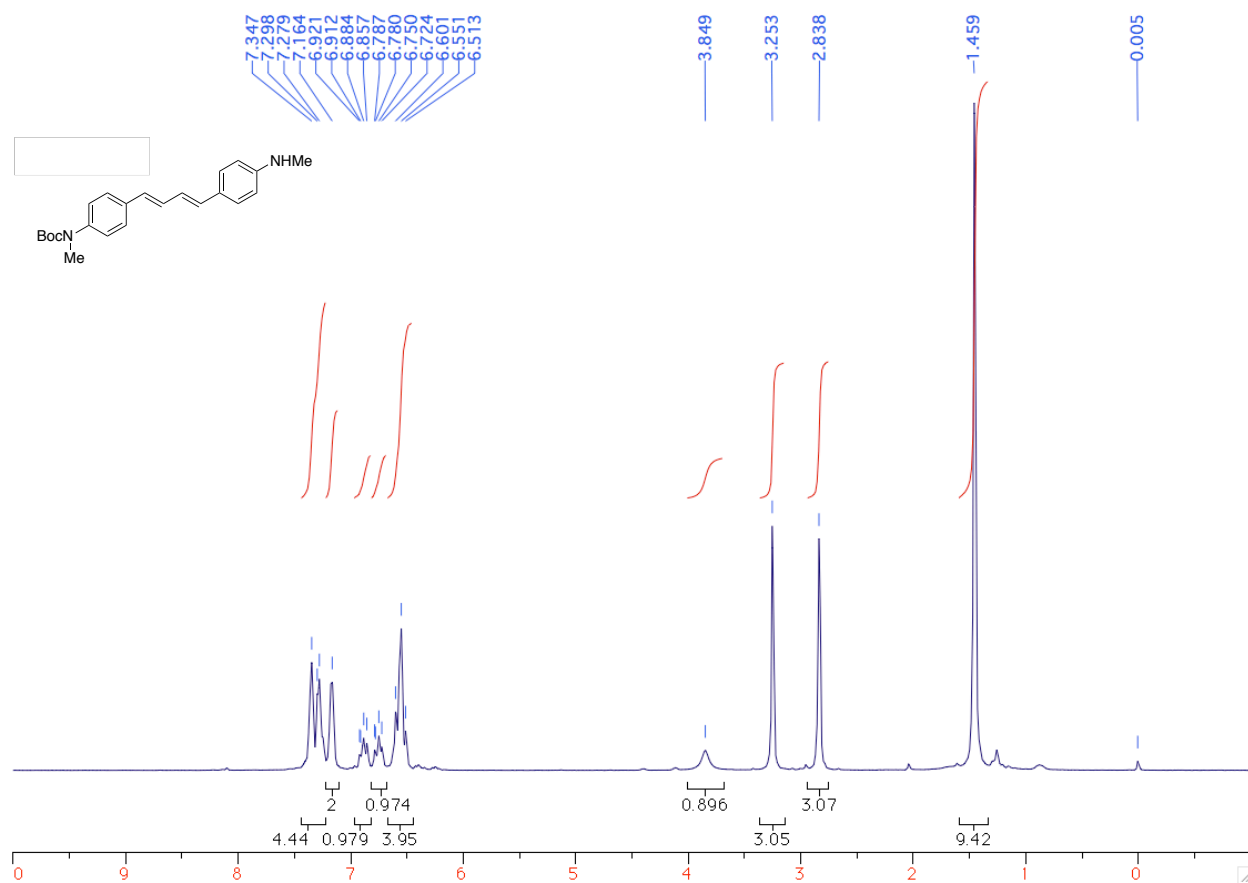

$^{13}\text{C}$ -NMR spectrum of **19** ( $\text{CDCl}_3$ , 100 MHz)

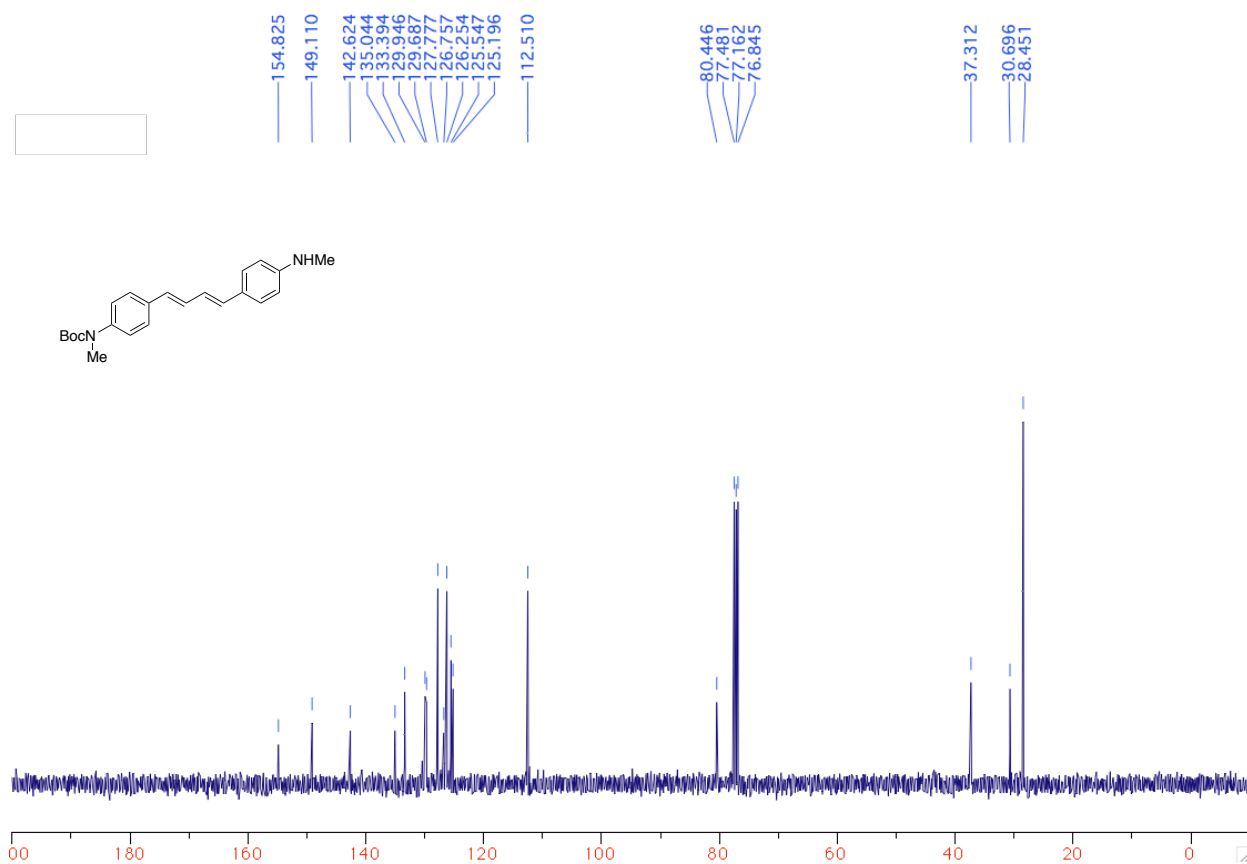

DEPT 135 spectrum of **19** ( $\text{CDCl}_3$ , 100 MHz)

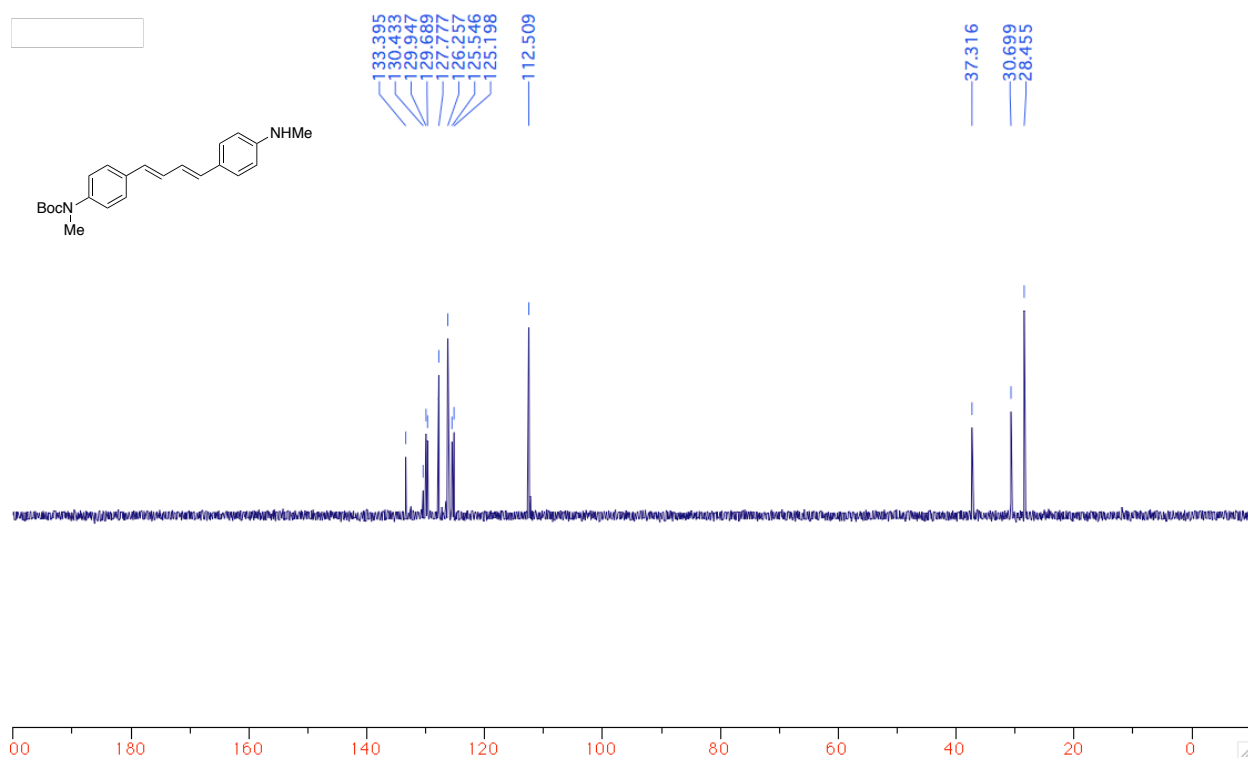

<sup>1</sup>H-NMR spectrum of **20** (CD<sub>3</sub>OD, 400 MHz)

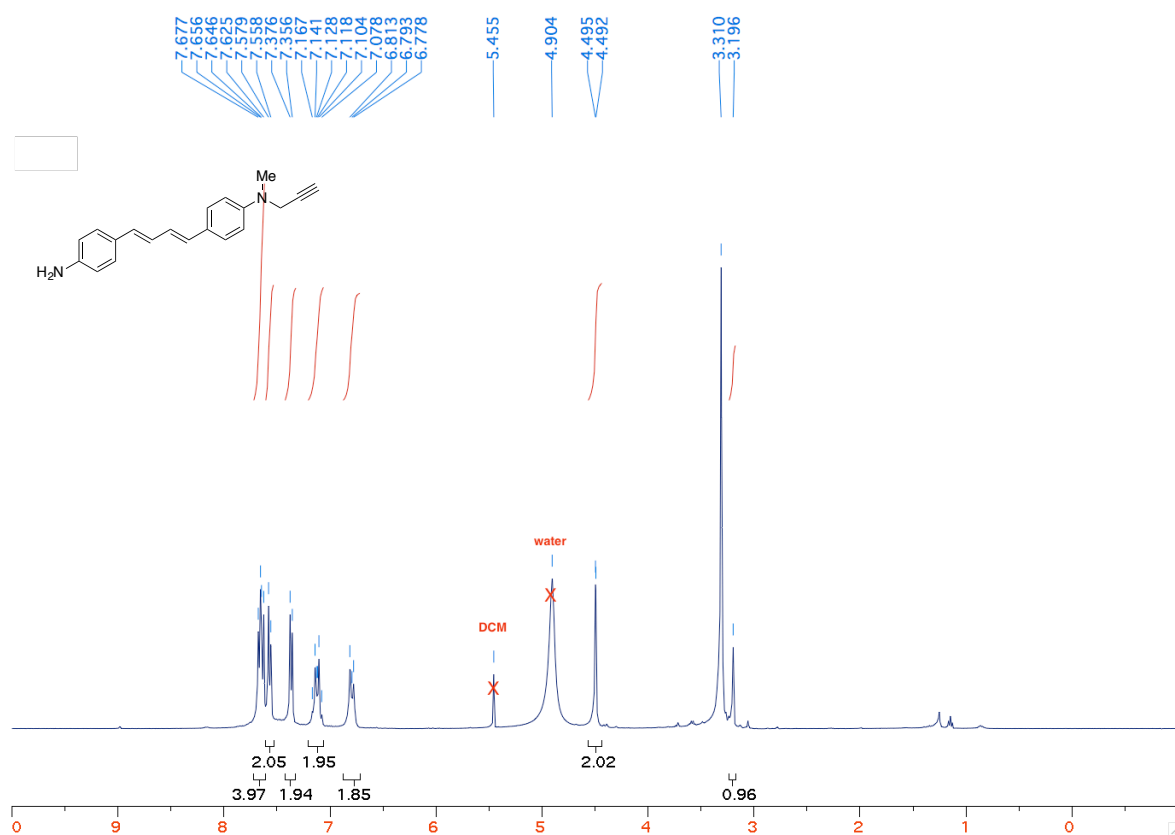

<sup>13</sup>C-NMR spectrum of **20** (CD<sub>3</sub>OD, 100 MHz)

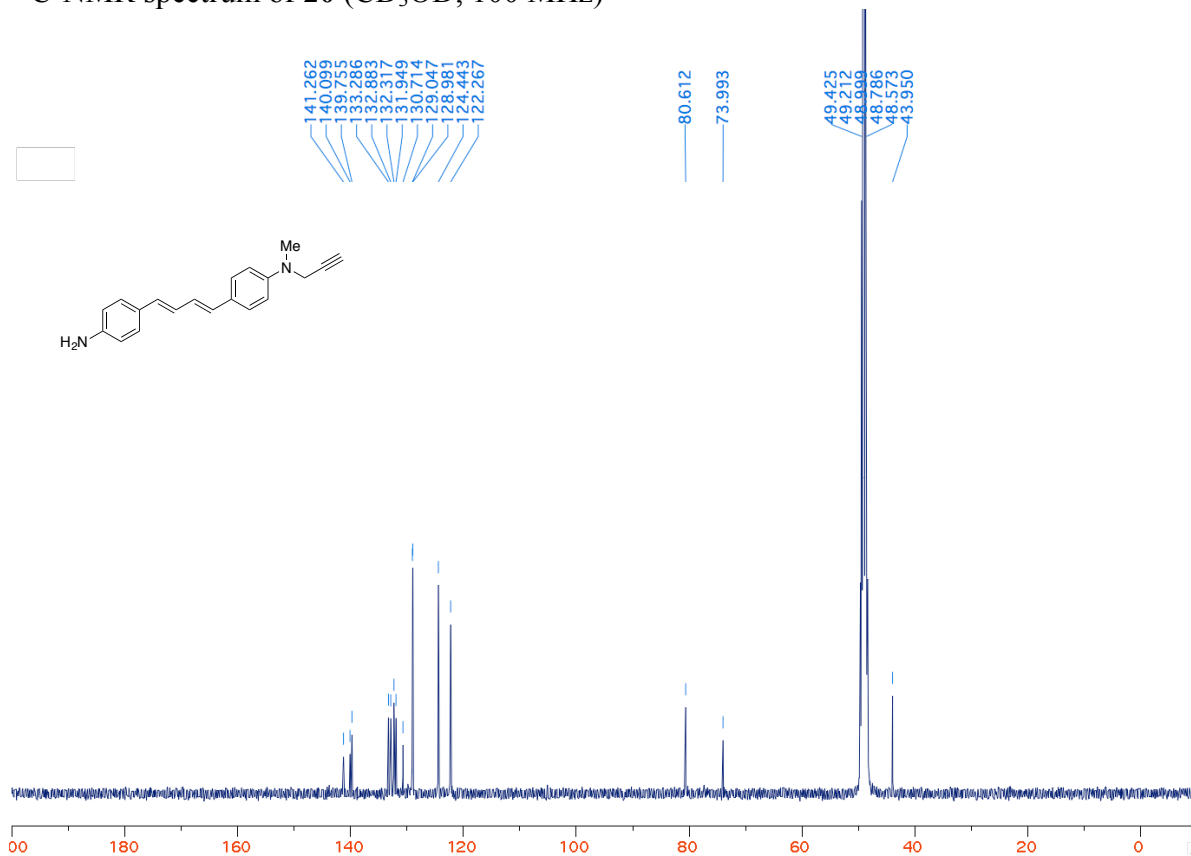



DEPT 135 spectrum of **20** (CD<sub>3</sub>OD, 100 MHz)

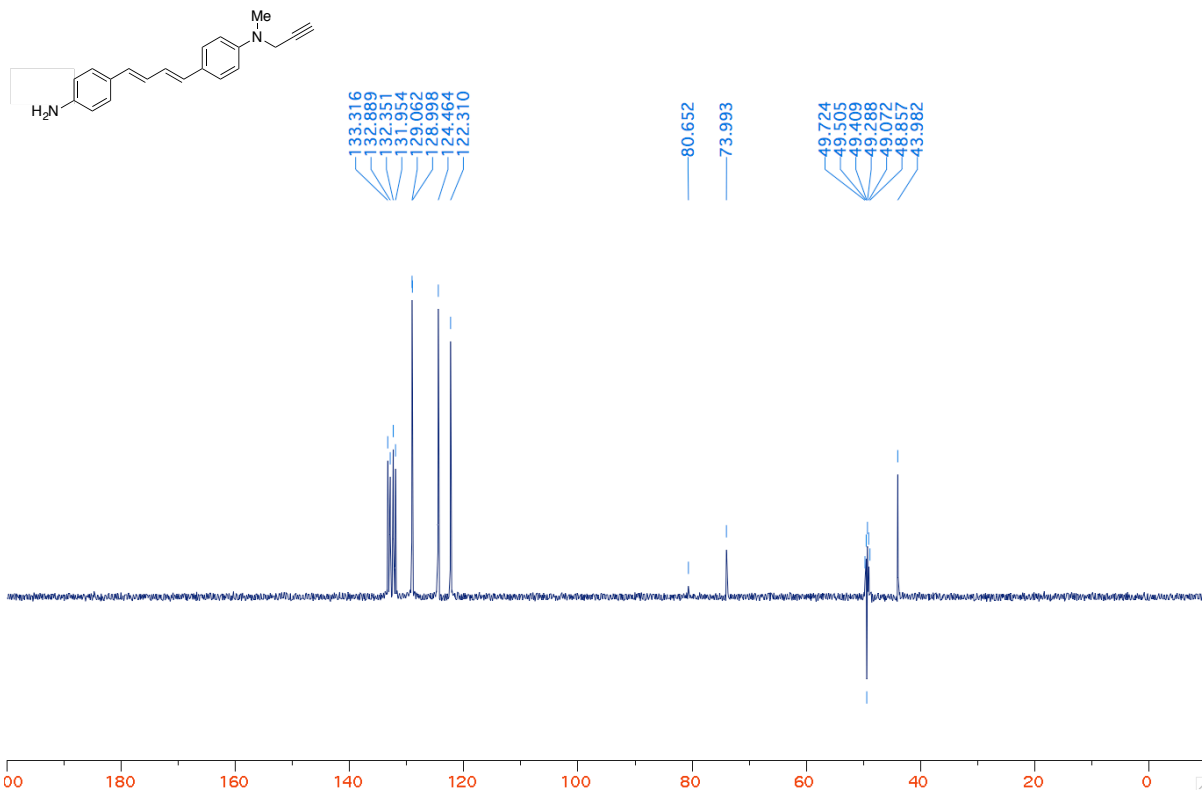

<sup>1</sup>H-NMR spectrum of **22** (CD<sub>3</sub>OD, 400 MHz)

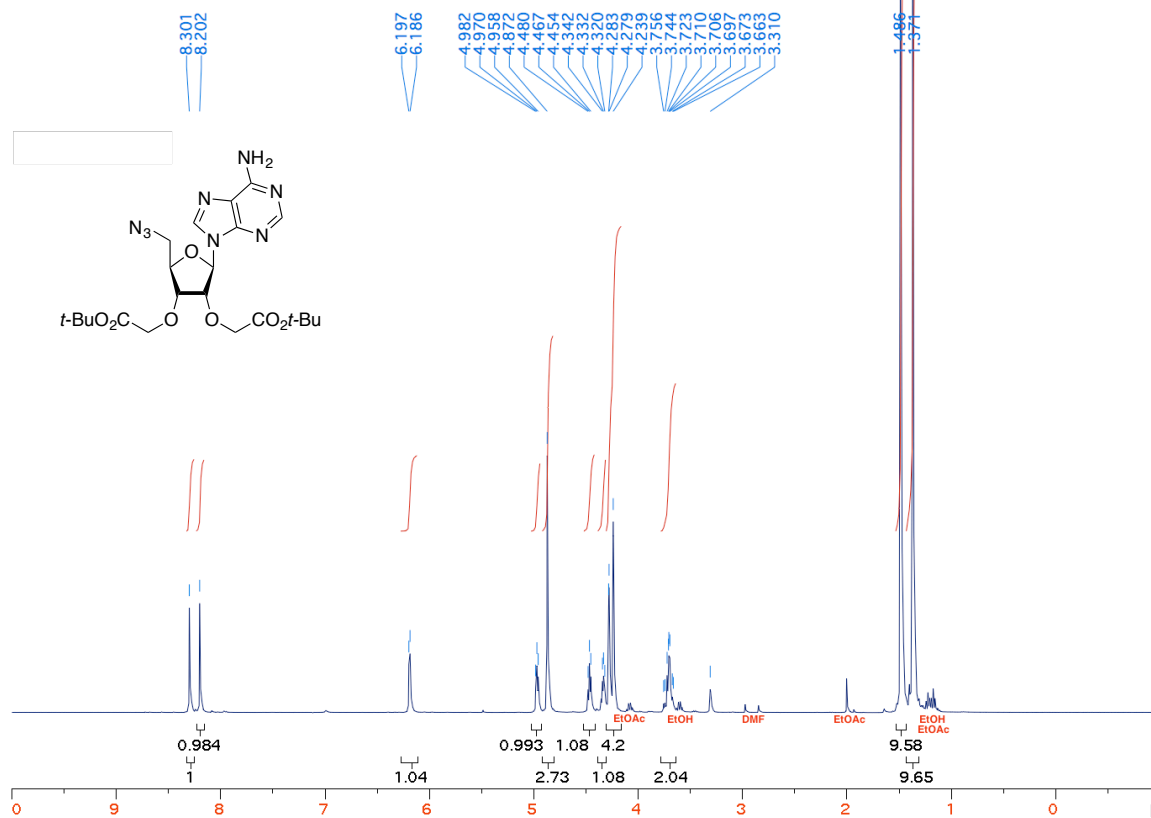

$^{13}\text{C}$ -NMR spectrum of **22** ( $\text{CD}_3\text{OD}$ , 100 MHz)

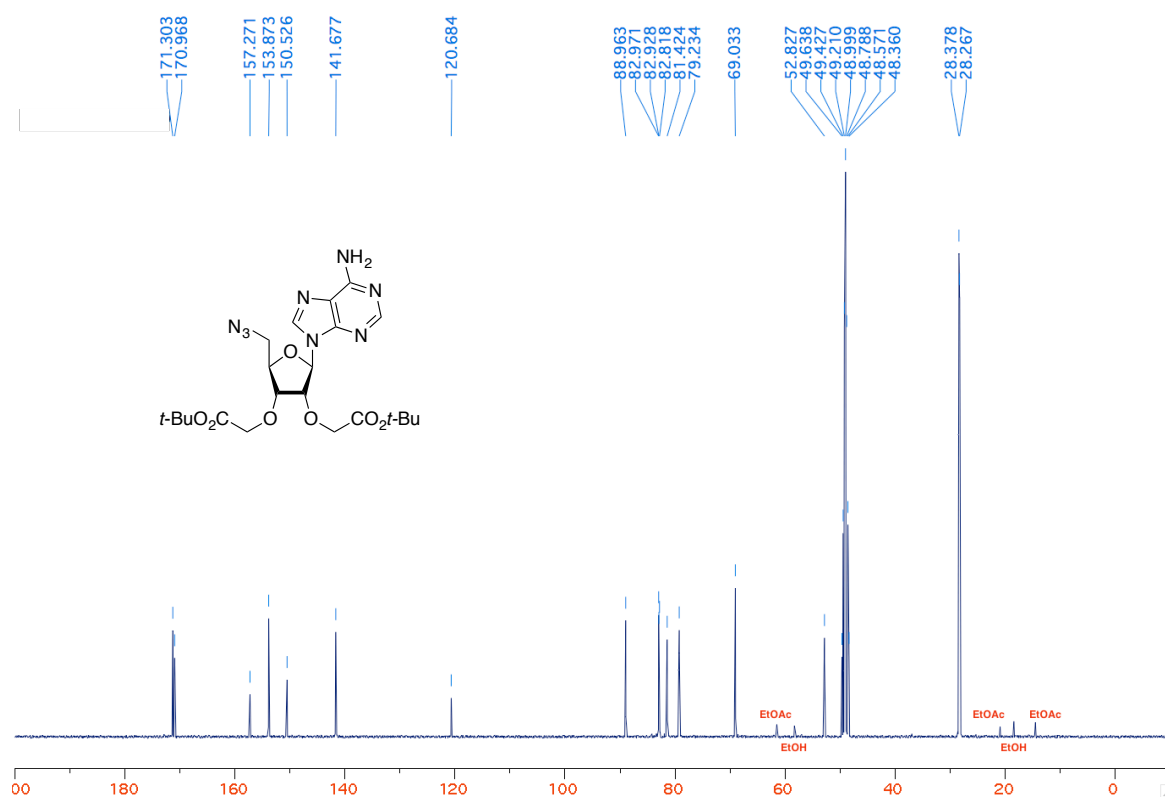

DEPT 135 spectrum of **22** ( $\text{CD}_3\text{OD}$ , 100 MHz)

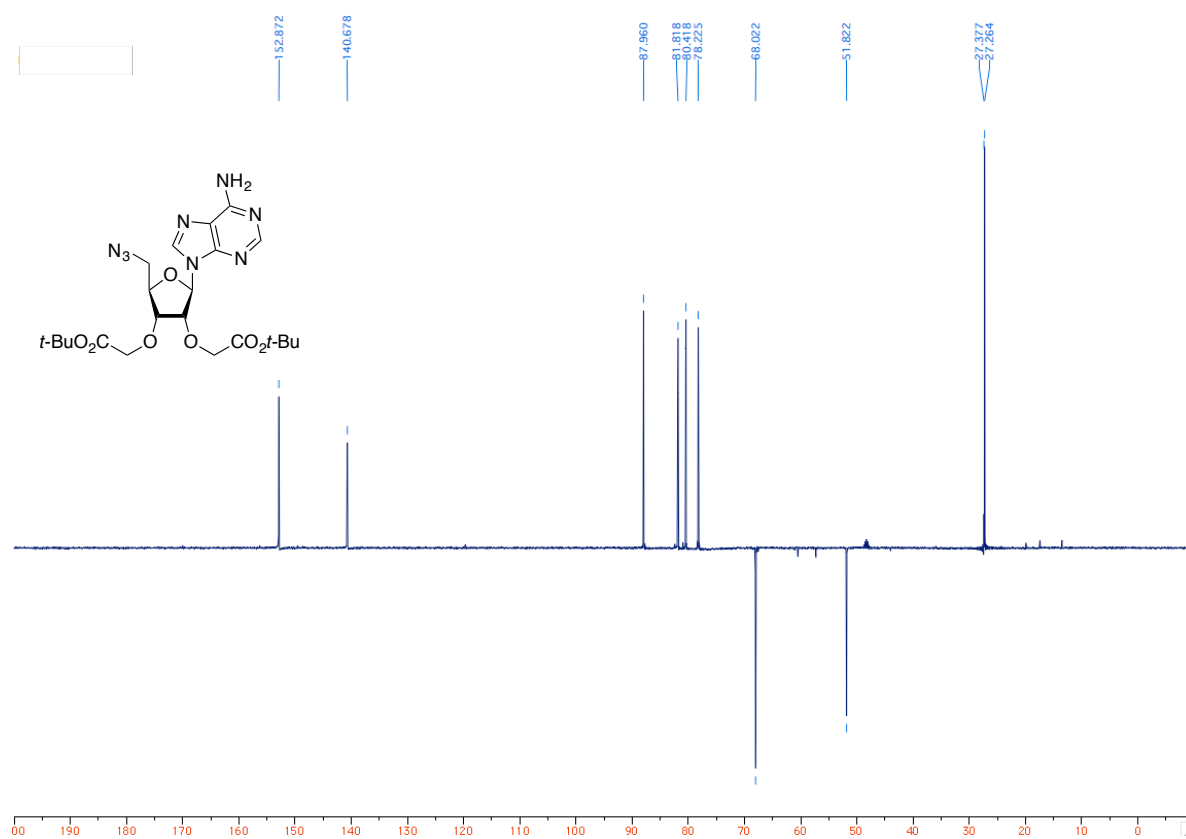

<sup>1</sup>H-NMR spectrum of **23** (CD<sub>3</sub>OD, 400 MHz)

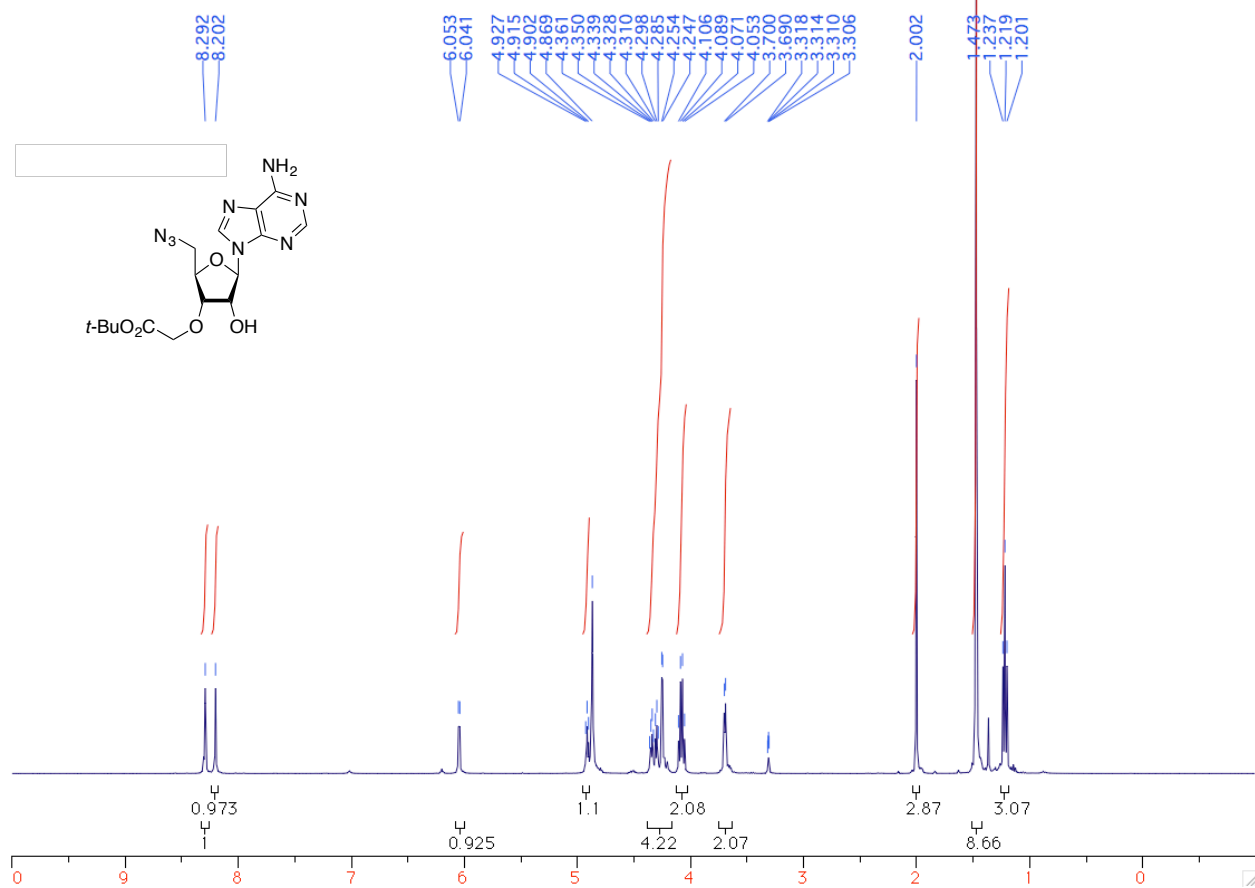

<sup>13</sup>C-NMR spectrum of **23** (CD<sub>3</sub>OD, 100 MHz)

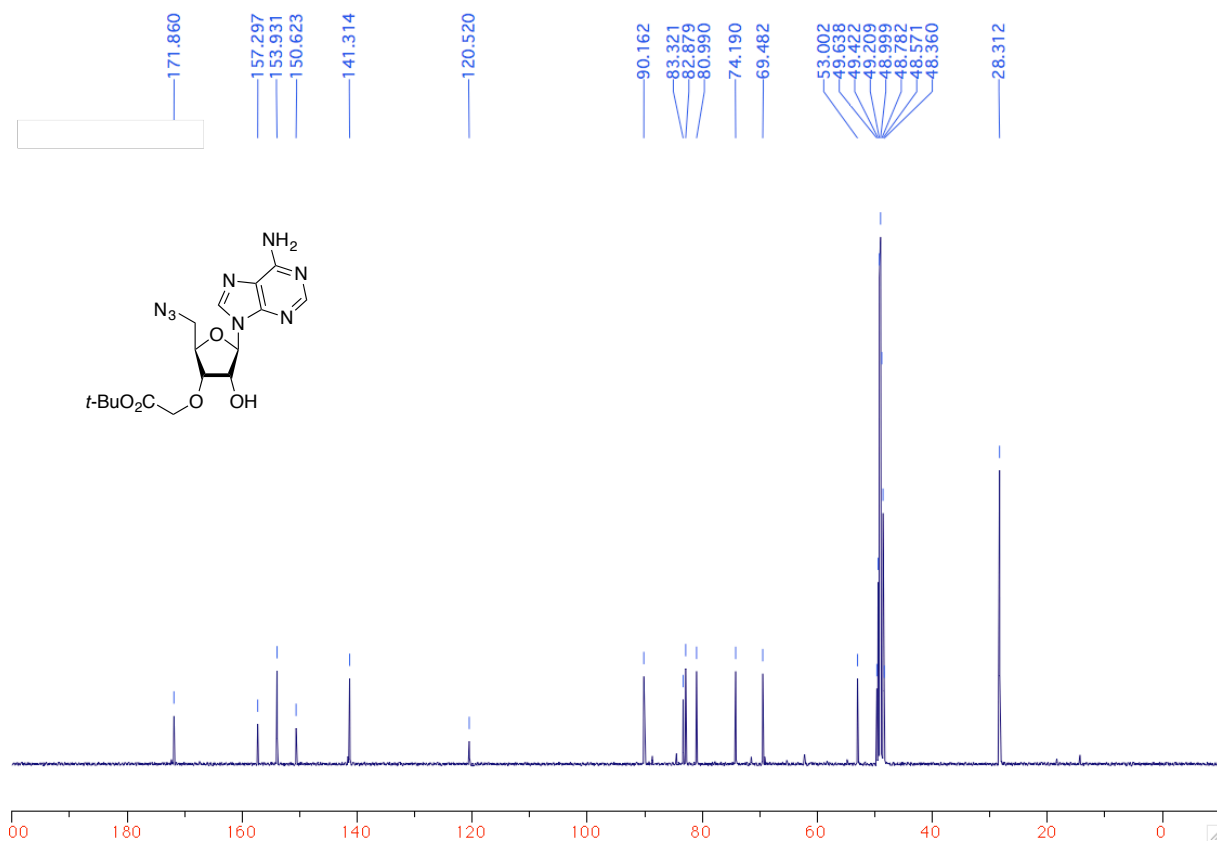

DEPT 135 spectrum of **23** (CD<sub>3</sub>OD, 100 MHz)

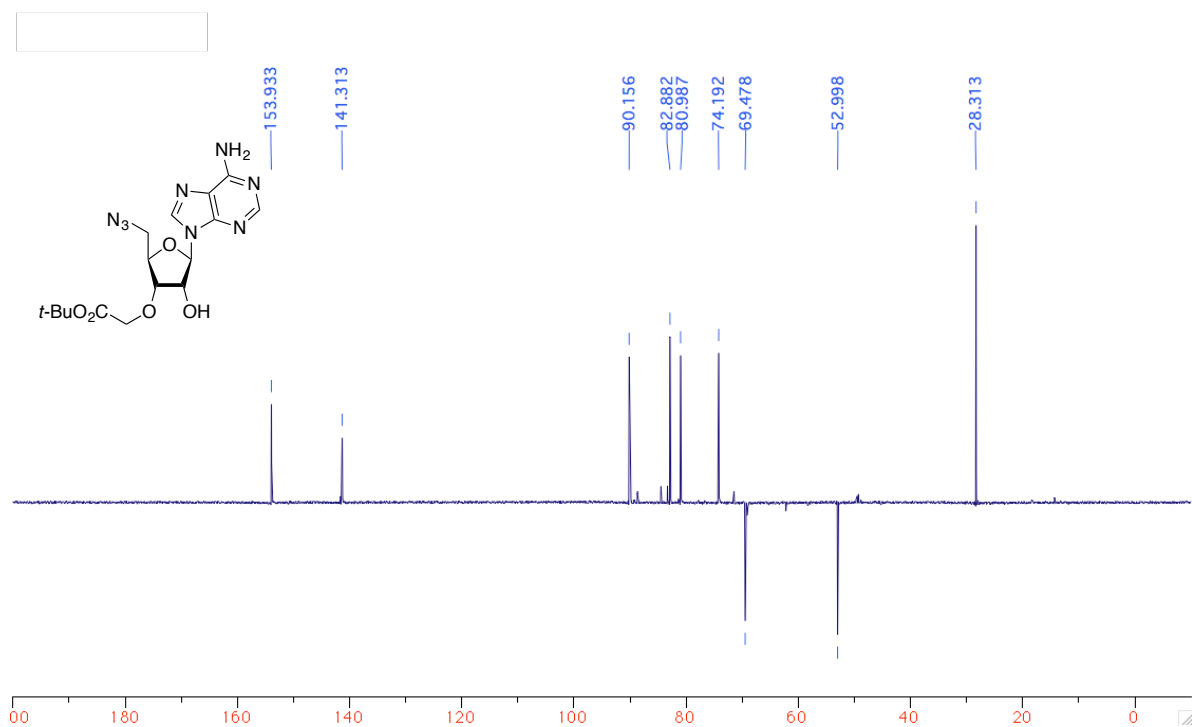

<sup>1</sup>H-NMR spectrum of **24** (CD<sub>3</sub>OD, 400 MHz)

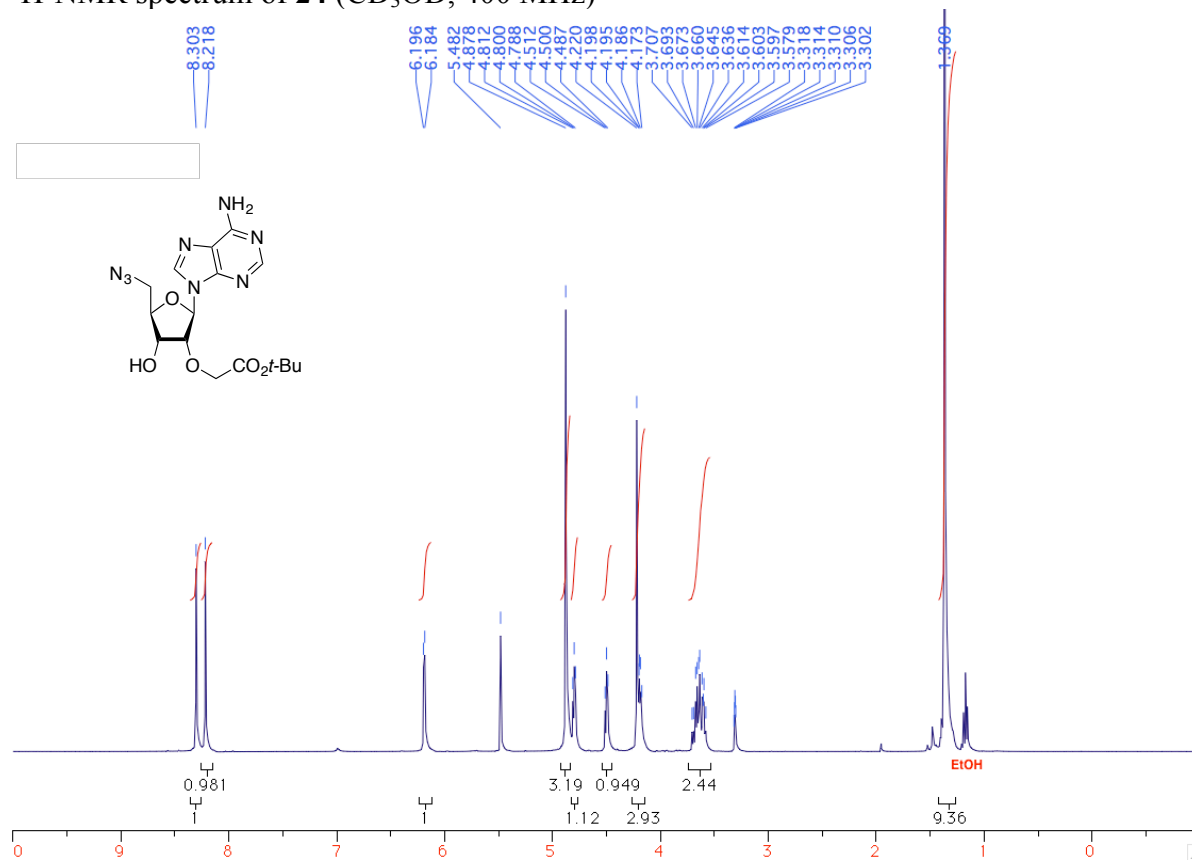

<sup>13</sup>C-NMR spectrum of **24** (CD<sub>3</sub>OD, 100 MHz)

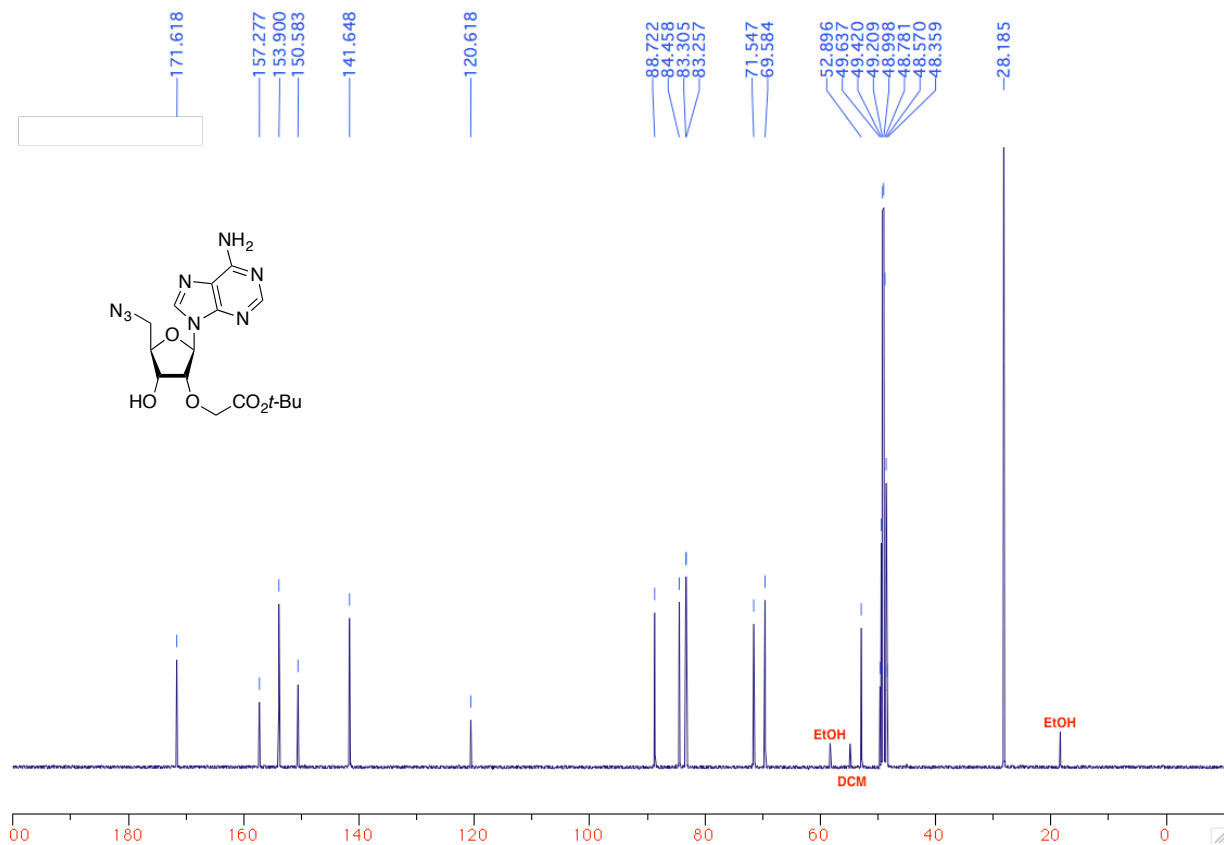

DEPT 135 spectrum of **24** (CD<sub>3</sub>OD, 100 MHz)

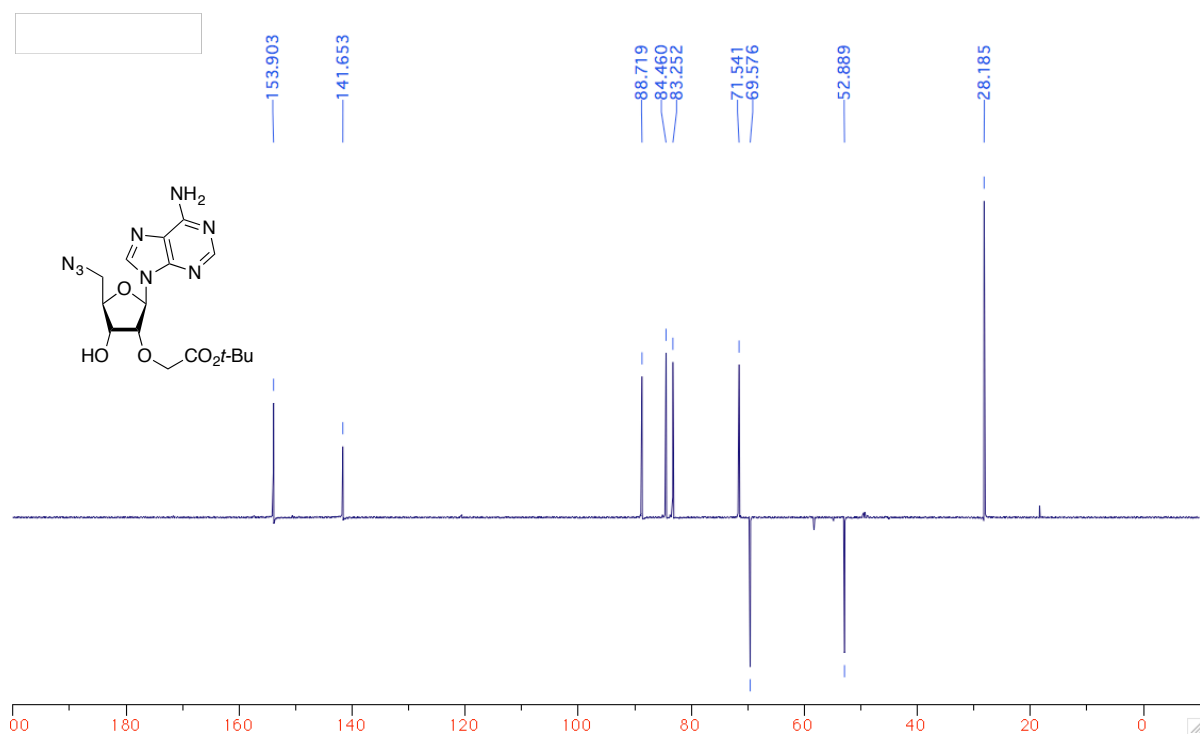

<sup>1</sup>H-NMR spectrum of **25** (CDCl<sub>3</sub>, 400 MHz)

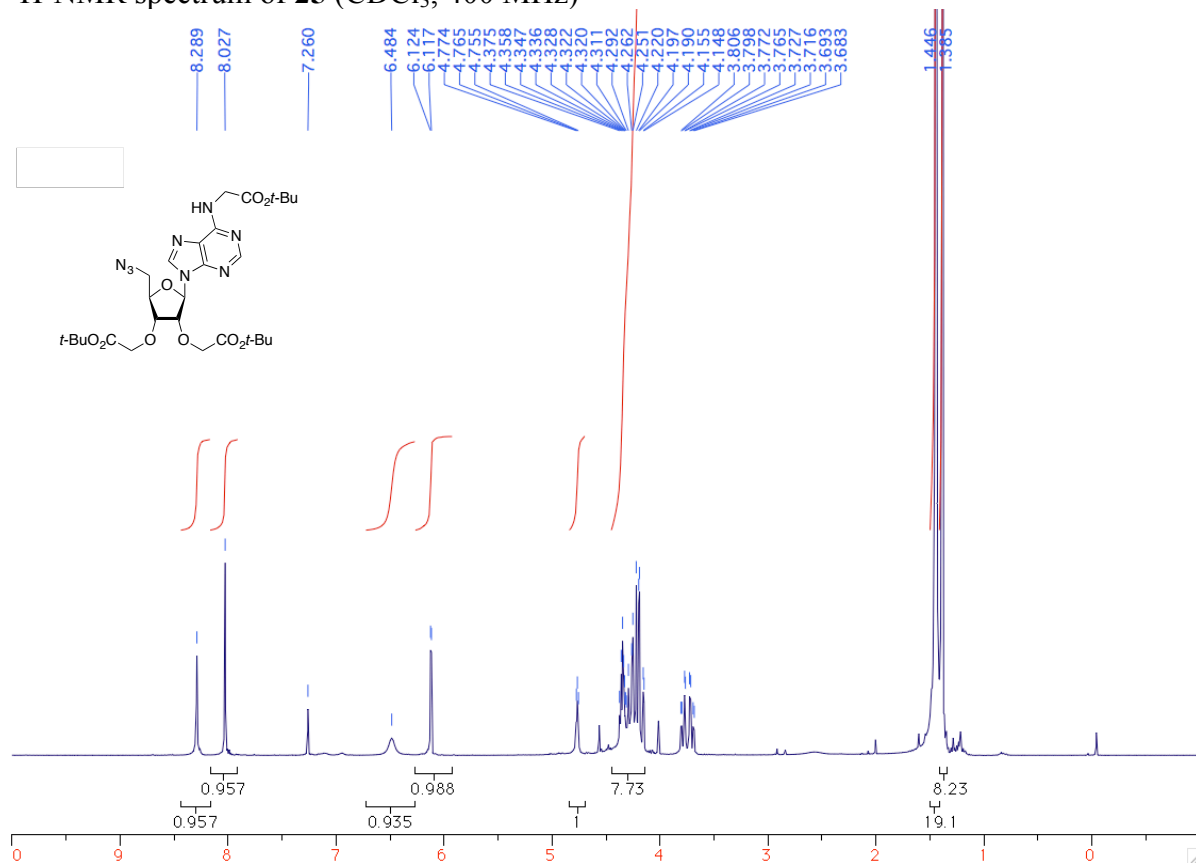

<sup>13</sup>C-NMR spectrum of **25** (CDCl<sub>3</sub>, 100 MHz)

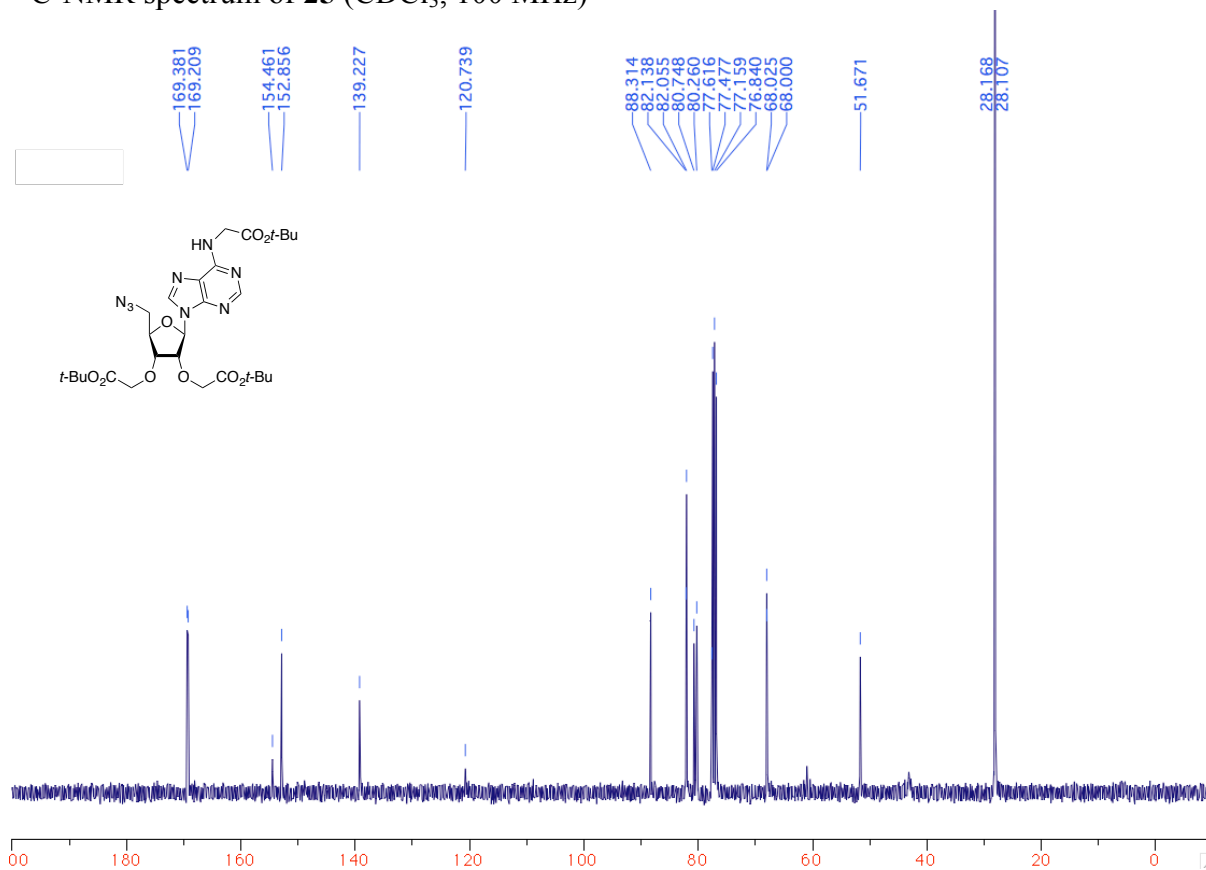

DEPT 135 spectrum of **25** (CDCl<sub>3</sub>, 100 MHz)

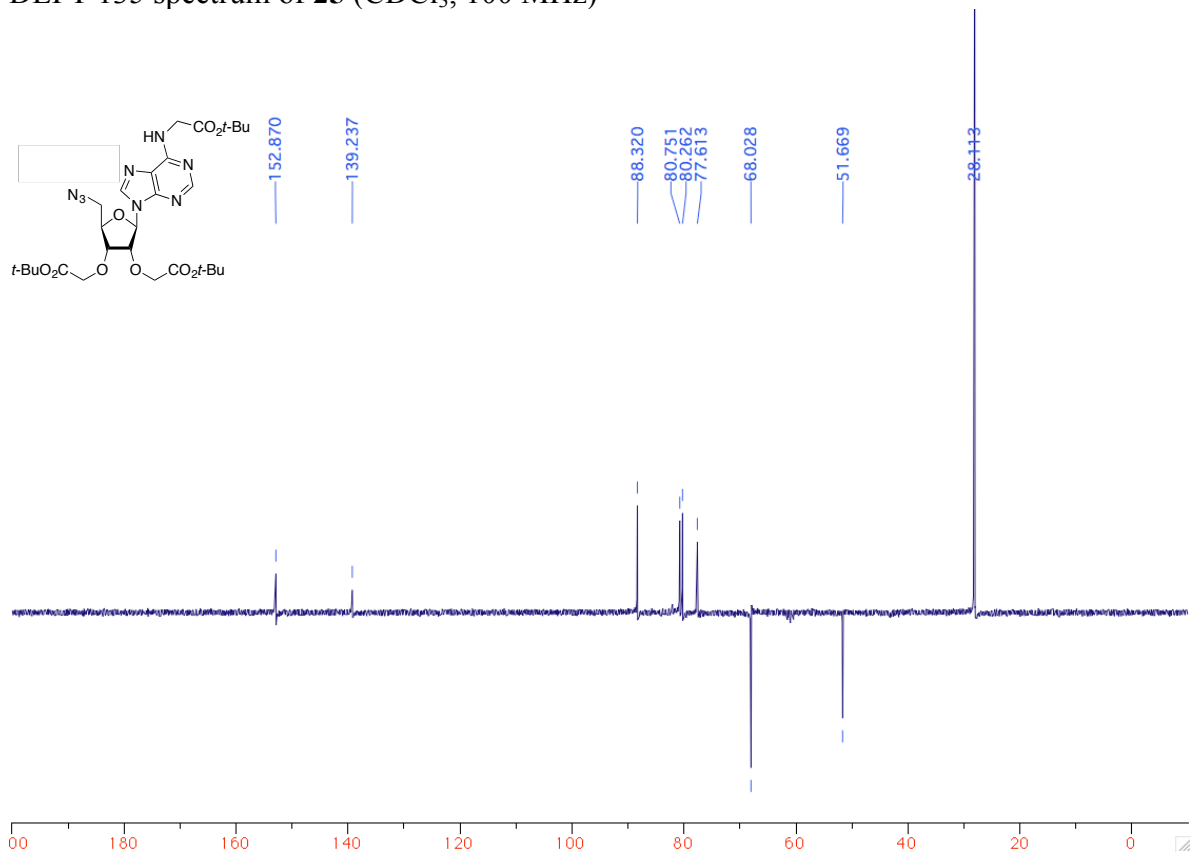

<sup>1</sup>H-NMR spectrum of **26** (CDCl<sub>3</sub>, 400 MHz)

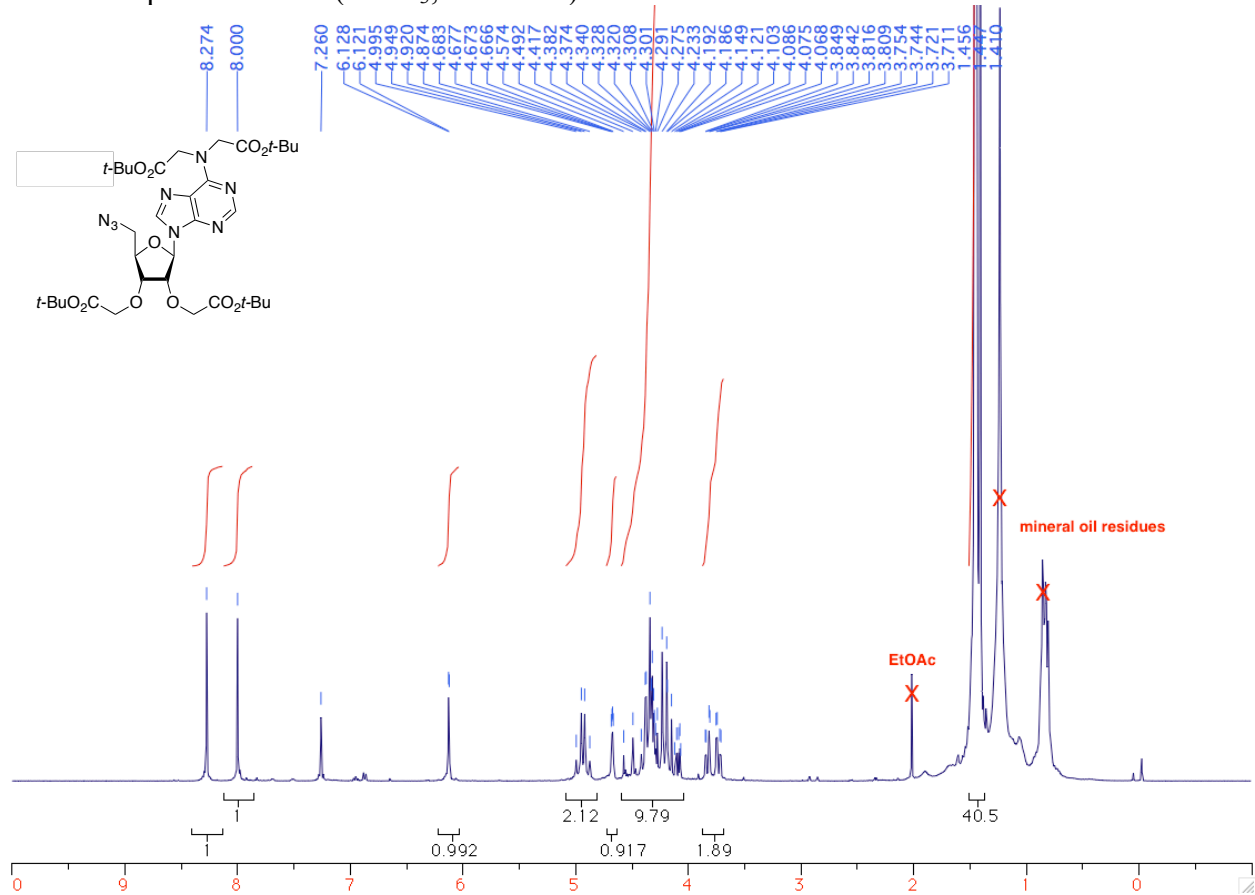

$^{13}\text{C}$ -NMR spectrum of **26** ( $\text{CDCl}_3$ , 100 MHz)

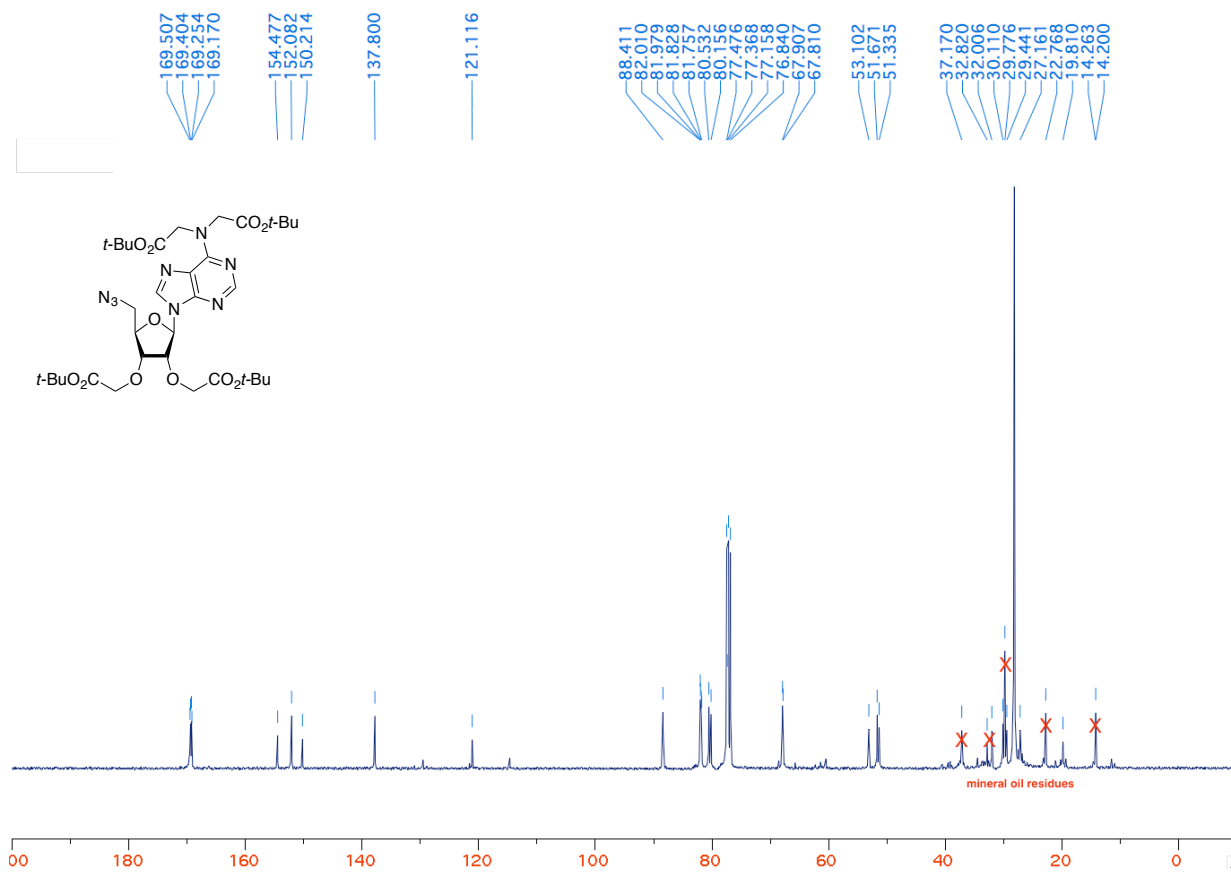

DEPT 135 spectrum of **26** ( $\text{CDCl}_3$ , 100 MHz)

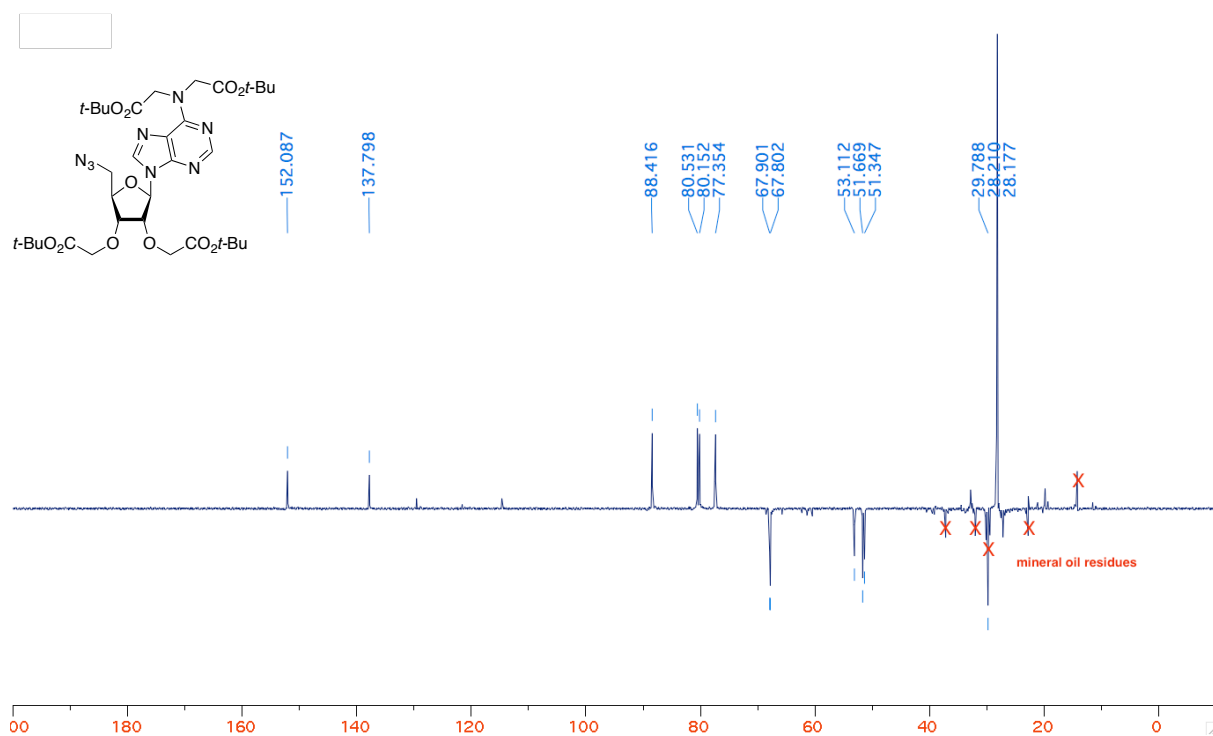



<sup>1</sup>H-NMR spectrum of **27** (CDCl<sub>3</sub>, 400 MHz)

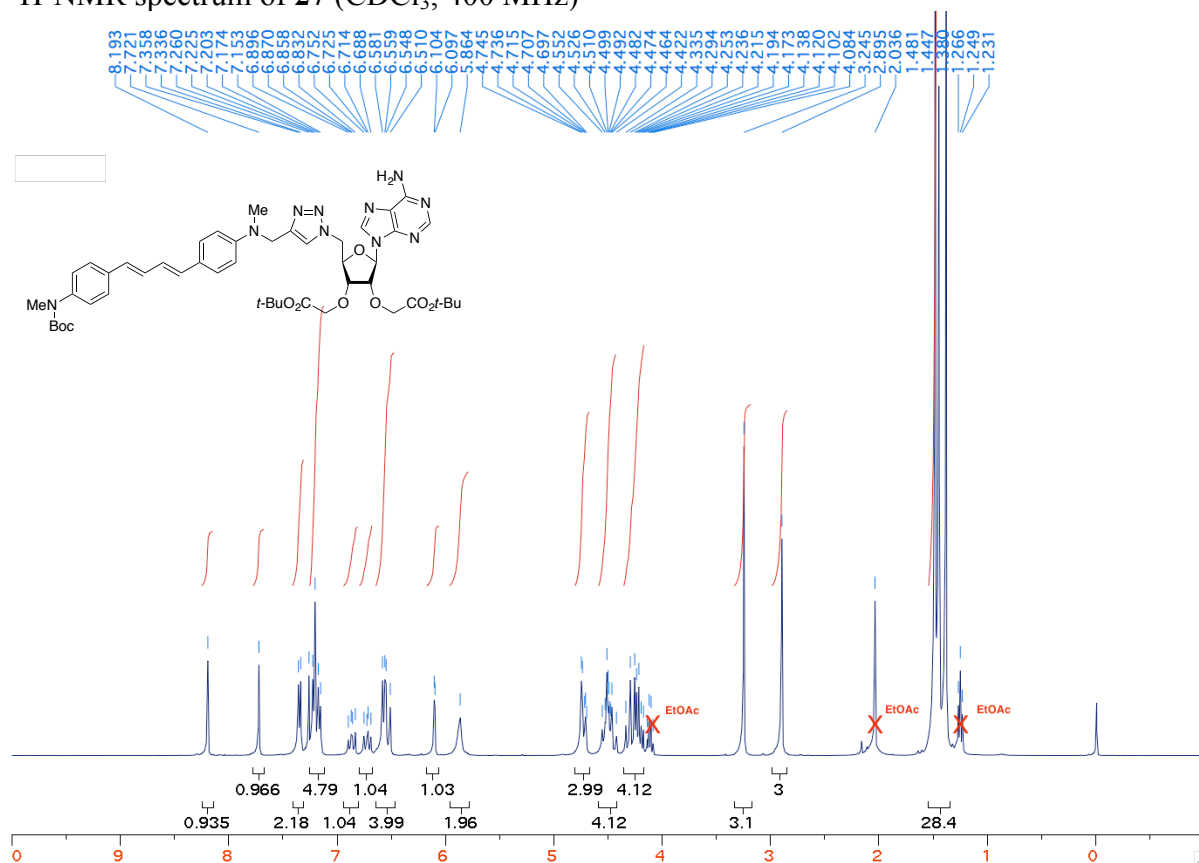

<sup>13</sup>C-NMR spectrum of **27** (CDCl<sub>3</sub>, 100 MHz)

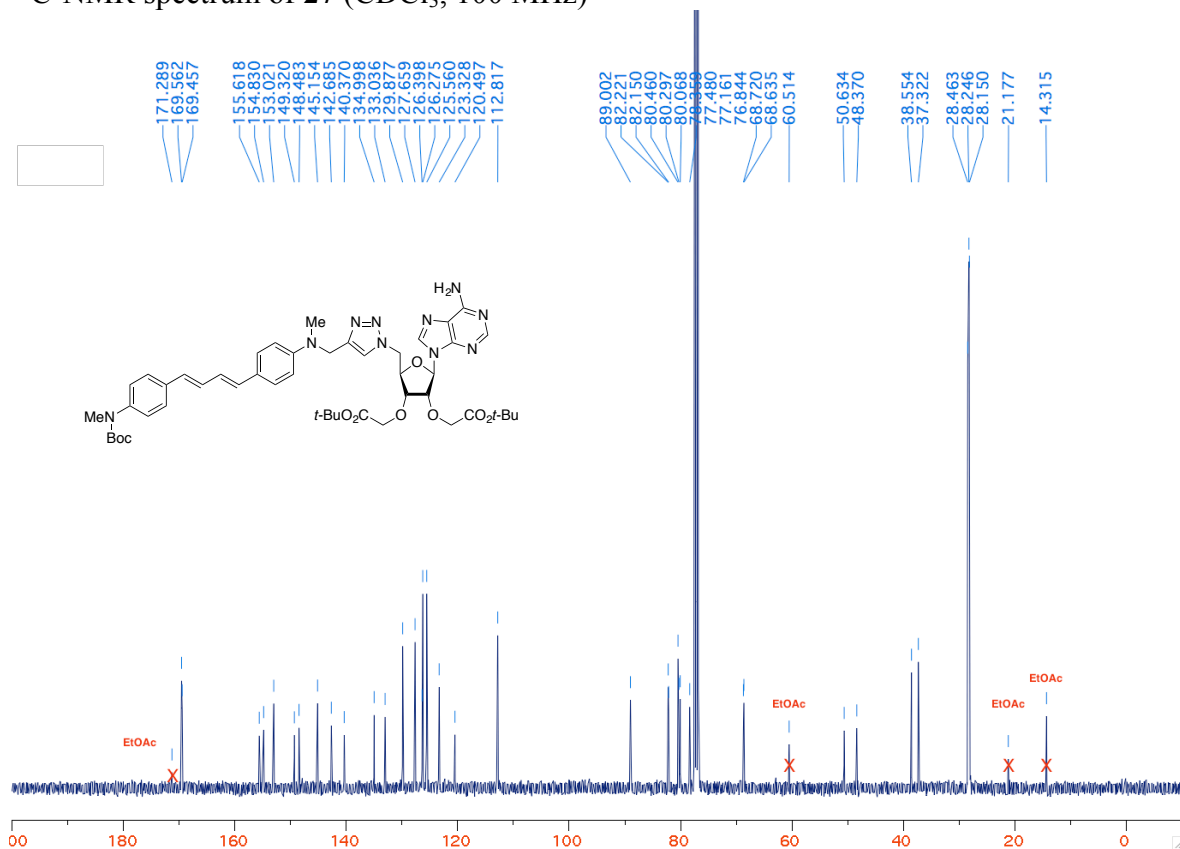

DEPT 135 spectrum of **27** (CDCl<sub>3</sub>, 100 MHz)

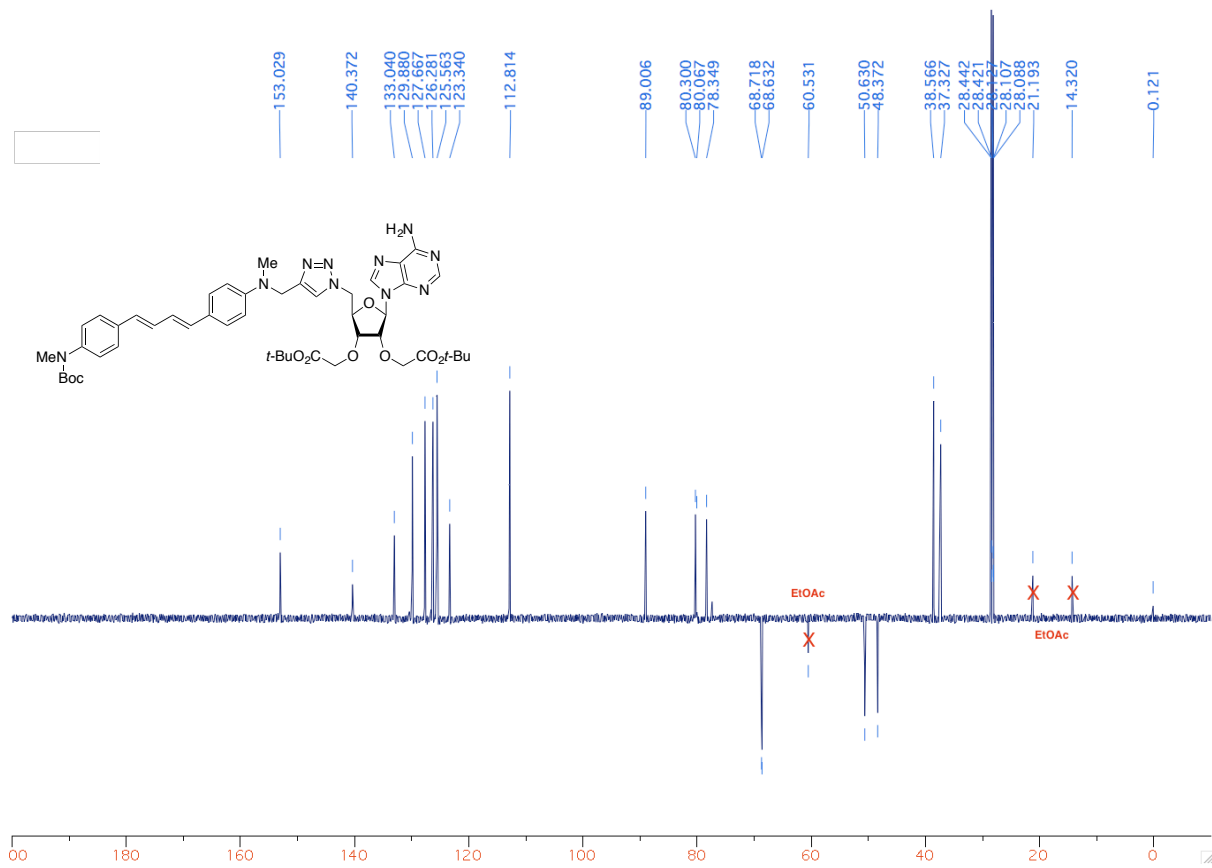

<sup>1</sup>H-NMR spectrum of **28** (CDCl<sub>3</sub>, 400 MHz)

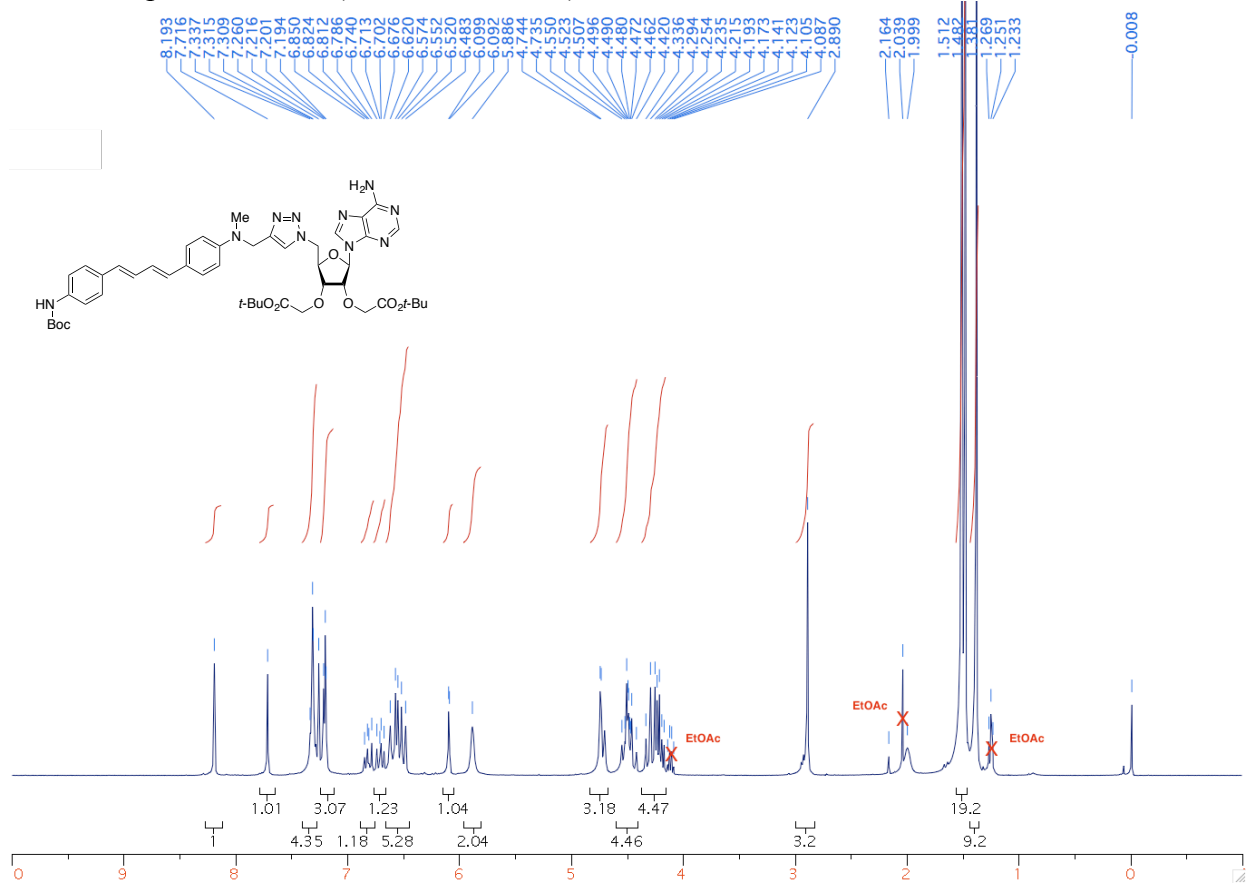

<sup>13</sup>C-NMR spectrum of **28** (CDCl<sub>3</sub>, 100 MHz)

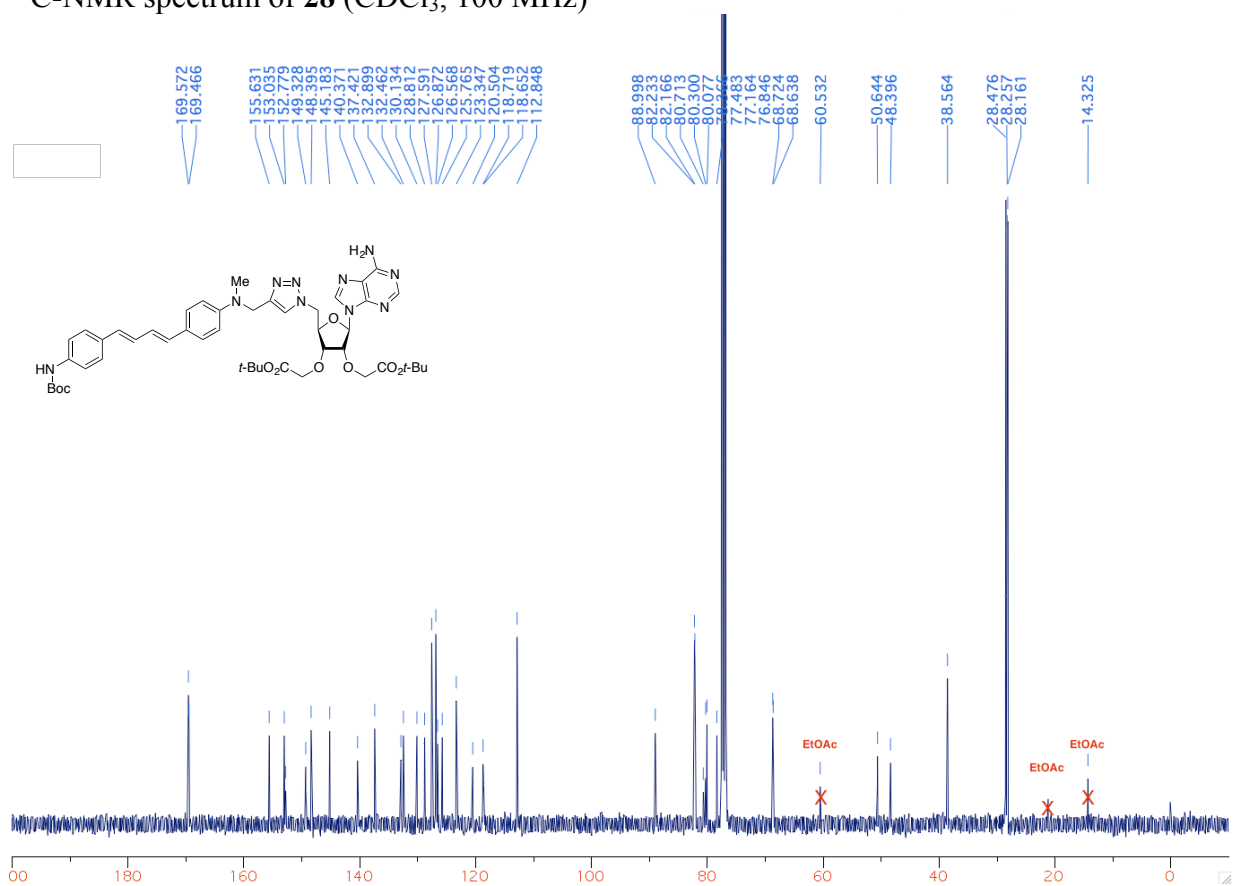

DEPT 135 spectrum of **28** (CDCl<sub>3</sub>, 100 MHz)

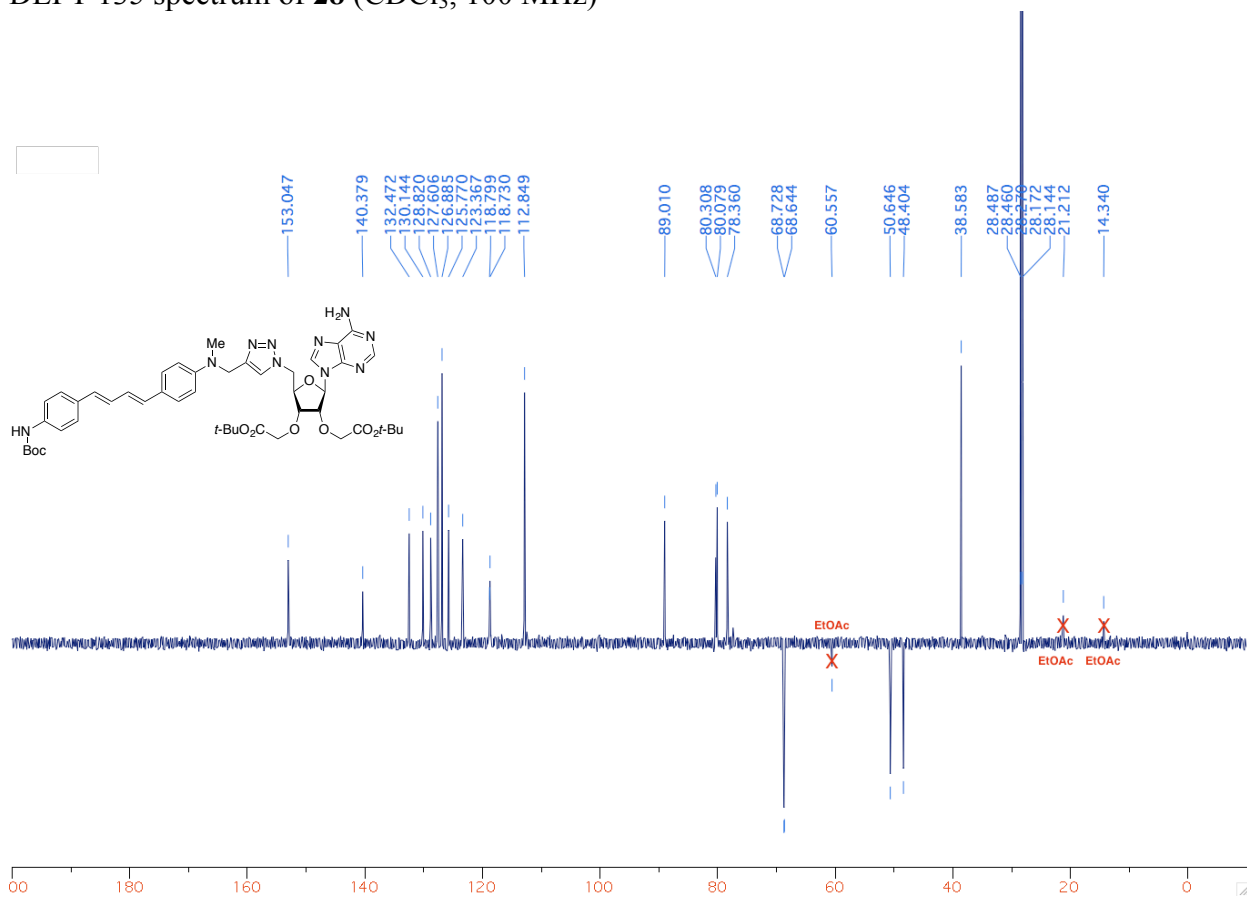

<sup>1</sup>H-NMR spectrum of **29** (CDCl<sub>3</sub>, 400 MHz)

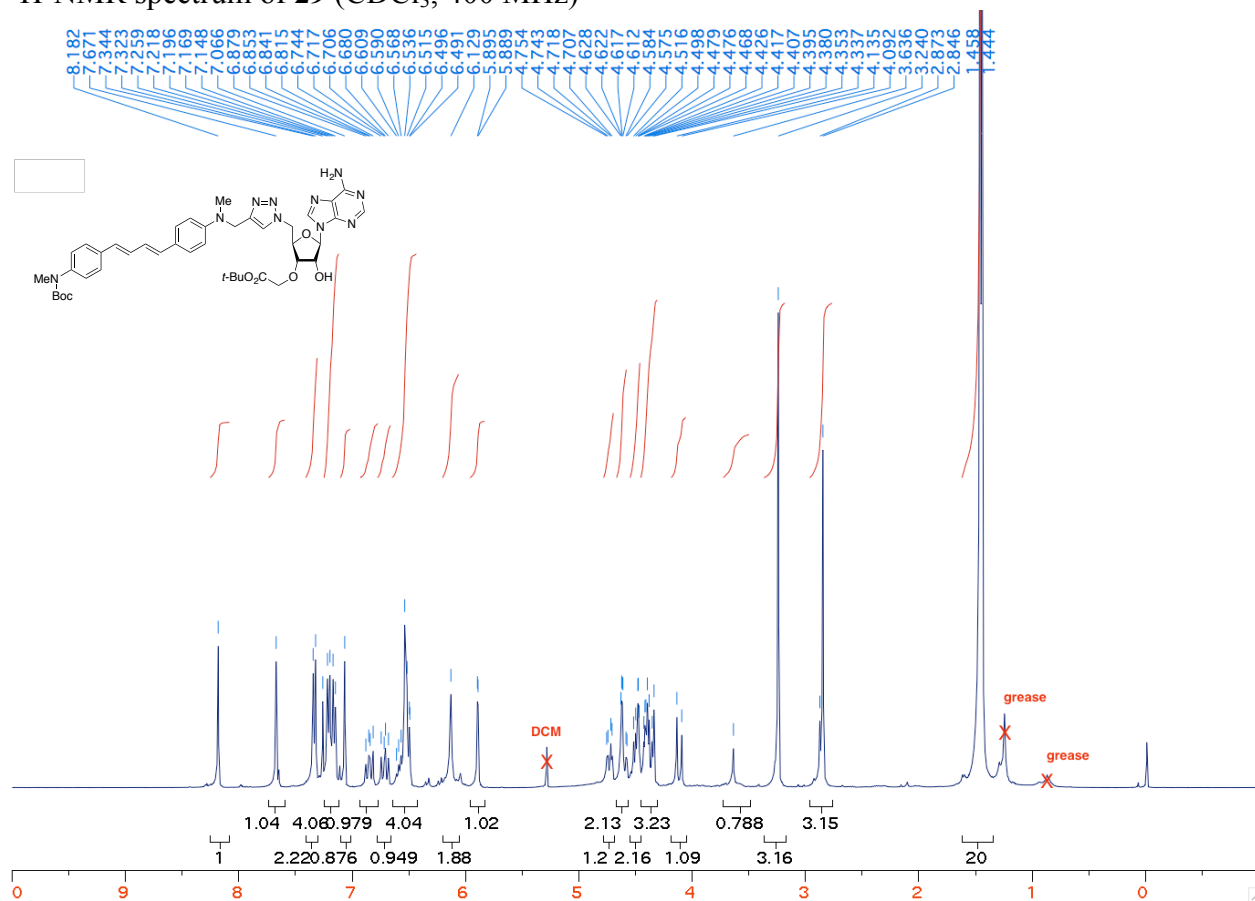

DEPT 135 spectrum of **29** (CDCl<sub>3</sub>, 100 MHz)

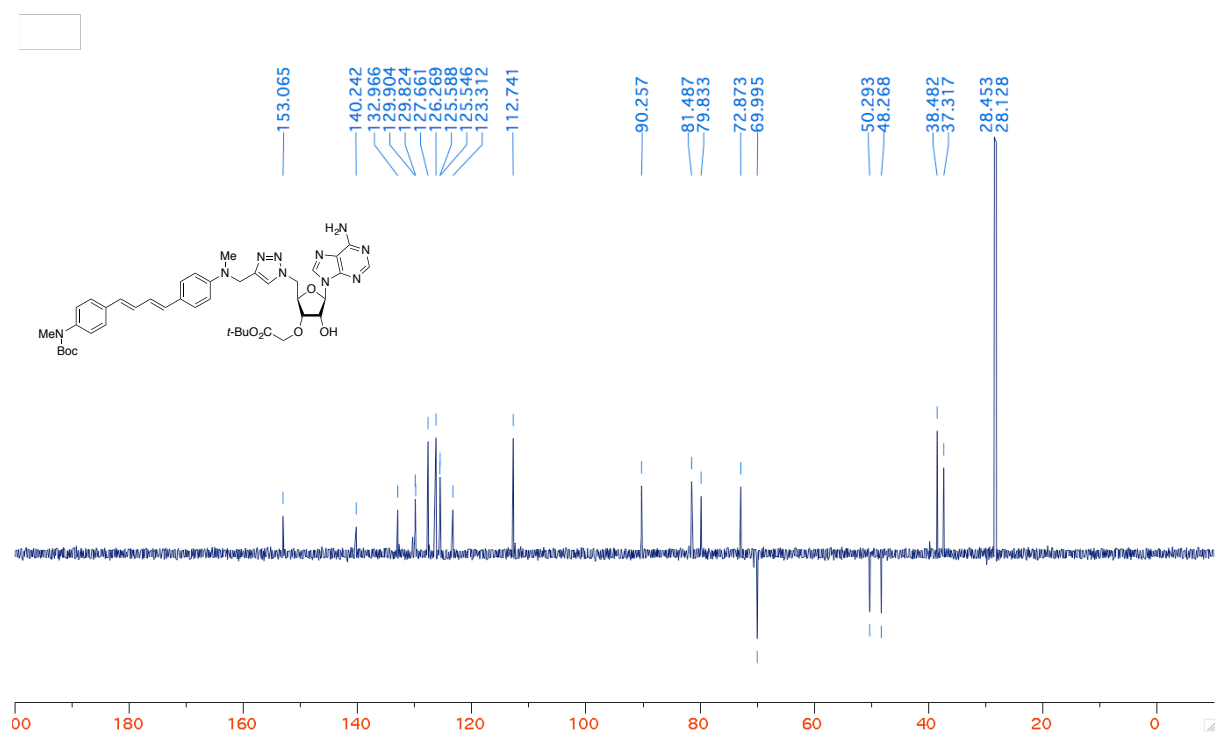

<sup>1</sup>H-NMR spectrum of **30** (CDCl<sub>3</sub>, 400 MHz)

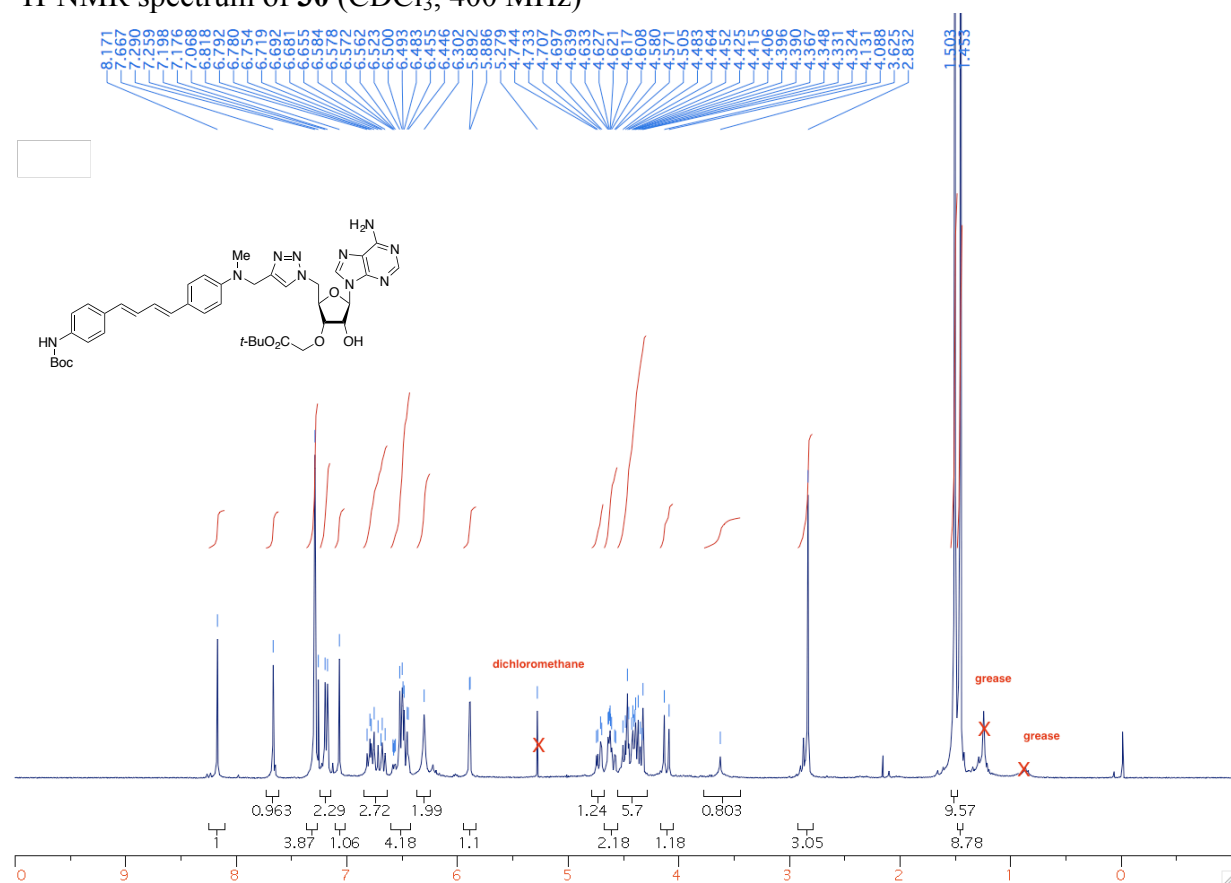

$^{13}\text{C}$ -NMR spectrum of **30** ( $\text{CDCl}_3$ , 100 MHz)

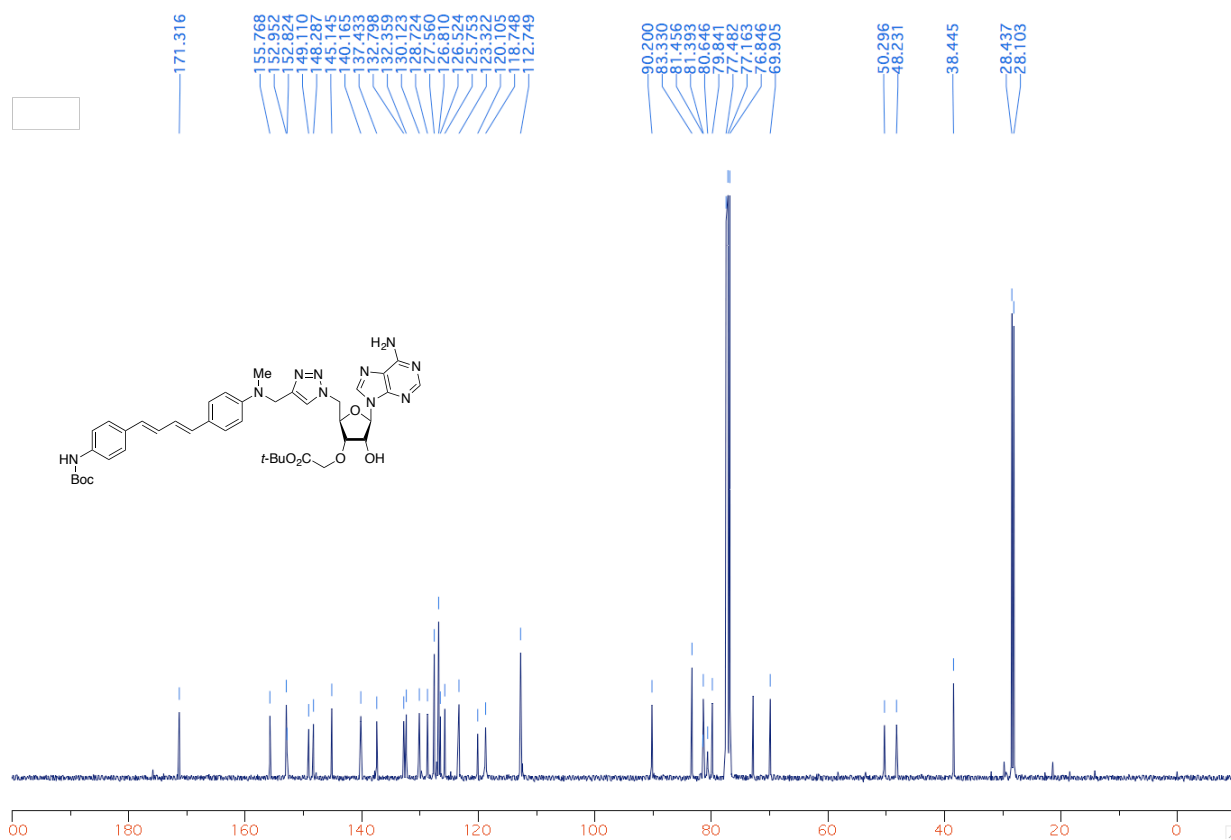

DEPT 135 spectrum of **30** ( $\text{CDCl}_3$ , 100 MHz)

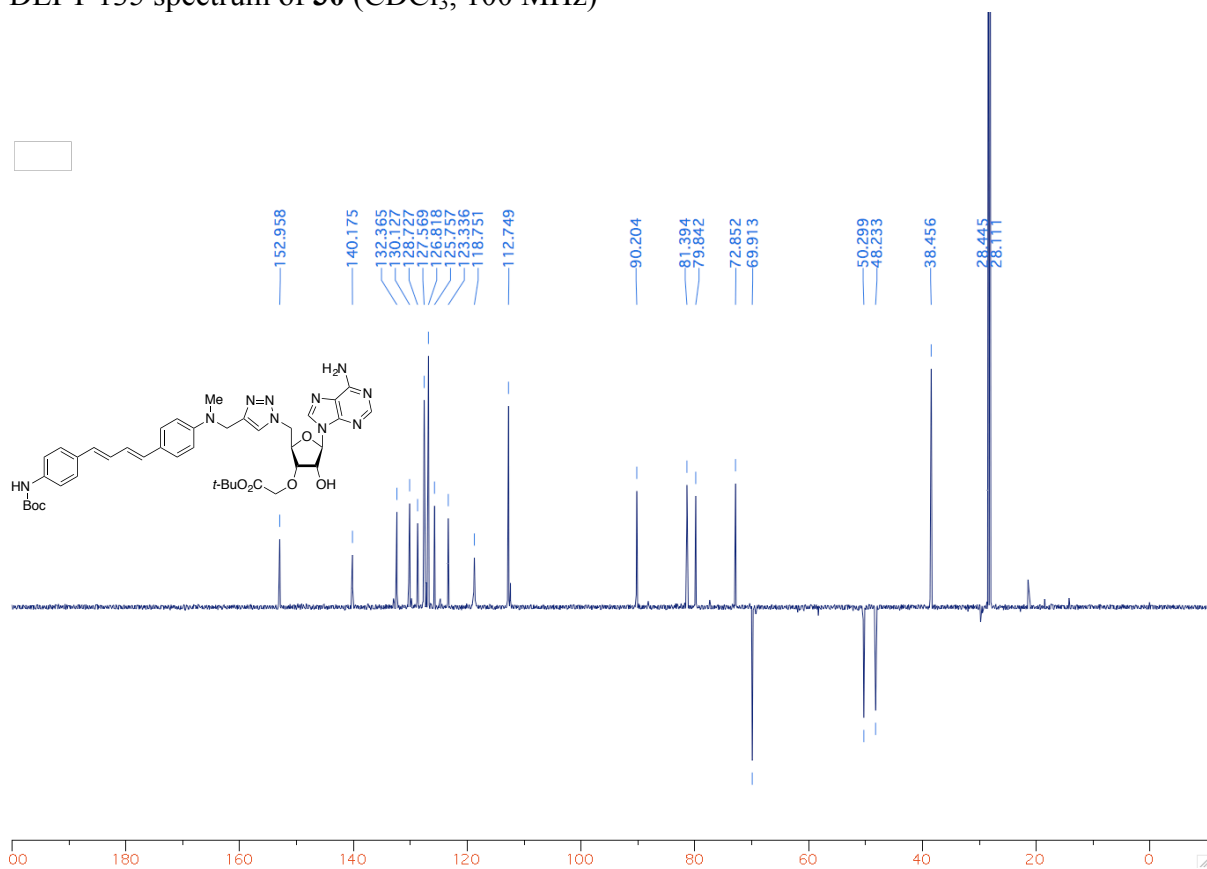

<sup>1</sup>H-NMR spectrum of **31** (CDCl<sub>3</sub>, 400 MHz)

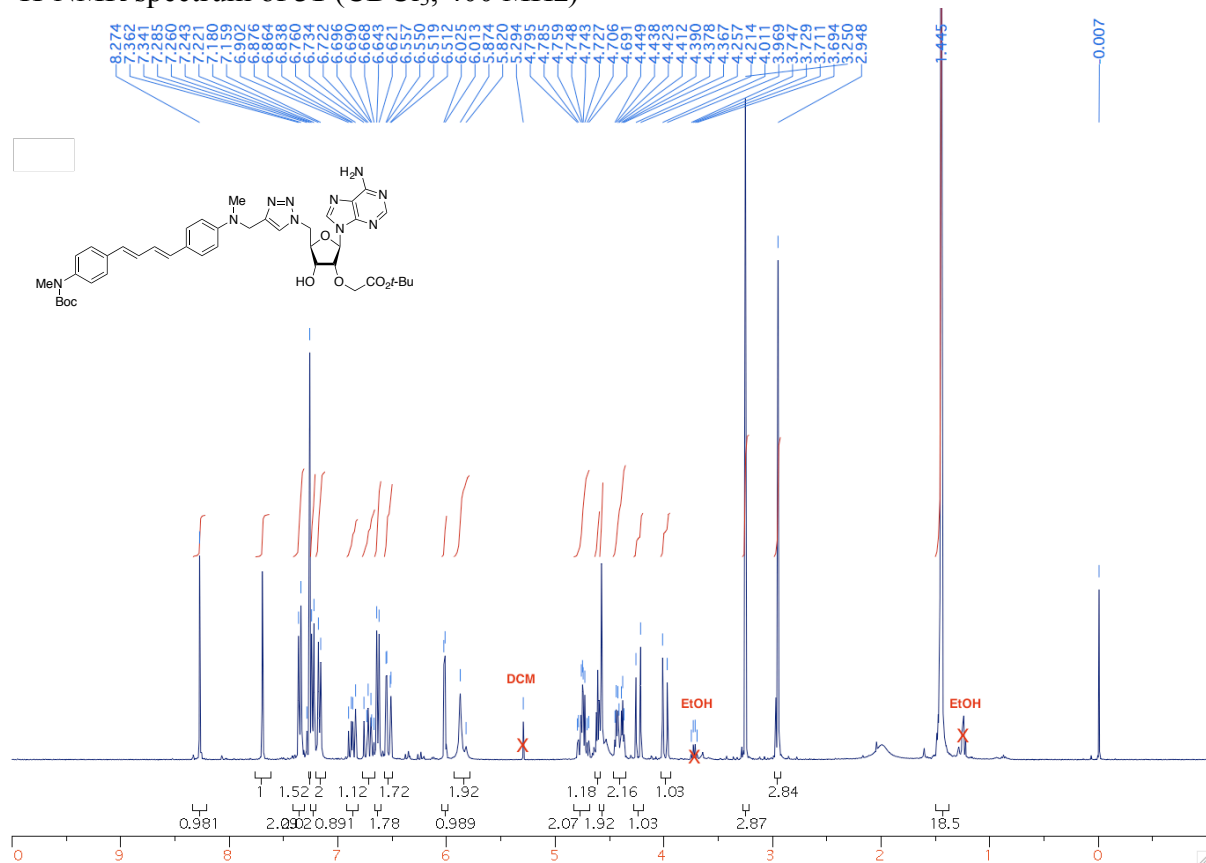

<sup>13</sup>C-NMR spectrum of **31** (CDCl<sub>3</sub>, 100 MHz)

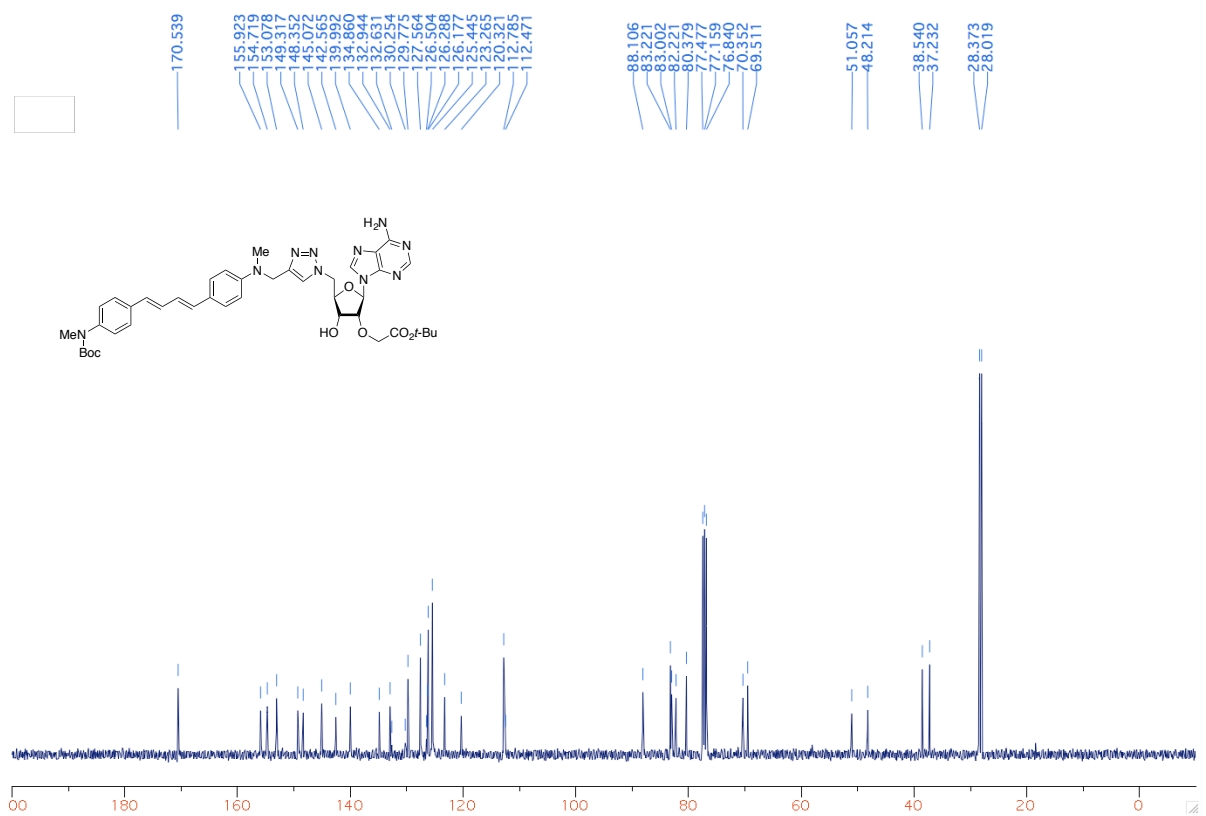

DEPT 135 spectrum of **31** (CDCl<sub>3</sub>, 100 MHz)

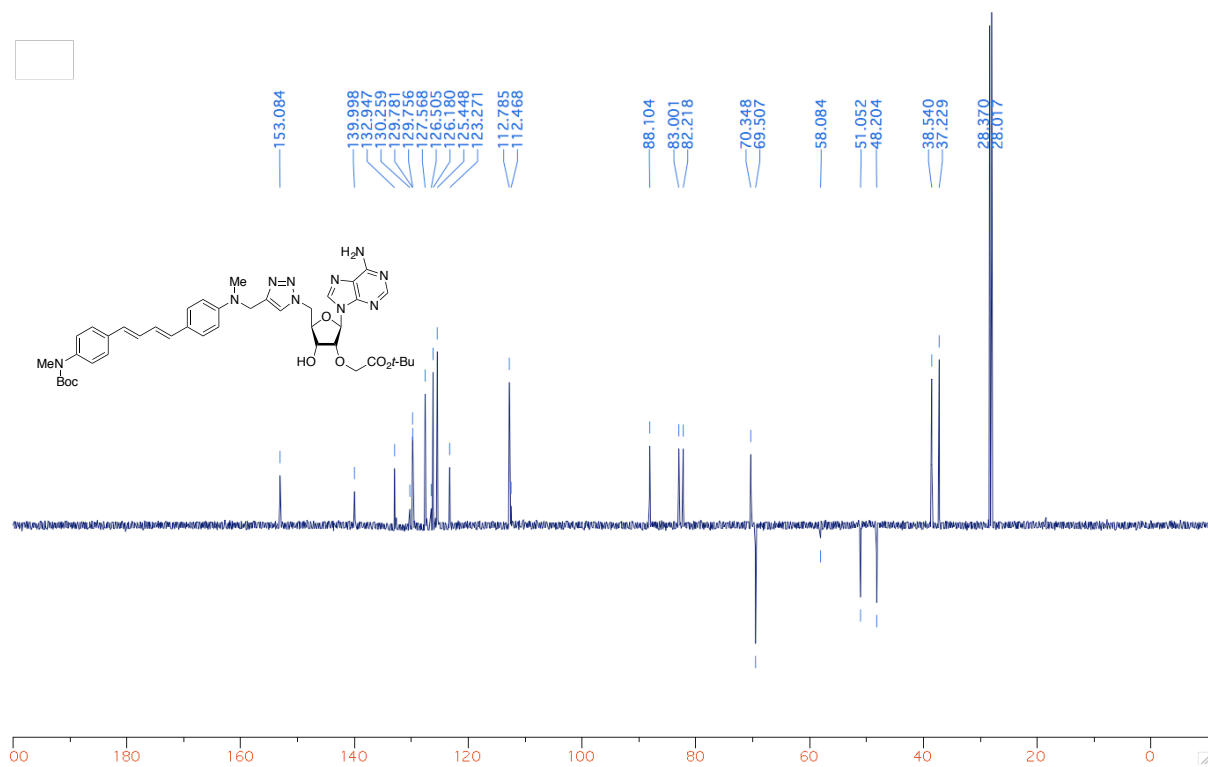

<sup>1</sup>H-NMR spectrum of **32** (CDCl<sub>3</sub>, 400 MHz)

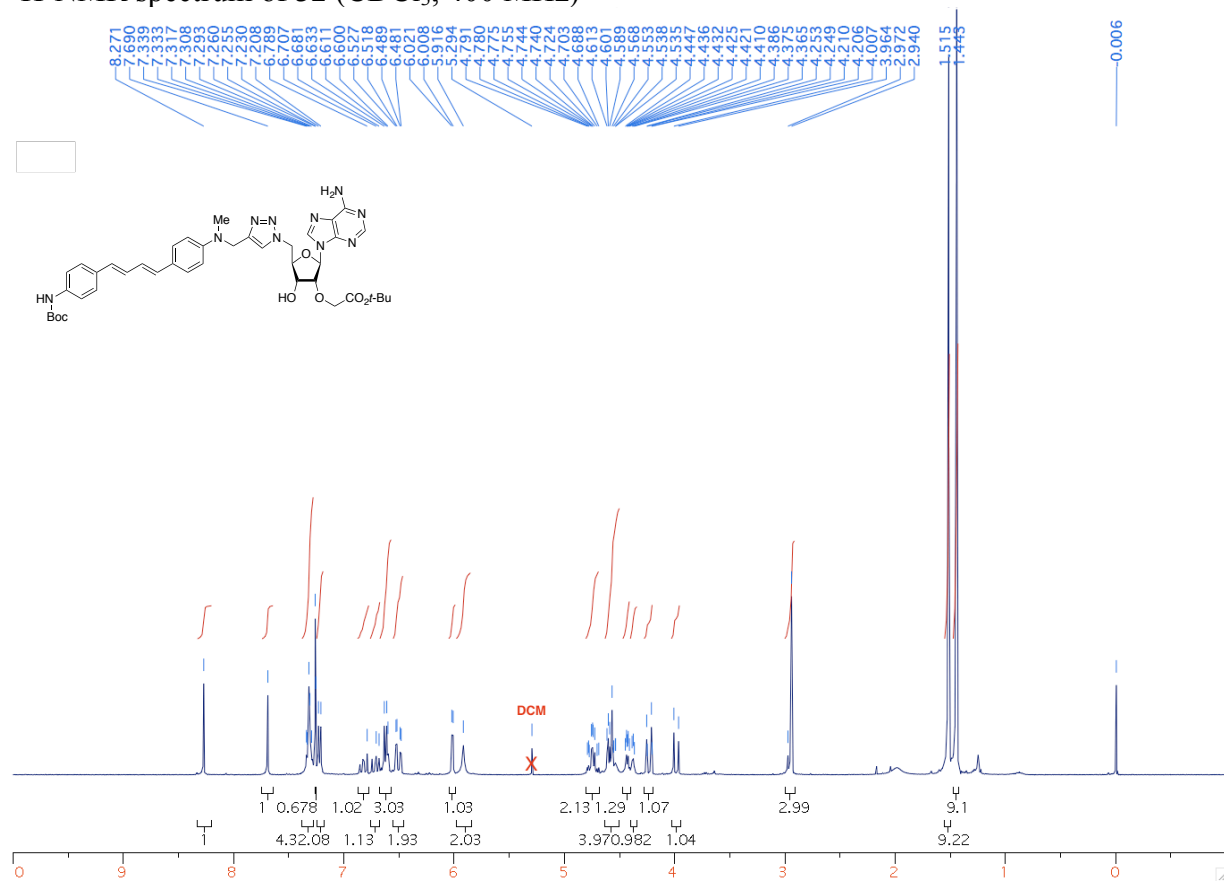



$^{13}\text{C}$ -NMR spectrum of **32** ( $\text{CDCl}_3$ , 100 MHz)

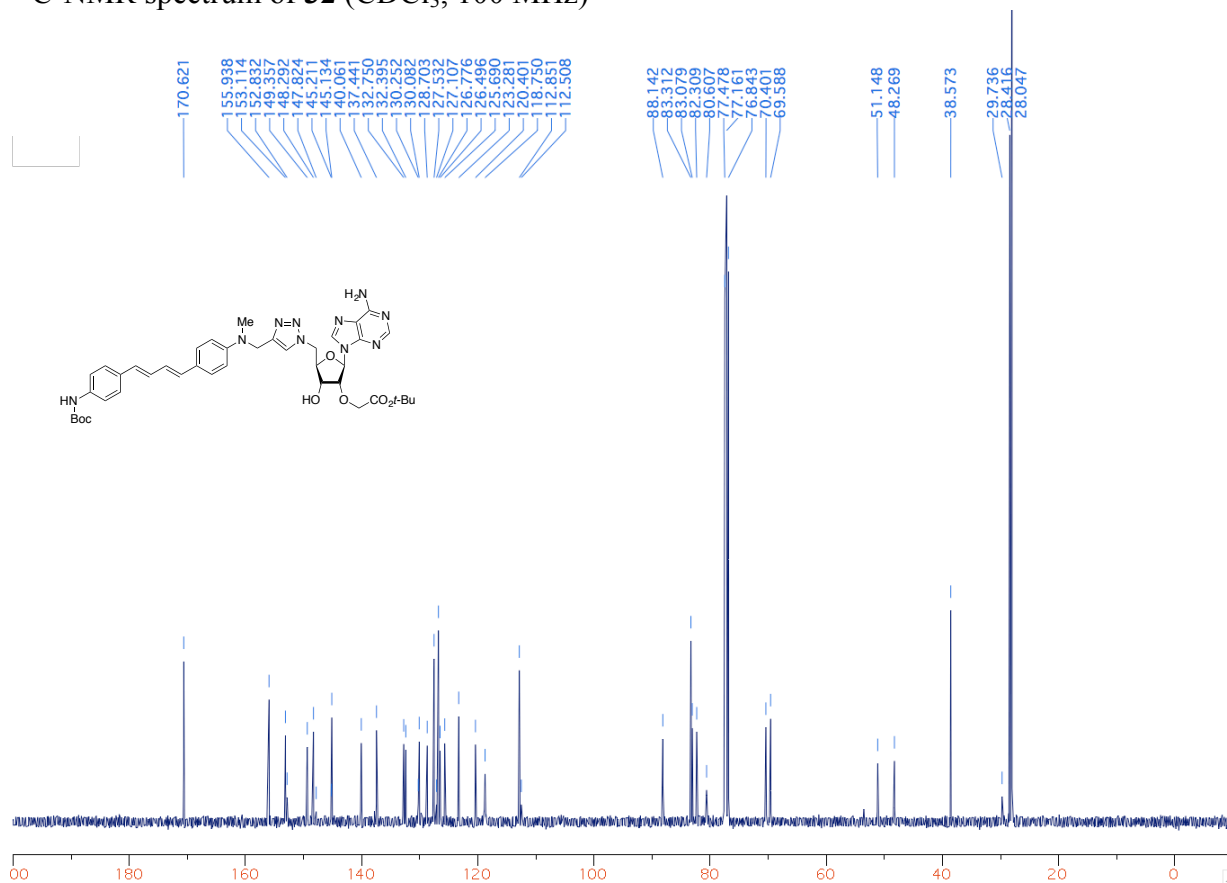

DEPT 135 spectrum of **32** ( $\text{CDCl}_3$ , 400 MHz)

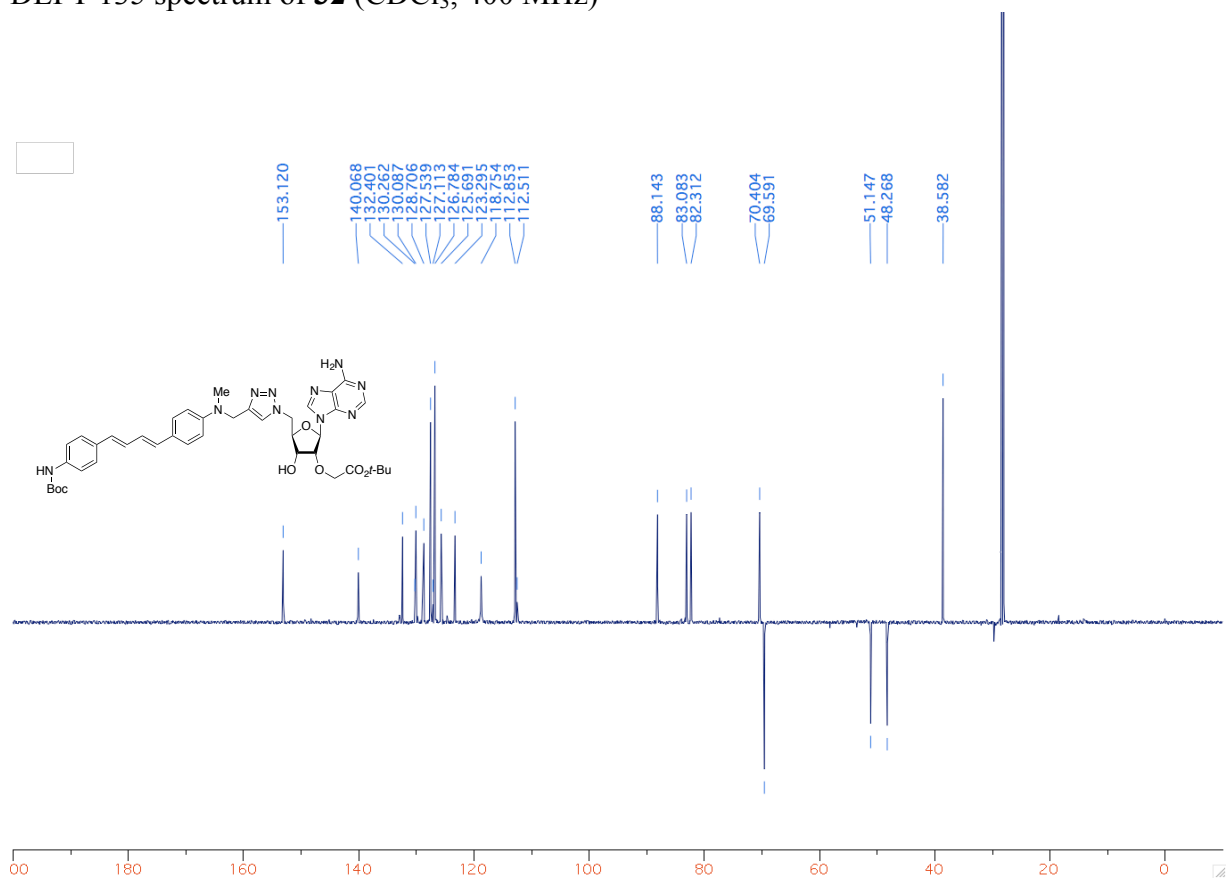

<sup>1</sup>H-NMR spectrum of **33** (DMSO-d<sub>6</sub>, 400 MHz)

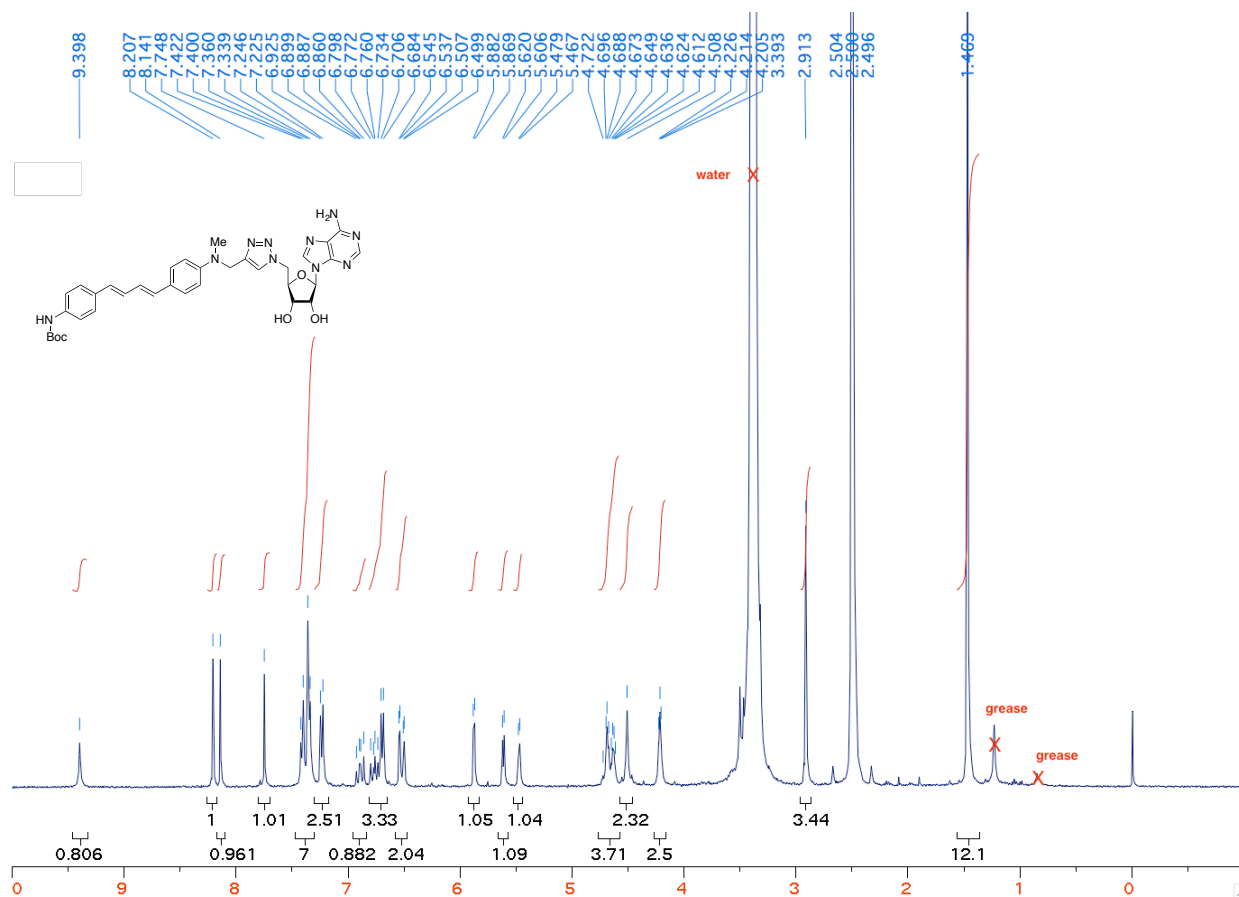

<sup>13</sup>C-NMR spectrum of **33** (DMSO-d<sub>6</sub>, 100 MHz)

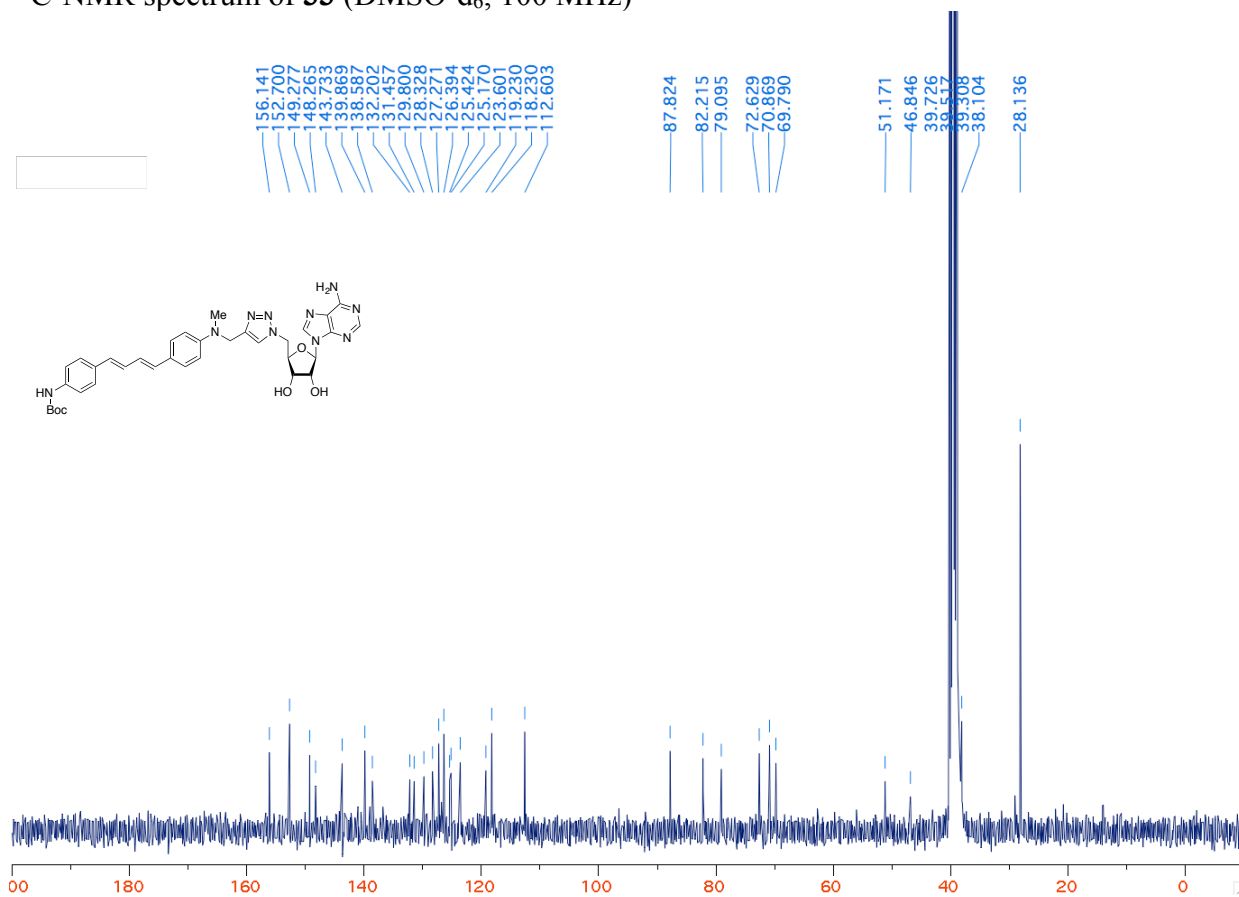

DEPT 135 spectrum of **33** (DMSO-d<sub>6</sub>, 100 MHz)

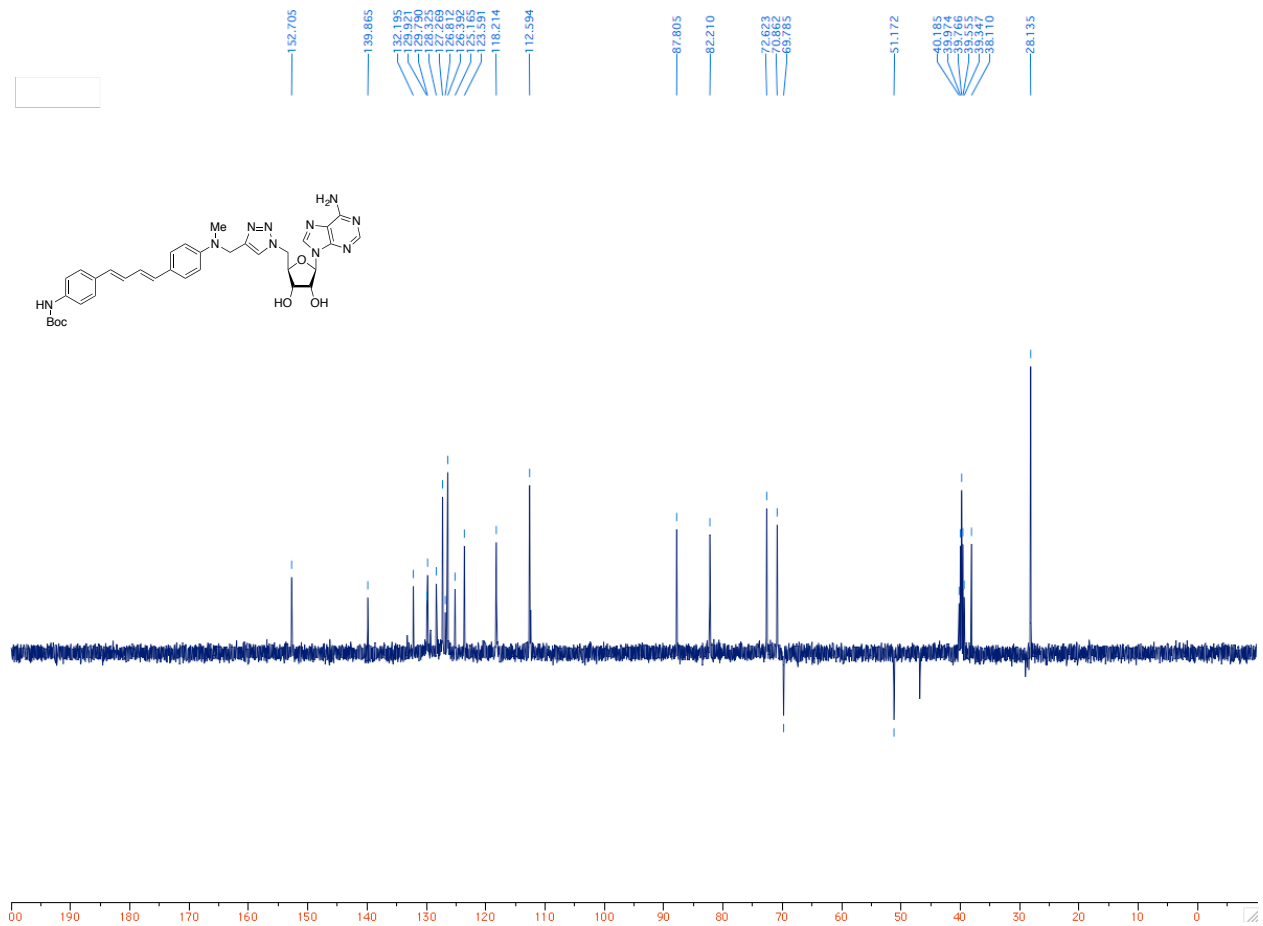

<sup>1</sup>H-NMR spectrum of **1** (CD<sub>3</sub>OD, 400 MHz)

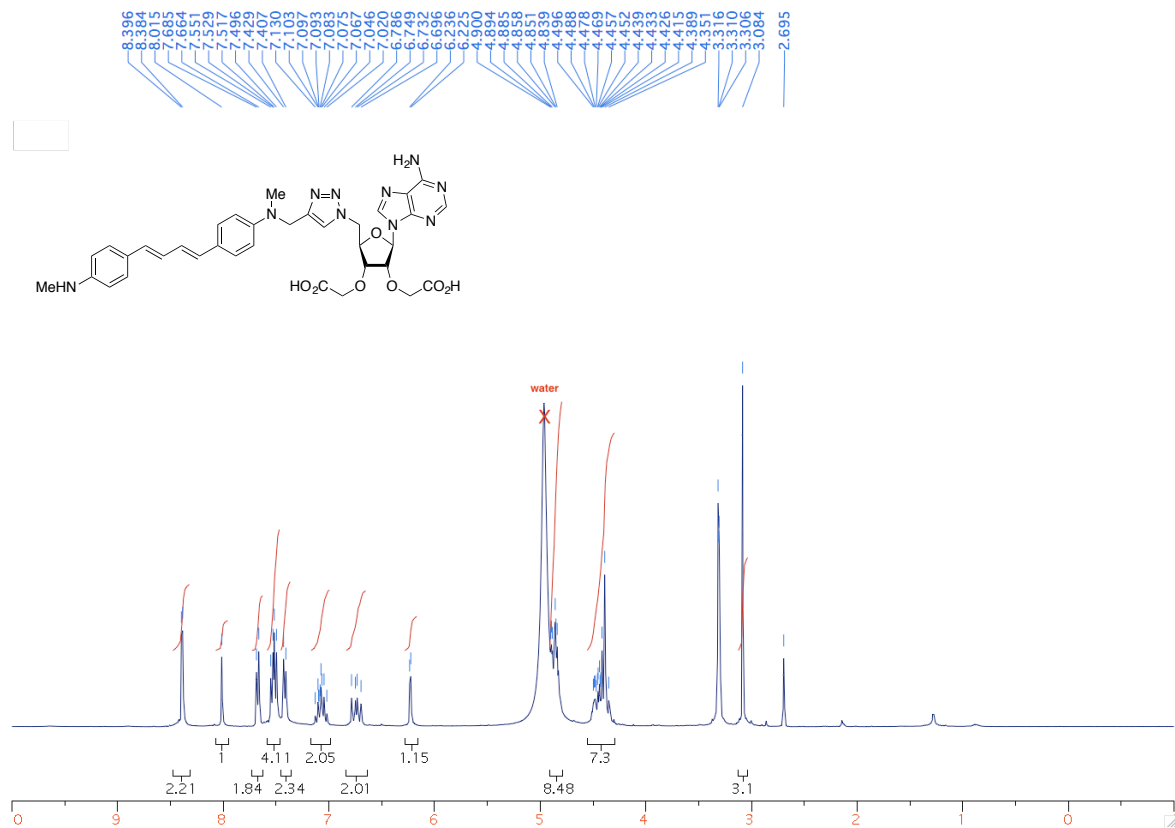

$^{13}\text{C}$ -NMR spectrum of **1** ( $\text{CD}_3\text{OD}$ , 100 MHz)

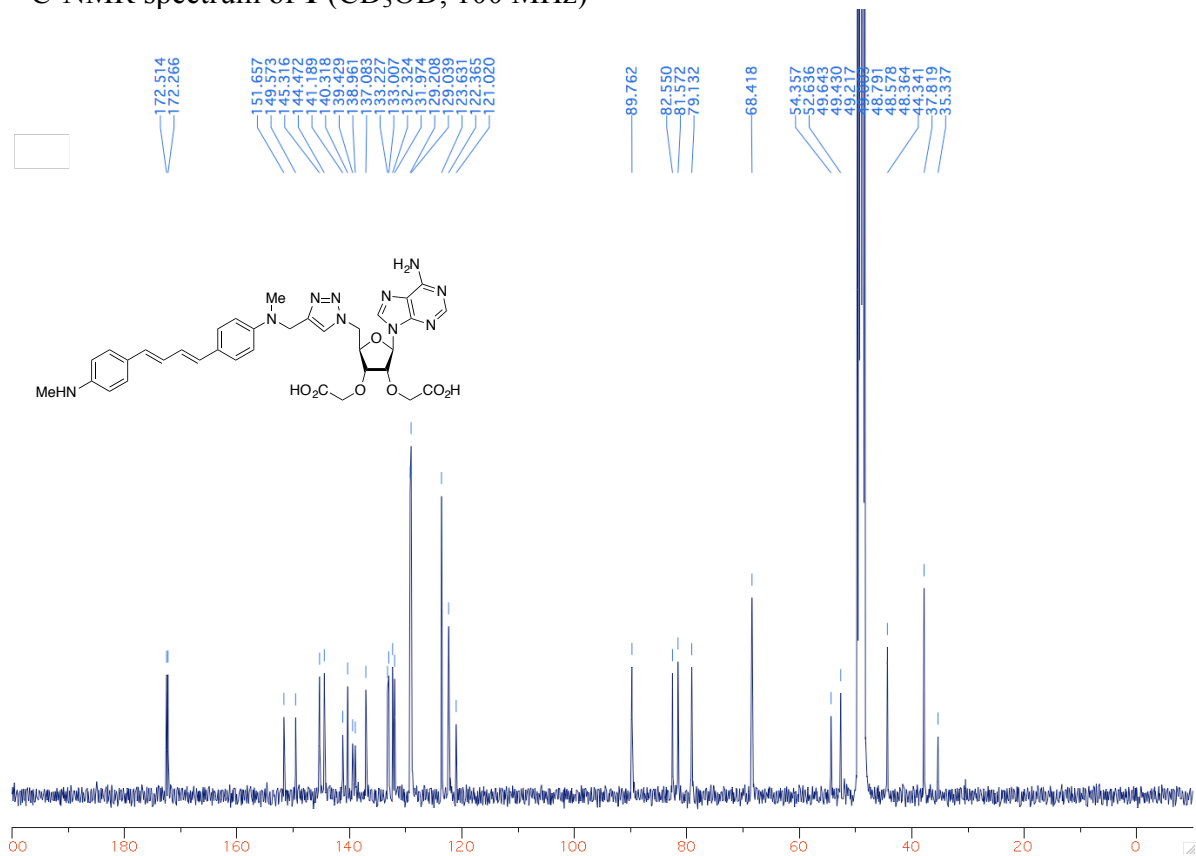

DEPT 135 spectrum of **1** ( $\text{CD}_3\text{OD}$ , 400 MHz)

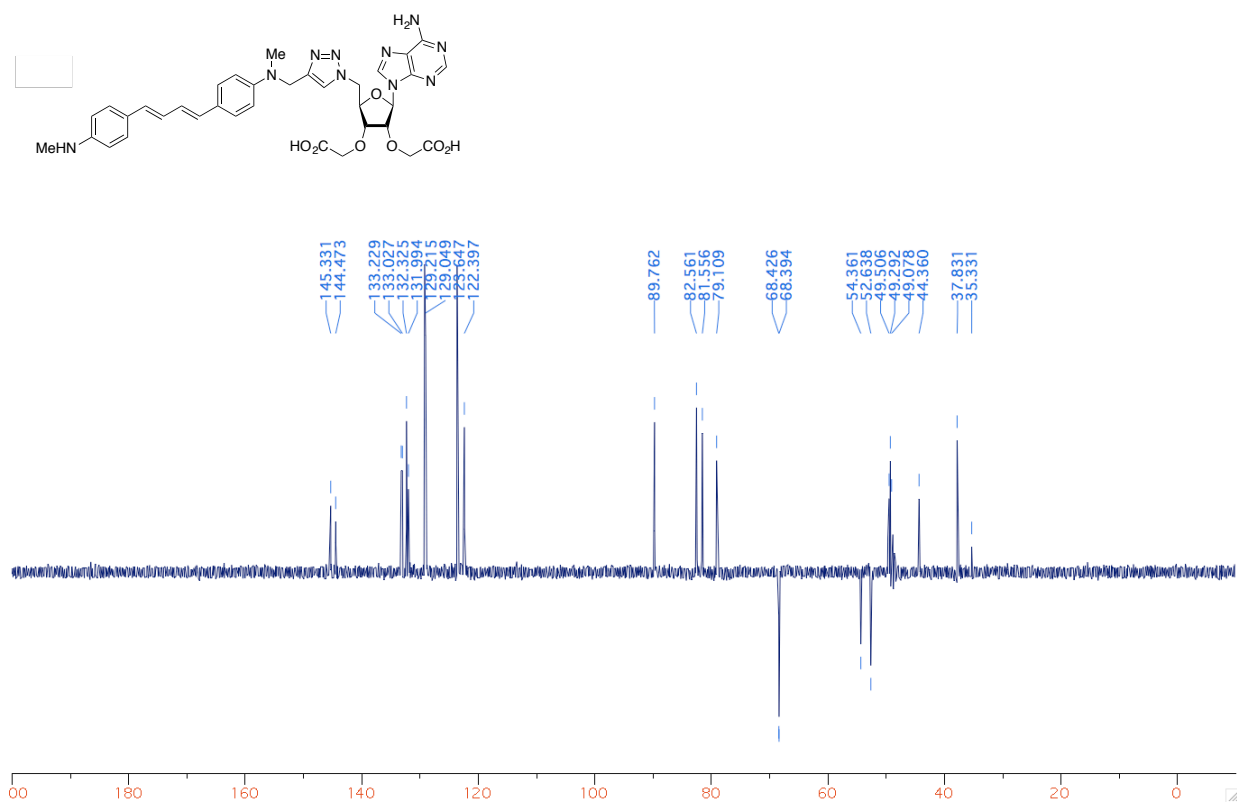

<sup>1</sup>H-NMR spectrum of **2** (CD<sub>3</sub>OD, 400 MHz)

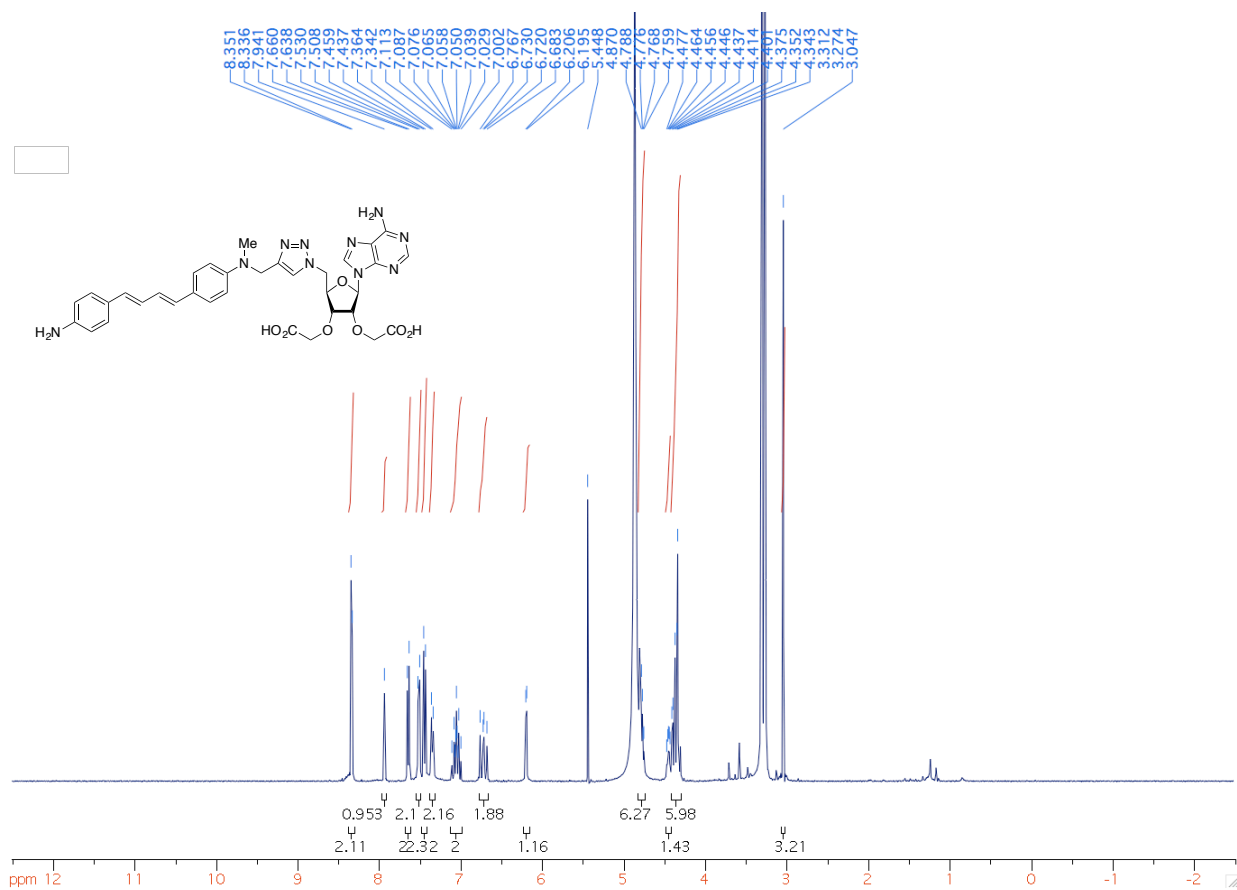

<sup>13</sup>C-NMR spectrum of **2** (CD<sub>3</sub>OD, 100 MHz)

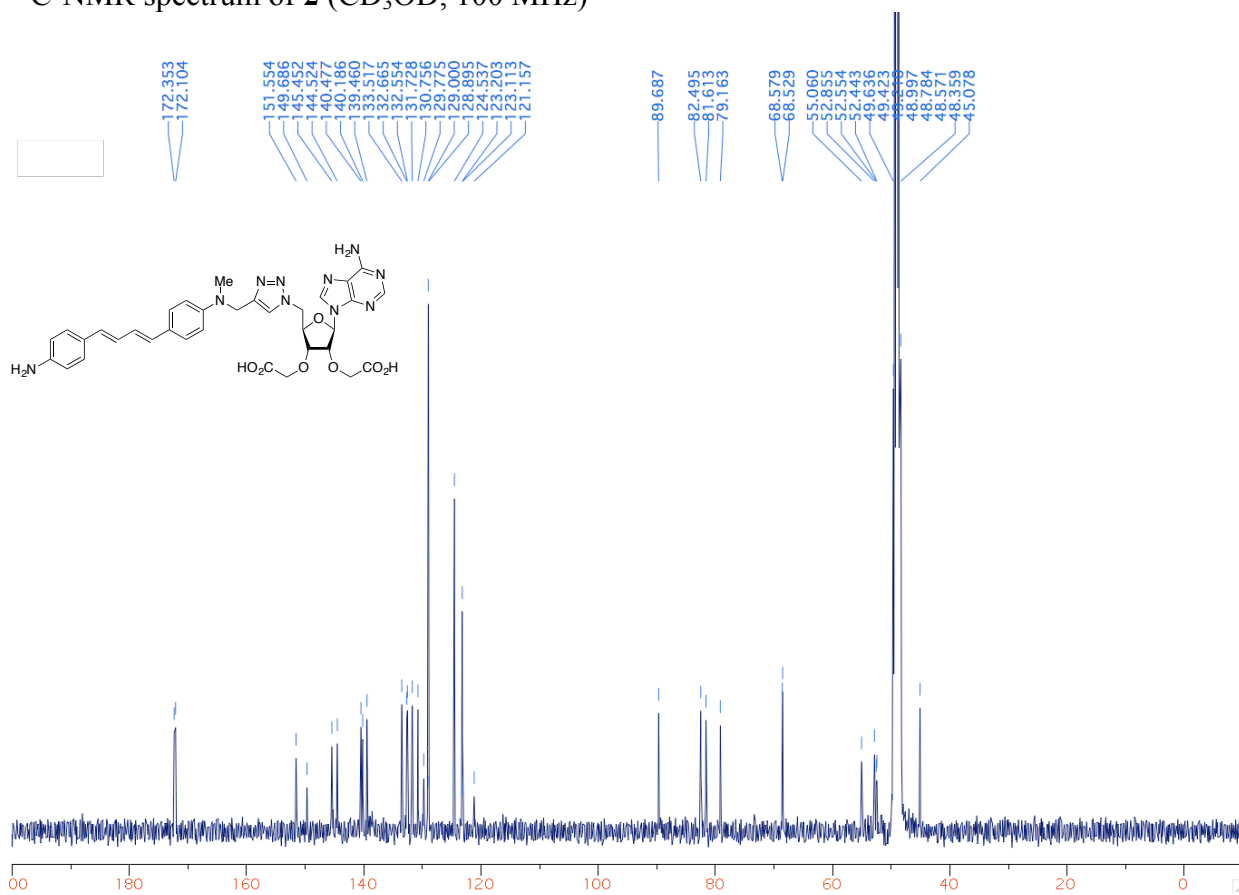

DEPT 135 spectrum of **2** (CD<sub>3</sub>OD, 100 MHz)

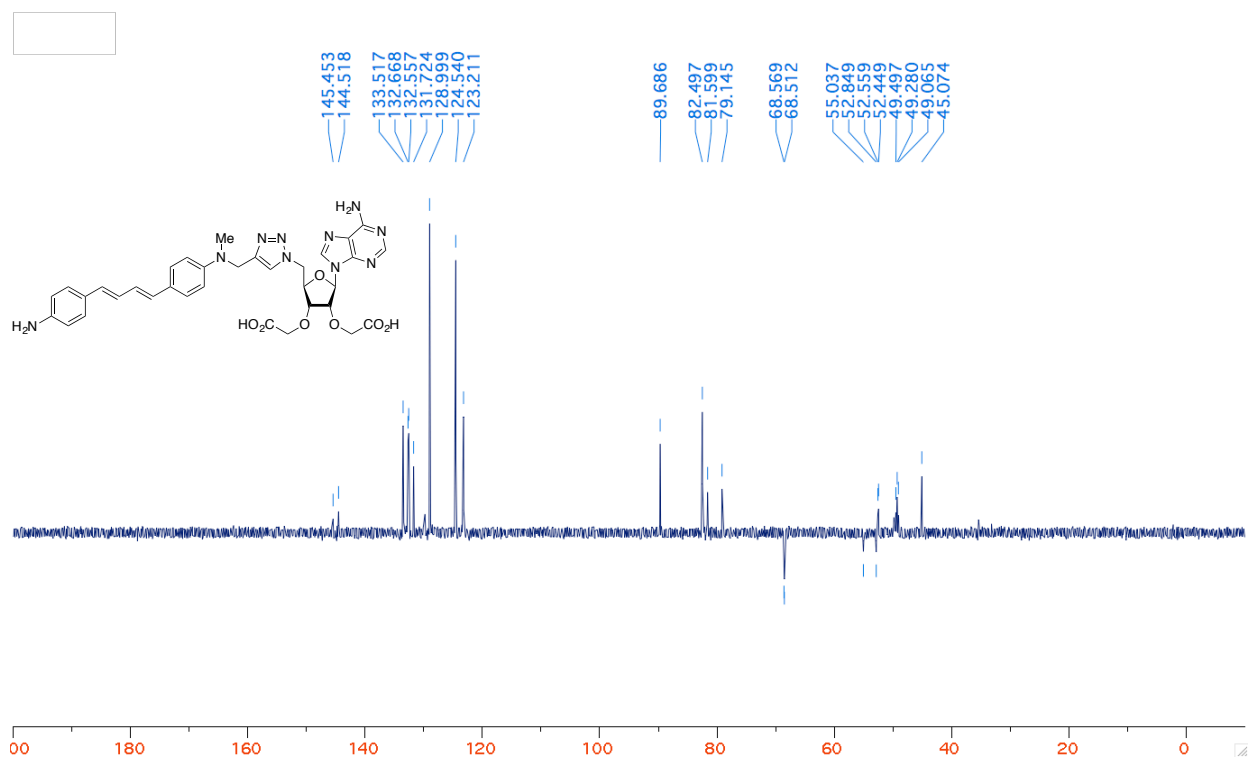

<sup>1</sup>H-NMR spectrum of **3** (CD<sub>3</sub>OD, 400 MHz)

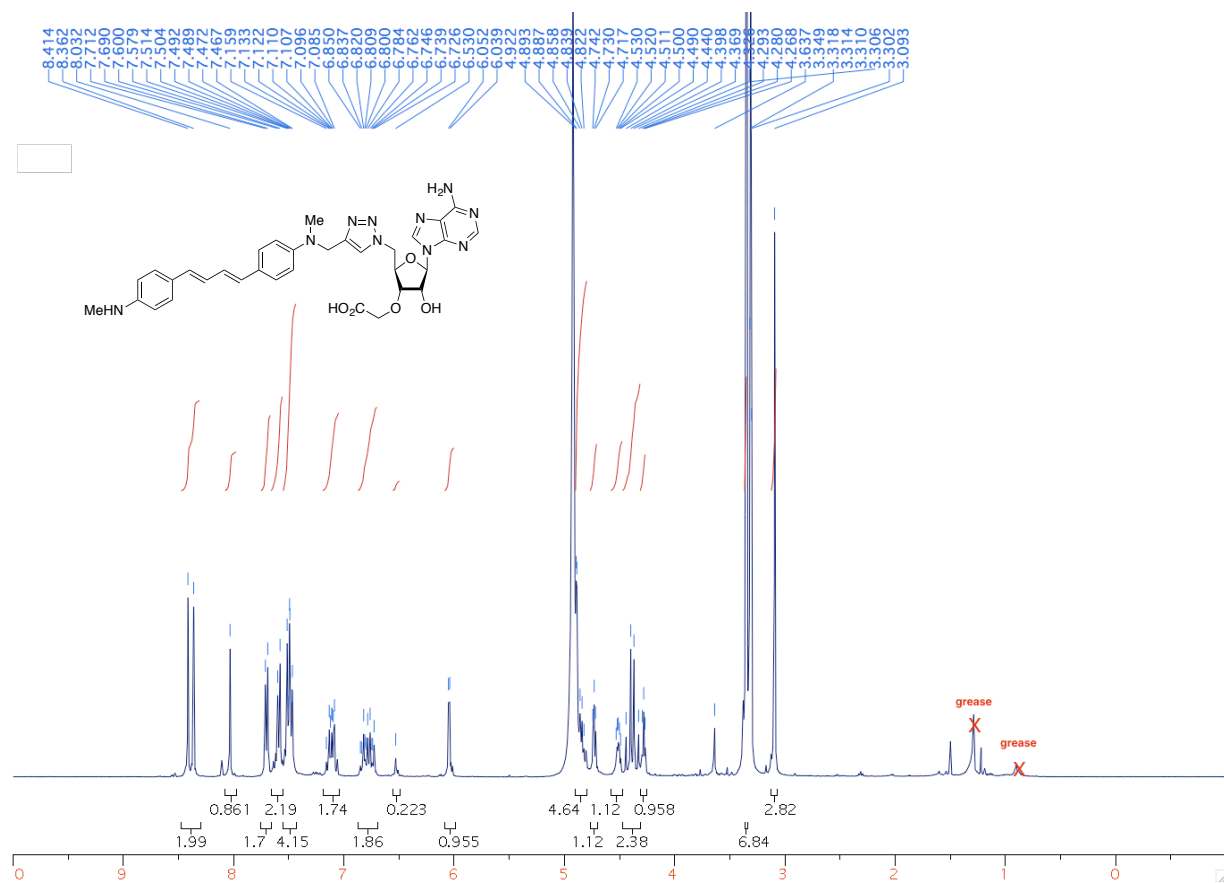

$^{13}\text{C}$ -NMR spectrum of **3** ( $\text{CD}_3\text{OD}$ , 100 MHz)

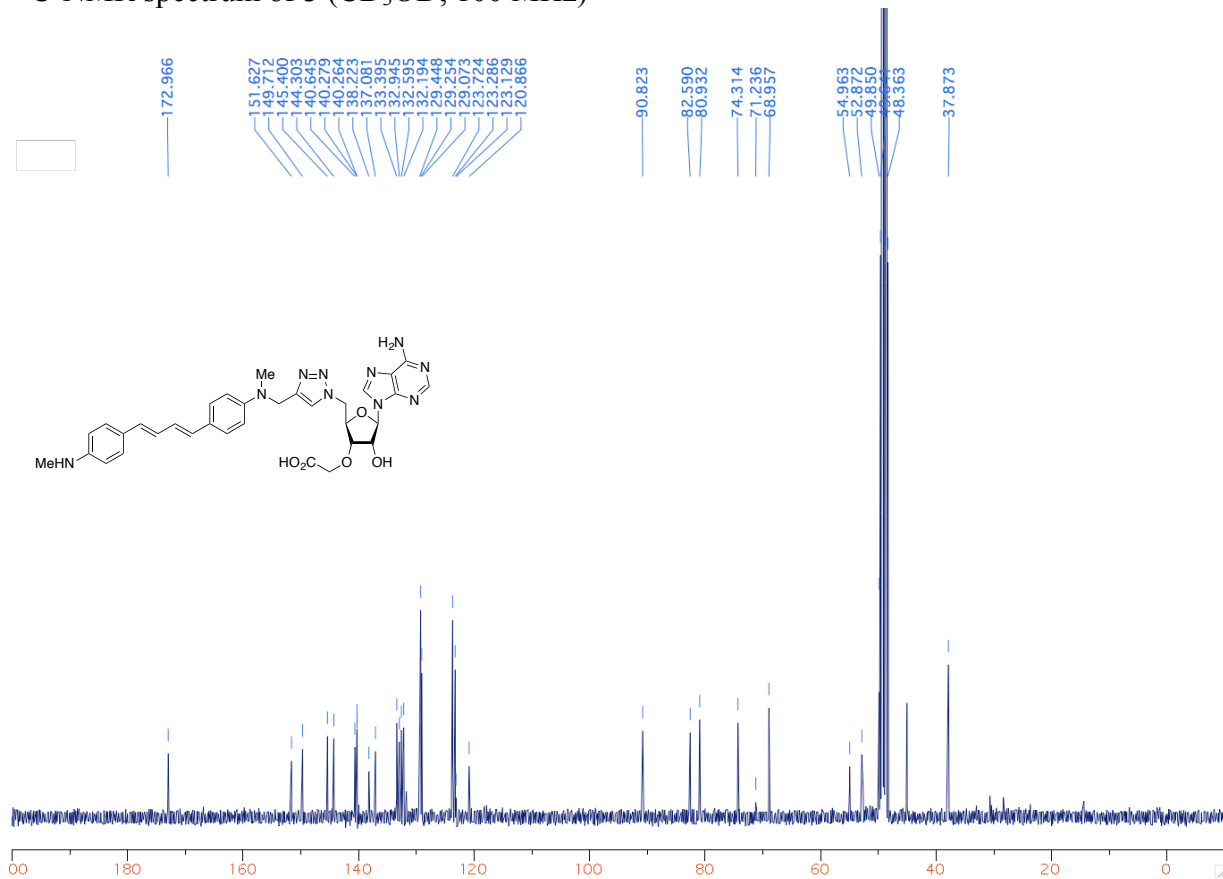

DEPT 135 spectrum of **3** ( $\text{CD}_3\text{OD}$ , 100 MHz)

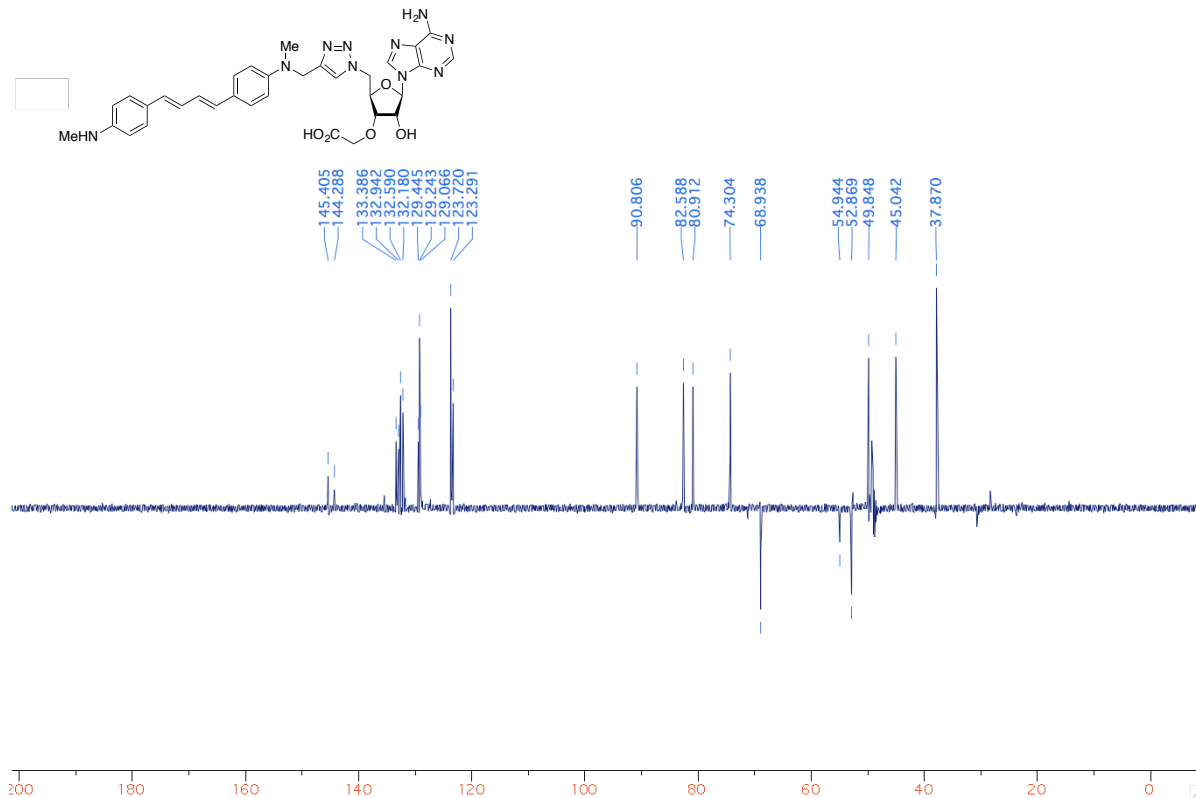

<sup>1</sup>H-NMR spectrum of 4 (CD<sub>3</sub>OD, 400 MHz)

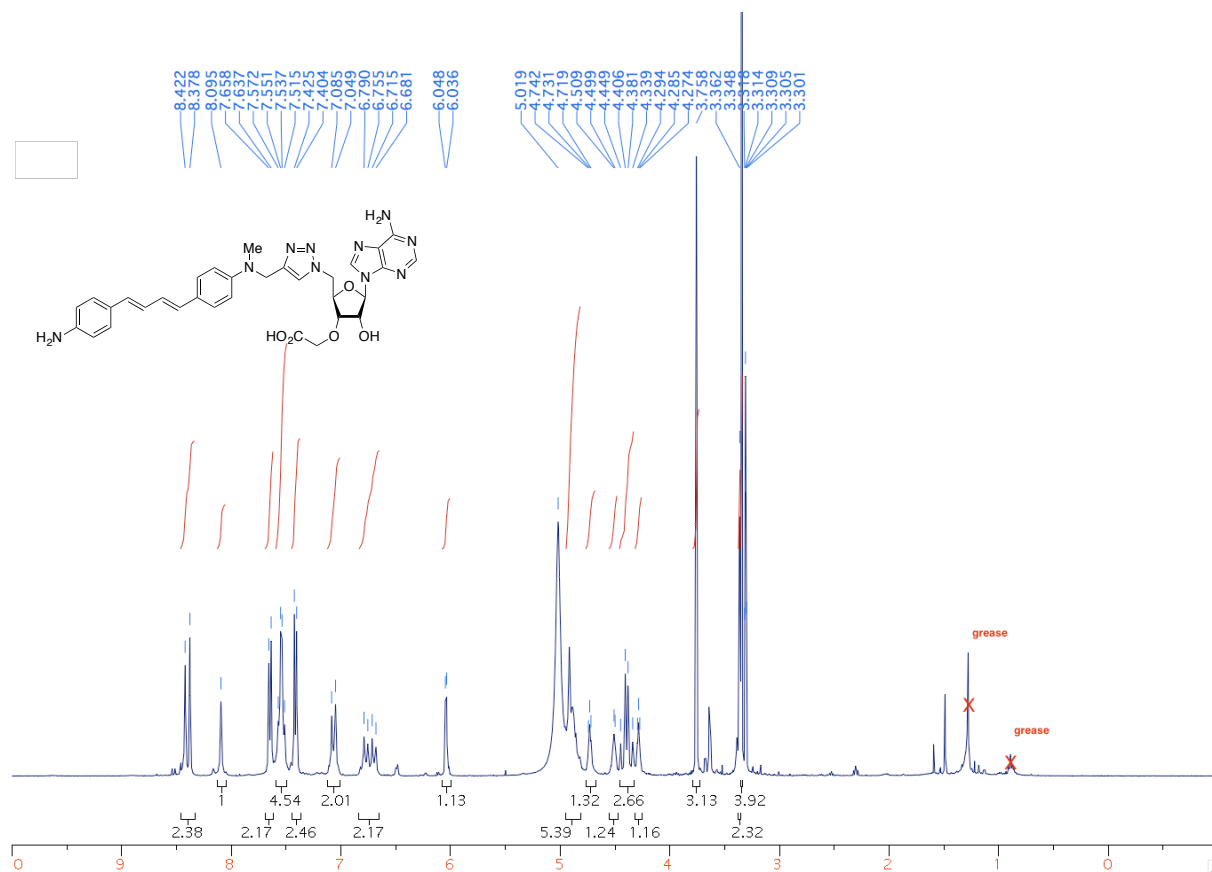

<sup>13</sup>C-NMR spectrum of 4 (CD<sub>3</sub>OD, 100 MHz)

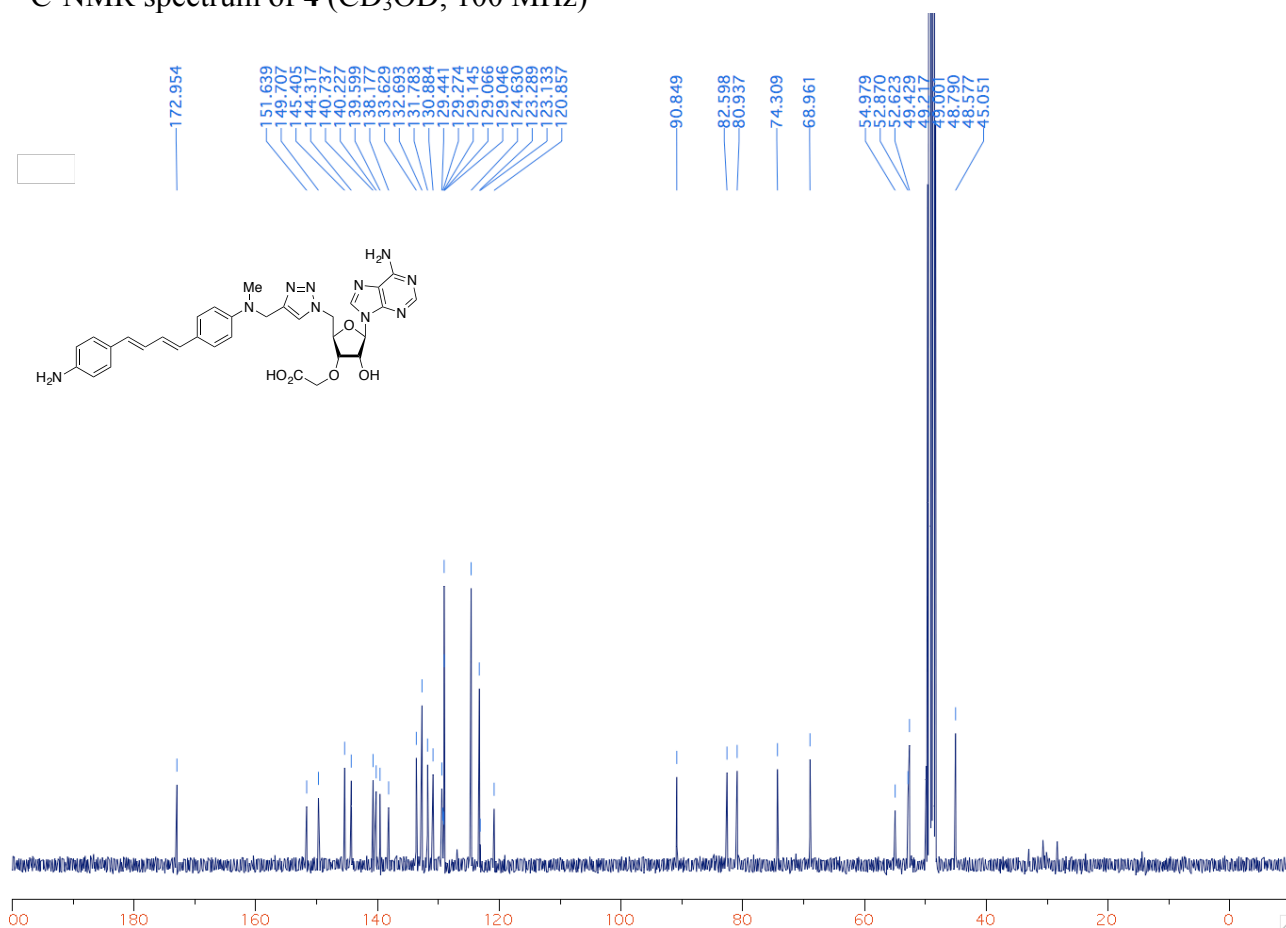



DEPT 135 spectrum of **4** (CD<sub>3</sub>OD, 100 MHz)

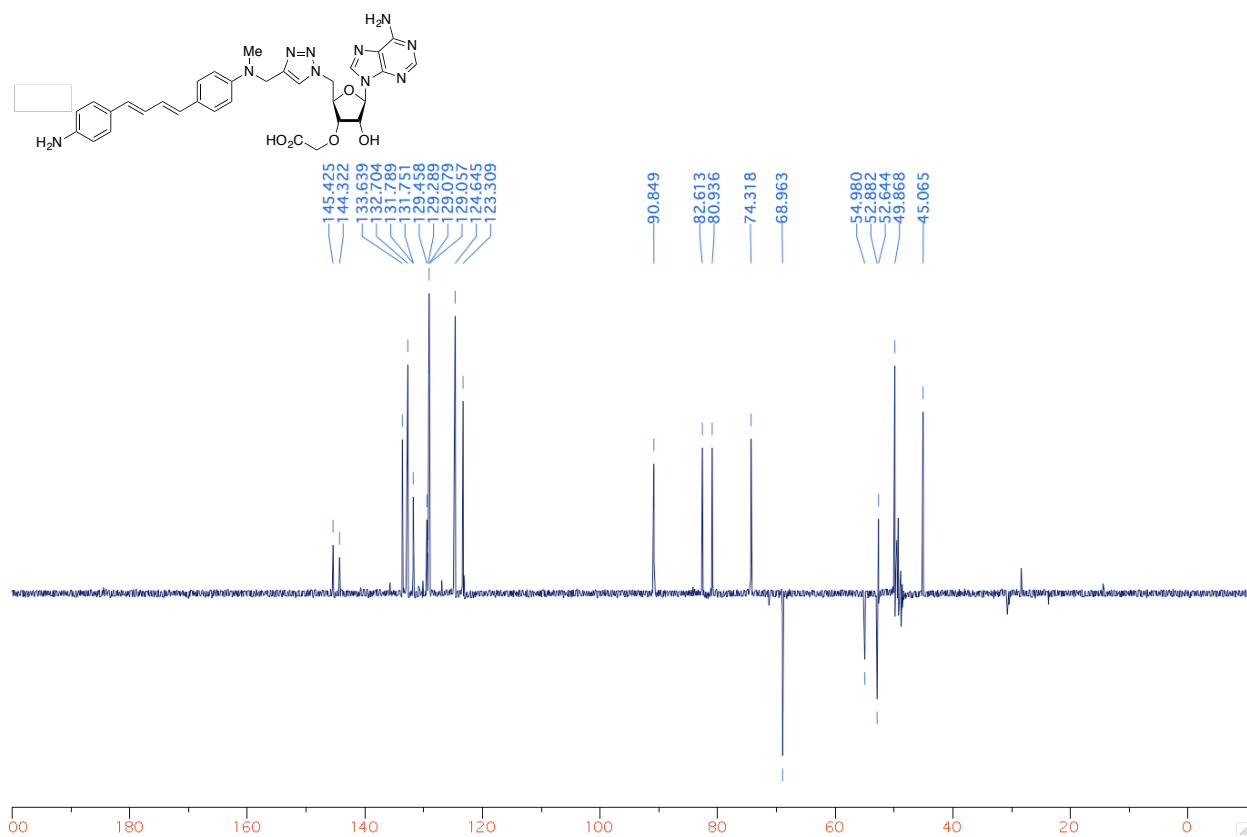

<sup>1</sup>H-NMR spectrum of **5** (CD<sub>3</sub>OD, 400 MHz)

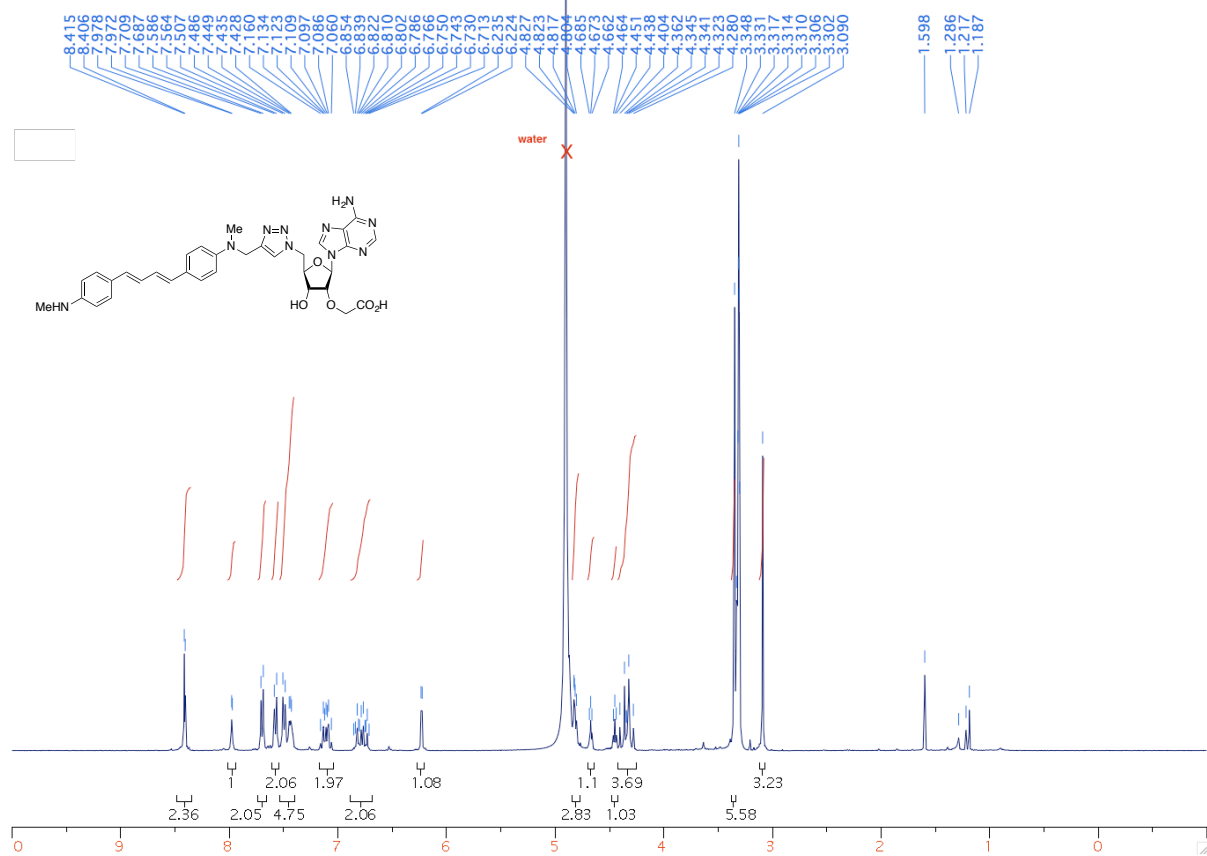

$^{13}\text{C}$ -NMR spectrum of **5** ( $\text{CD}_3\text{OD}$ , 100 MHz)

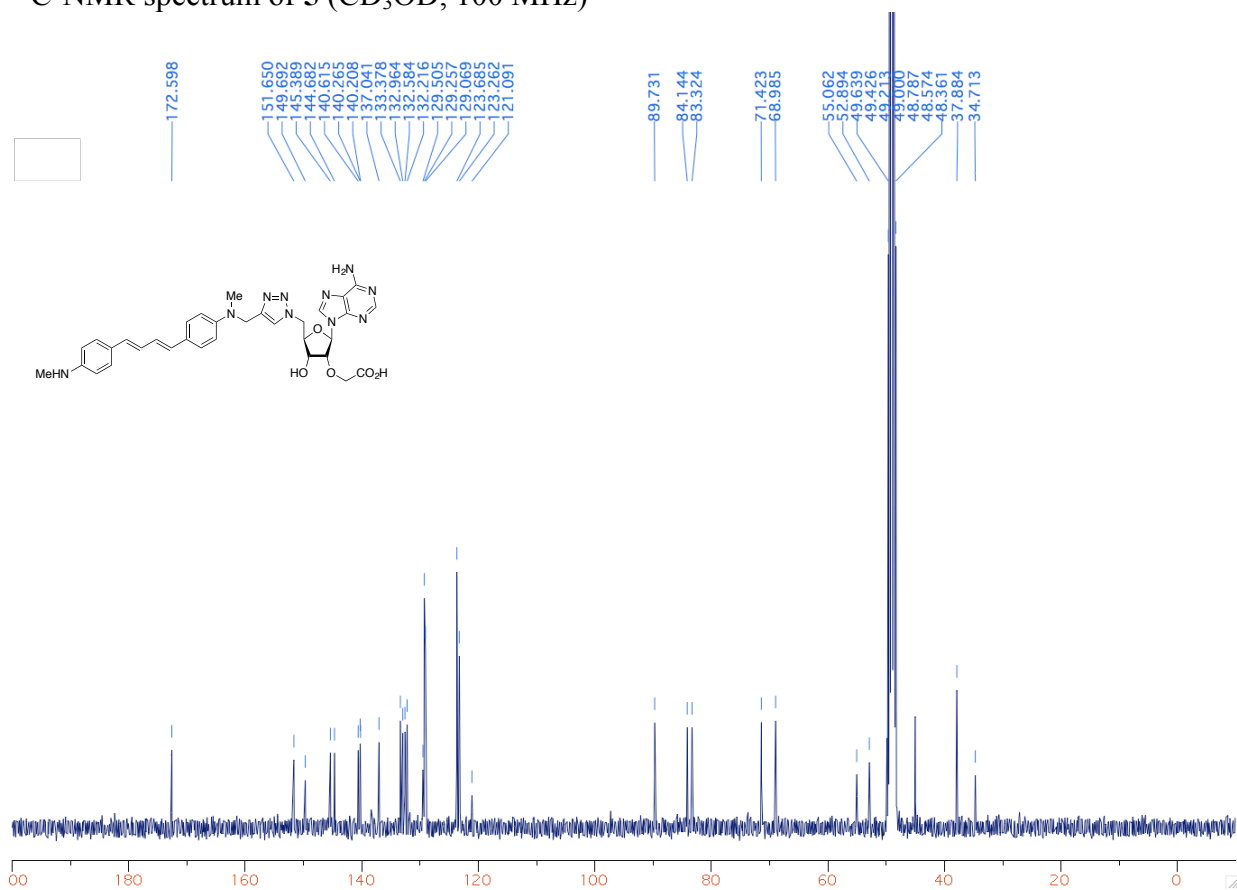

DEPT 135 spectrum of **5** ( $\text{CD}_3\text{OD}$ , 100 MHz)

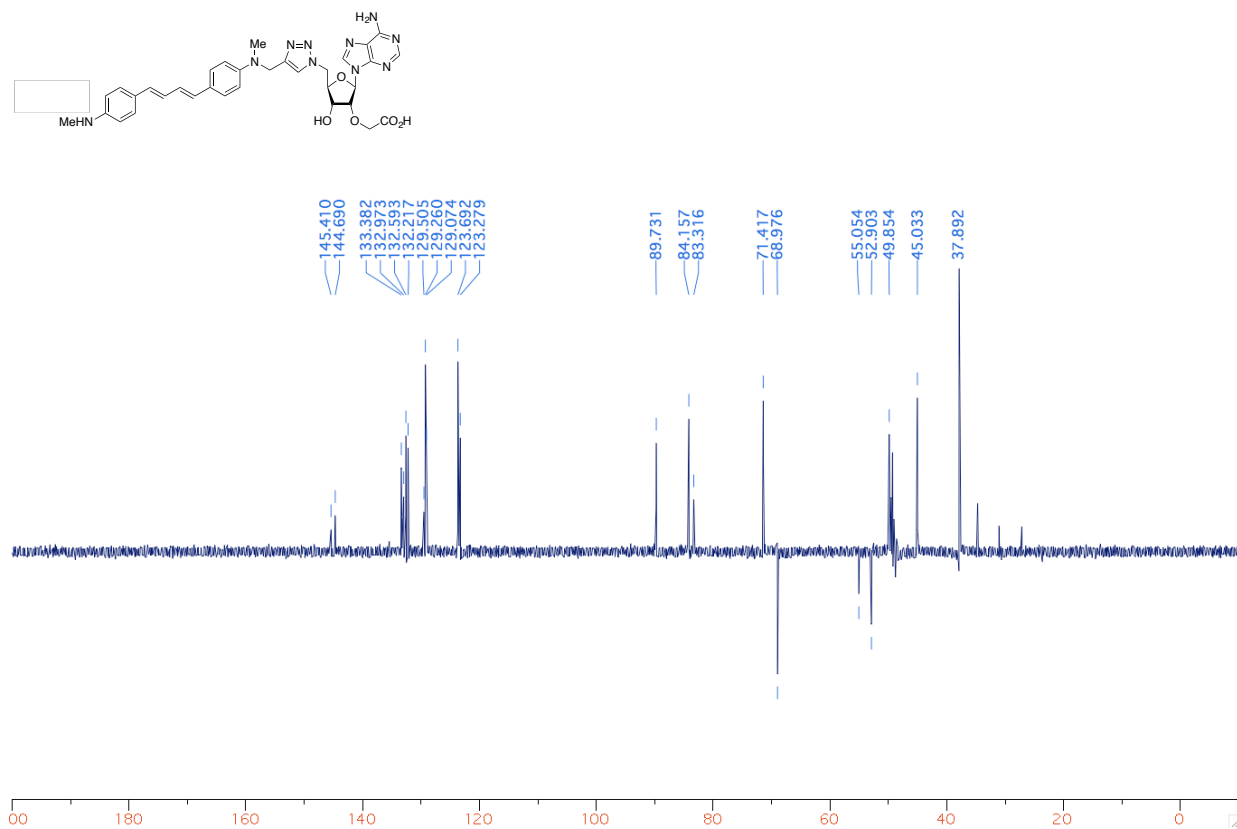

<sup>1</sup>H-NMR spectrum of **6** (CD<sub>3</sub>OD, 400 MHz)

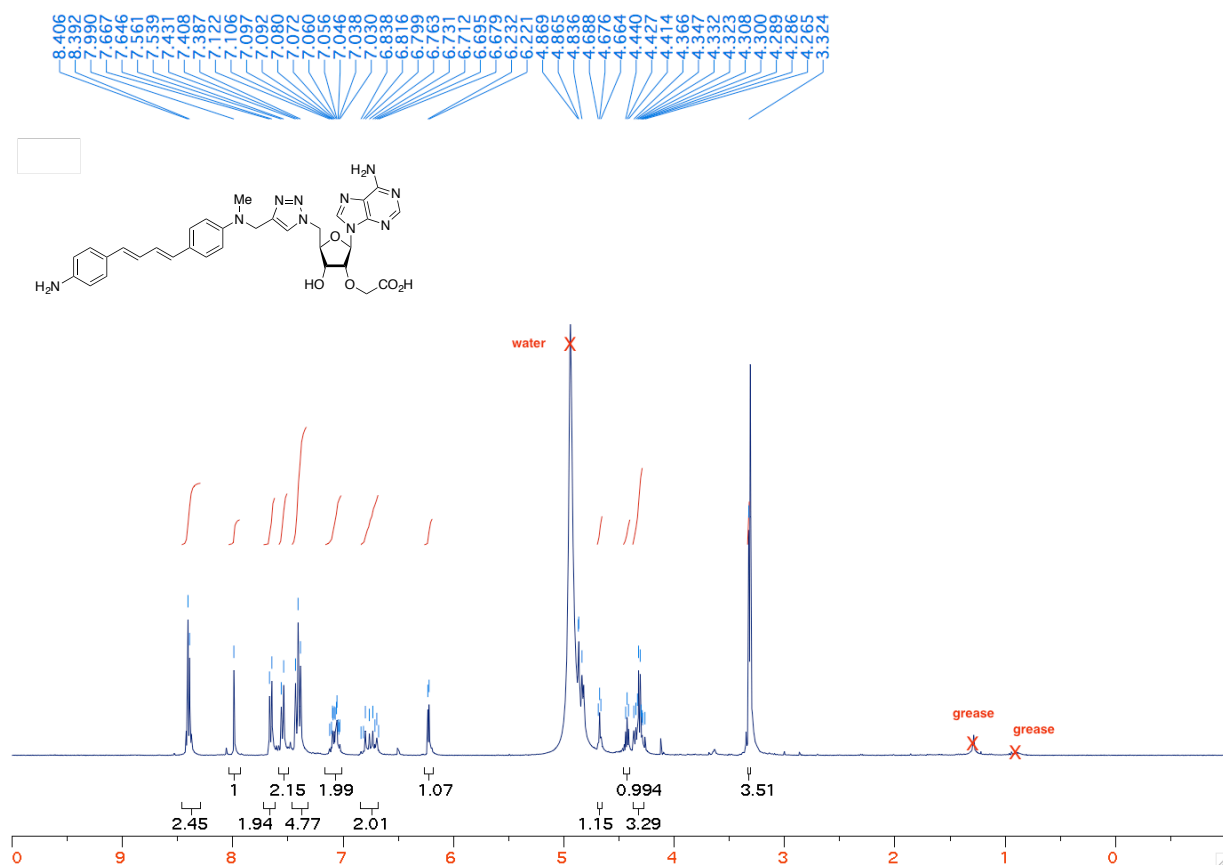

<sup>13</sup>C-NMR spectrum of **6** (CD<sub>3</sub>OD, 100 MHz)

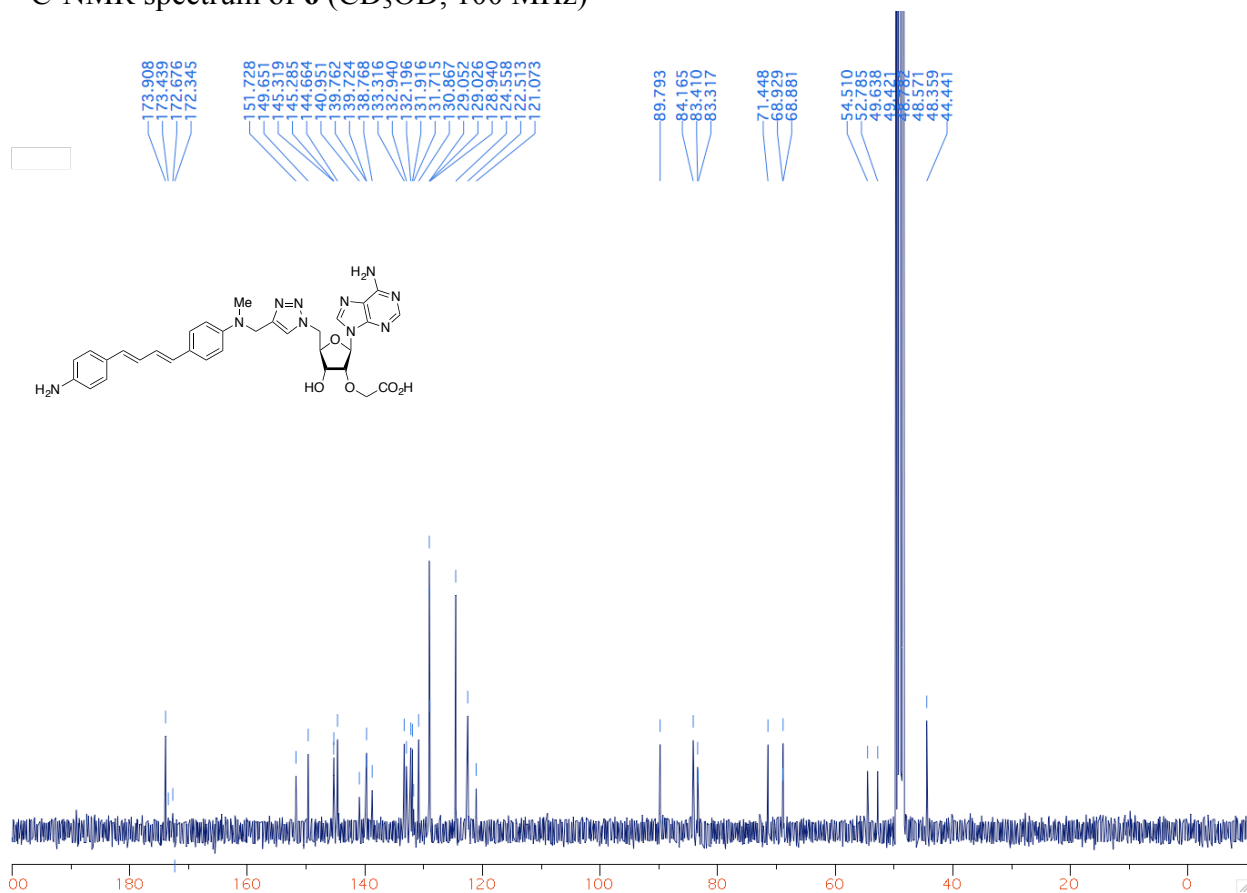

DEPT 135 spectrum of **6** (CD<sub>3</sub>OD, 100 MHz)

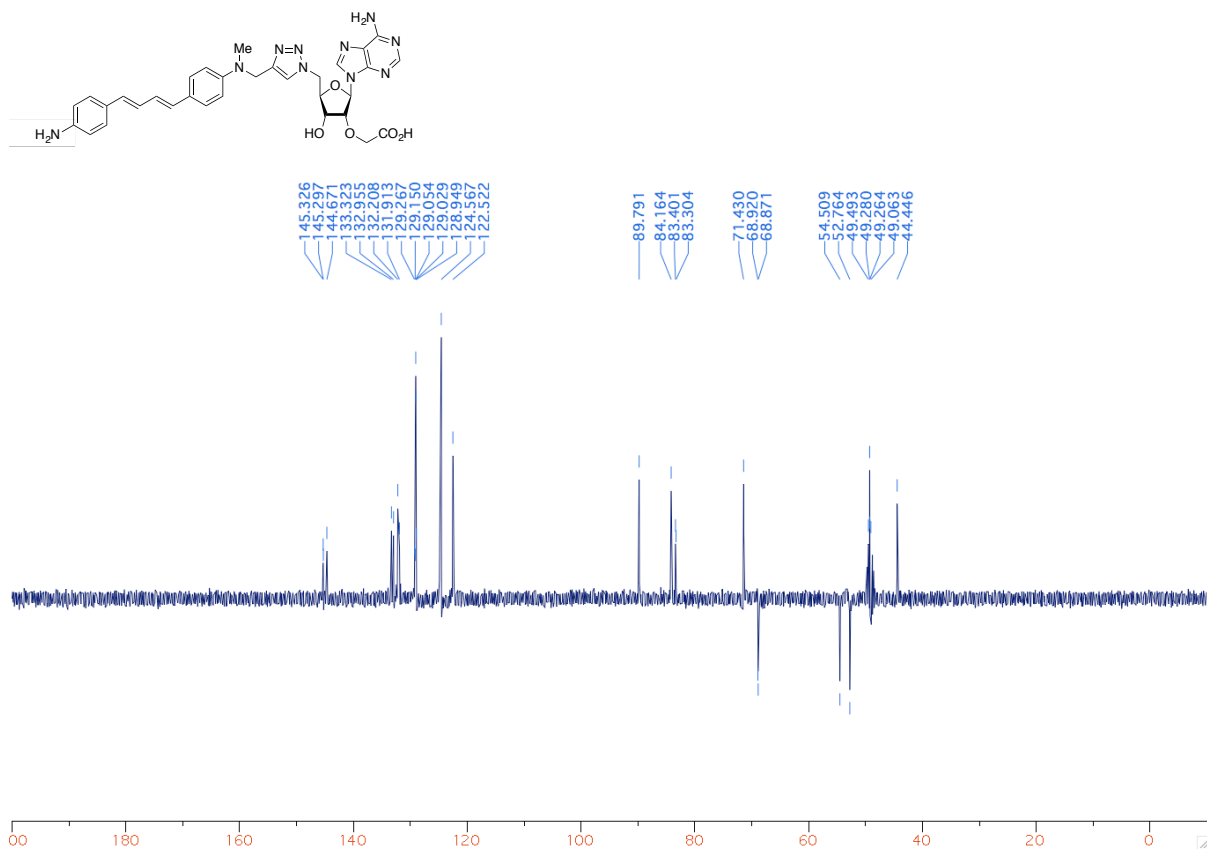

<sup>1</sup>H-NMR spectrum of **7** (CD<sub>3</sub>OD, 400 MHz)

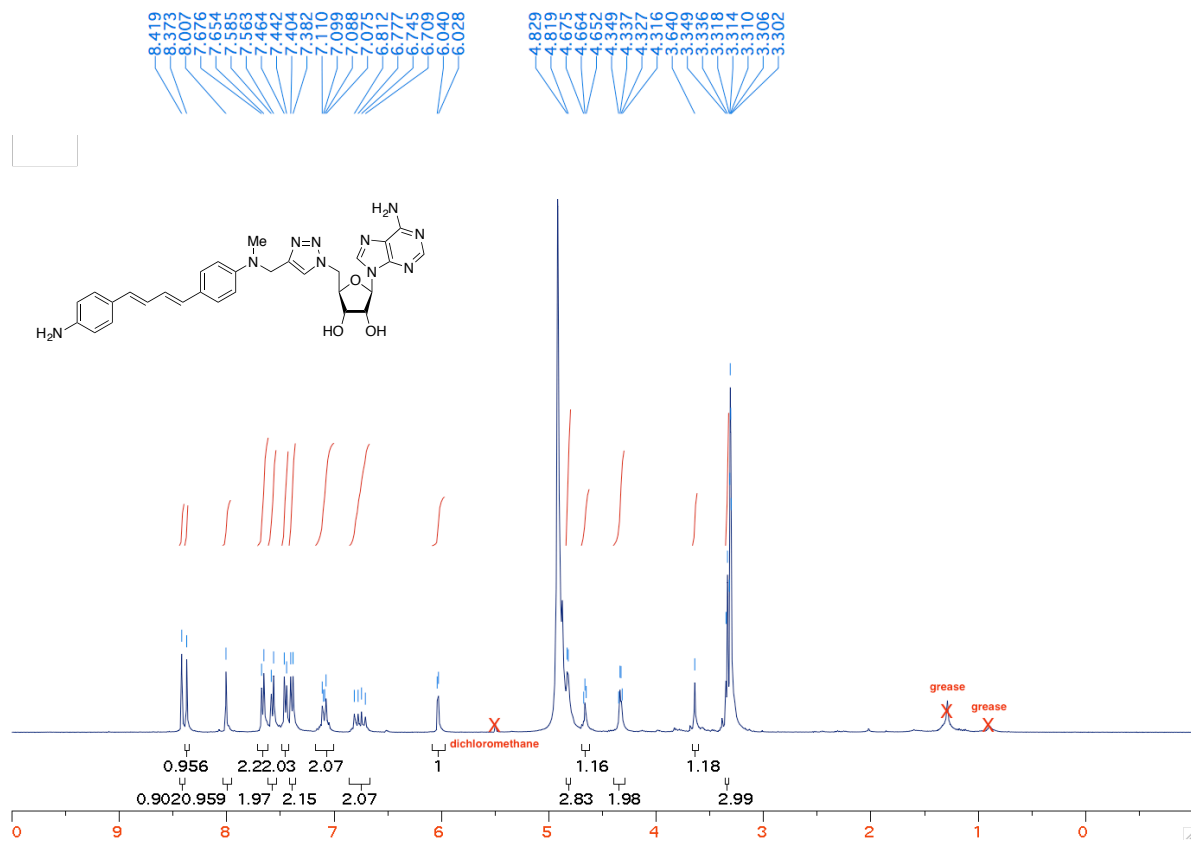

$^{13}\text{C}$ -NMR spectrum of 7 ( $\text{CD}_3\text{OD}$ , 100 MHz)

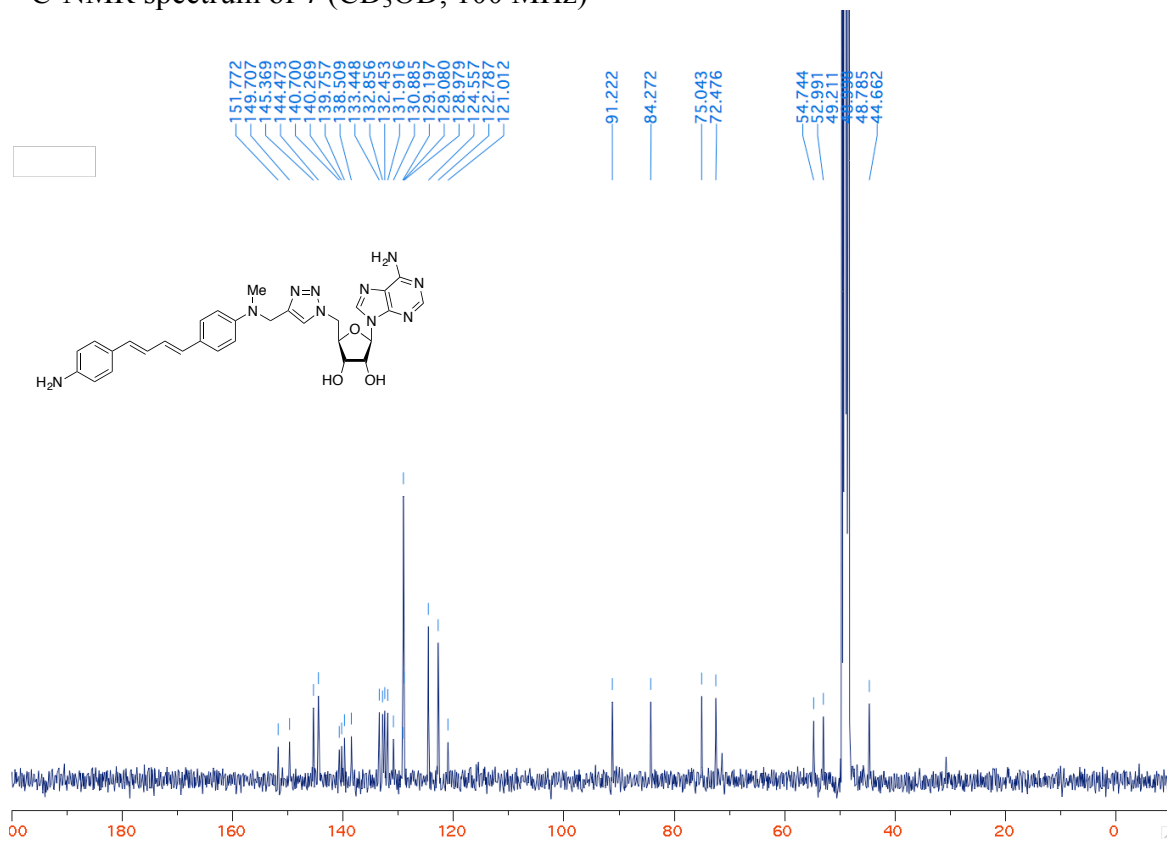

DEPT 135 spectrum of 7 ( $\text{CD}_3\text{OD}$ , 100 MHz)

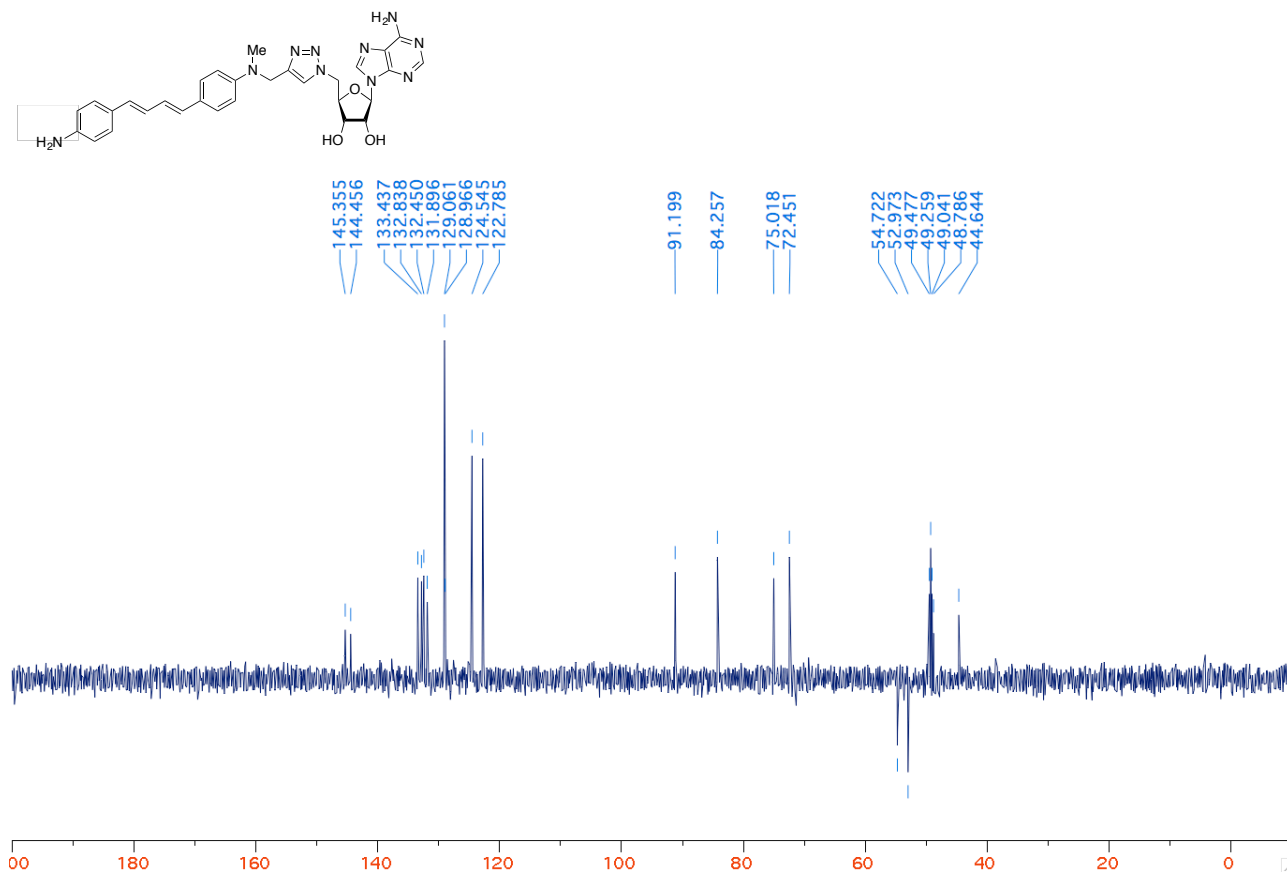

Supplement: c6ob01533f1.pdf [file c6ob01533f1.pdf]
